# Supplementary material
Source: Royal Society of Chemistry journal article supplement (doi:10.1039/d6ob00481d)

## Supporting Information

### Photo-induced thio/selenocyanation-annulation-rearrangement of indole-tethered 1,6-enynes

Xueli Wang,<sup>a</sup> Lijun Li,<sup>\*a</sup> Qinqin Yan,<sup>a</sup> Zhenyi Wang,<sup>a</sup> Zexuan Liu,<sup>a</sup> Jingyi Chen,<sup>a</sup> Zhong-Quan Liu<sup>\*b</sup>  
and Zejiang Li<sup>\*a</sup>

<sup>a</sup>State Key Laboratory of New Pharmaceutical Preparations and Excipients, Key Laboratory of Medicinal Chemistry and Molecular Diagnosis of the Ministry of Education, Key Laboratory of Chemical Biology of Hebei Province, College of Chemistry and Materials Science, Hebei University, Baoding, Hebei, 071002, P. R. China. E-mail: lizejiang898@126.com, llj@hbu.edu.cn.

<sup>b</sup>Jiangsu Collaborative Innovation Center of Chinese Medicinal Resources Industrialization, College of Pharmacy, Nanjing University of Chinese Medicine, Nanjing, Jiangsu, 210023, P. R. China. E-mail: liuzhq@lzu.edu.cn.

|                                                                                 |    |
|---------------------------------------------------------------------------------|----|
| General Information.....                                                        | 2  |
| Condition optimizations.....                                                    | 2  |
| Mechanistic studies.....                                                        | 5  |
| Crystallographic details.....                                                   | 9  |
| Luminescence quenching experiments.....                                         | 11 |
| Physical data and references for the following products.....                    | 12 |
| Copies of the <sup>1</sup> H NMR, <sup>13</sup> C NMR, <sup>19</sup> F NMR..... | 31 |

## General Information

$^1\text{H}$  and  $^{13}\text{C}$  NMR and  $^{19}\text{F}$  NMR spectra were recorded on a Bruker advance III 400 or 600 spectrometer in  $\text{CDCl}_3$  with TMS as the internal standard. High-resolution mass spectral analysis (HRMS (ESI-TOF)) data were measured on a Waters Xevo G2-XS qTOF. All products were identified by  $^1\text{H}$  and  $^{13}\text{C}$  NMR, HRMS. The raw materials were purchased from Energy, Meryer, J&K Chemicals, or Aldrich and used without further purification.

## Condition optimization

**Table S1** Optimization of thiocyanation reaction conditions.<sup>a</sup>

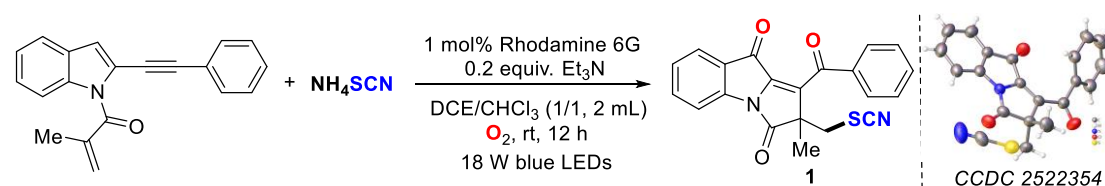

| Entry | Photocatalyst (mol%)          | Thiocyanate (equiv.)        | Base (equiv.)                                            | Solvent (mL)        | Time (h) | Yield <sup>b</sup> (%) |
|-------|-------------------------------|-----------------------------|----------------------------------------------------------|---------------------|----------|------------------------|
| 1     | Rhodamine 6G (1)              | $\text{NH}_4\text{SCN}$ (3) | DMAP (0.2)                                               | $\text{CHCl}_3$ (2) | 12 h     | 48                     |
| 2     | 4CzIPN (1)                    | $\text{NH}_4\text{SCN}$ (3) | DMAP (0.2)                                               | $\text{CHCl}_3$ (2) | 12 h     | 31                     |
| 3     | $\text{Ir}(\text{ppy})_3$ (1) | $\text{NH}_4\text{SCN}$ (3) | DMAP (0.2)                                               | $\text{CHCl}_3$ (2) | 12 h     | 26                     |
| 4     | Fluorescent (1)               | $\text{NH}_4\text{SCN}$ (3) | DMAP (0.2)                                               | $\text{CHCl}_3$ (2) | 12 h     | 15                     |
| 5     | Methylene Blue (1)            | $\text{NH}_4\text{SCN}$ (3) | DMAP (0.2)                                               | $\text{CHCl}_3$ (2) | 12 h     | 26                     |
| 6     | Acid red 94 (1)               | $\text{NH}_4\text{SCN}$ (3) | DMAP (0.2)                                               | $\text{CHCl}_3$ (2) | 12 h     | trace                  |
| 7     | Sodium rhodizonate (1)        | $\text{NH}_4\text{SCN}$ (3) | DMAP (0.2)                                               | $\text{CHCl}_3$ (2) | 12 h     | 27                     |
| 8     | Solvent red 43 (1)            | $\text{NH}_4\text{SCN}$ (3) | DMAP (0.2)                                               | $\text{CHCl}_3$ (2) | 12 h     | 45                     |
| 9     | Rhodamine 6G (2)              | $\text{NH}_4\text{SCN}$ (3) | DMAP (0.2)                                               | $\text{CHCl}_3$ (2) | 12 h     | 44                     |
| 10    | Rhodamine 6G (3)              | $\text{NH}_4\text{SCN}$ (3) | DMAP (0.2)                                               | $\text{CHCl}_3$ (2) | 12 h     | 43                     |
| 11    | Rhodamine 6G (1)              | $\text{NH}_4\text{SCN}$ (3) | $\text{Et}_3\text{N}$ (0.2)                              | $\text{CHCl}_3$ (2) | 12 h     | 54                     |
| 12    | Rhodamine 6G (1)              | $\text{NH}_4\text{SCN}$ (3) | $\text{K}_2\text{CO}_3$ (0.2)                            | $\text{CHCl}_3$ (2) | 12 h     | 35                     |
| 13    | Rhodamine 6G (1)              | $\text{NH}_4\text{SCN}$ (3) | $\text{Cs}_2\text{CO}_3$ (0.2)                           | $\text{CHCl}_3$ (2) | 12 h     | 35                     |
| 14    | Rhodamine 6G (1)              | $\text{NH}_4\text{SCN}$ (3) | $\text{K}_2\text{HPO}_4 \cdot 3\text{H}_2\text{O}$ (0.2) | $\text{CHCl}_3$ (2) | 12 h     | 30                     |
| 15    | Rhodamine 6G (1)              | $\text{NH}_4\text{SCN}$ (3) | $\text{Ag}_2\text{CO}_3$ (0.2)                           | $\text{CHCl}_3$ (2) | 12 h     | 38                     |
| 16    | Rhodamine 6G (1)              | $\text{NH}_4\text{SCN}$ (3) | $i\text{Pr}_2\text{NH}$ (0.2)                            | $\text{CHCl}_3$ (2) | 12 h     | 51                     |
| 17    | Rhodamine 6G (1)              | $\text{NH}_4\text{SCN}$ (3) | DABCO (0.2)                                              | $\text{CHCl}_3$ (2) | 12 h     | 42                     |
| 18    | Rhodamine 6G (1)              | $\text{NH}_4\text{SCN}$ (3) | Pyridine (0.2)                                           | $\text{CHCl}_3$ (2) | 12 h     | 31                     |
| 19    | Rhodamine 6G (1)              | $\text{NH}_4\text{SCN}$ (3) | $\text{CH}_3\text{CO}_2\text{Na}$ (0.2)                  | $\text{CHCl}_3$ (2) | 12 h     | 32                     |
| 20    | Rhodamine 6G (1)              | $\text{NH}_4\text{SCN}$ (3) | HOSA (0.2)                                               | $\text{CHCl}_3$ (2) | 12 h     | 30                     |

|           |                         |                              |                              |                                         |             |           |
|-----------|-------------------------|------------------------------|------------------------------|-----------------------------------------|-------------|-----------|
| 21        | Rhodamine 6G (1)        | NH <sub>4</sub> SCN (3)      | 4-cyanopyridine              | CHCl <sub>3</sub> (2)                   | 12 h        | 42        |
| 22        | Rhodamine 6G (1)        | NH <sub>4</sub> SCN (3)      | Et <sub>3</sub> N (0.25)     | CHCl <sub>3</sub> (2)                   | 12 h        | 45        |
| 23        | Rhodamine 6G (1)        | NH <sub>4</sub> SCN (3)      | Et <sub>3</sub> N (0.15)     | CHCl <sub>3</sub> (2)                   | 12 h        | 46        |
| 24        | Rhodamine 6G (1)        | NaSCN (3)                    | Et <sub>3</sub> N (0.2)      | CHCl <sub>3</sub> (2)                   | 12 h        | 38        |
| 25        | Rhodamine 6G (1)        | KSCN (3)                     | Et <sub>3</sub> N (0.2)      | CHCl <sub>3</sub> (2)                   | 12 h        | 37        |
| 26        | Rhodamine 6G (1)        | LiSCN (3)                    | Et <sub>3</sub> N (0.2)      | CHCl <sub>3</sub> (2)                   | 12 h        | trace     |
| 27        | Rhodamine 6G (1)        | CuSCN (3)                    | Et <sub>3</sub> N (0.2)      | CHCl <sub>3</sub> (2)                   | 12 h        | NR        |
| 28        | Rhodamine 6G (1)        | CoSCN (3)                    | Et <sub>3</sub> N (0.2)      | CHCl <sub>3</sub> (2)                   | 12 h        | NR        |
| 29        | Rhodamine 6G (1)        | NH <sub>4</sub> SCN (2.5)    | Et <sub>3</sub> N (0.2)      | CHCl <sub>3</sub> (2)                   | 12 h        | 40        |
| 30        | Rhodamine 6G (1)        | NH <sub>4</sub> SCN (3.5)    | Et <sub>3</sub> N (0.2)      | CHCl <sub>3</sub> (2)                   | 12 h        | 44        |
| 31        | Rhodamine 6G (1)        | NH <sub>4</sub> SCN (3)      | Et <sub>3</sub> N (0.2)      | CH <sub>3</sub> CN (2)                  | 12 h        | 23        |
| 32        | Rhodamine 6G (1)        | NH <sub>4</sub> SCN (3)      | Et <sub>3</sub> N (0.2)      | THF (2)                                 | 12 h        | NR        |
| 33        | Rhodamine 6G (1)        | NH <sub>4</sub> SCN (3)      | Et <sub>3</sub> N (0.2)      | DCE (2)                                 | 12 h        | 50        |
| 34        | Rhodamine 6G (1)        | NH <sub>4</sub> SCN (3)      | Et <sub>3</sub> N (0.2)      | DMF (2)                                 | 12 h        | trace     |
| 35        | Rhodamine 6G (1)        | NH <sub>4</sub> SCN (3)      | Et <sub>3</sub> N (0.2)      | DMSO (2)                                | 12 h        | trace     |
| 36        | Rhodamine 6G (1)        | NH <sub>4</sub> SCN (3)      | Et <sub>3</sub> N (0.2)      | Acetone (2)                             | 12 h        | trace     |
| 37        | Rhodamine 6G (1)        | NH <sub>4</sub> SCN (3)      | Et <sub>3</sub> N (0.2)      | EA (2)                                  | 12 h        | trace     |
| 38        | Rhodamine 6G (1)        | NH <sub>4</sub> SCN (3)      | Et <sub>3</sub> N (0.2)      | DCM (2)                                 | 12 h        | 38        |
| 39        | Rhodamine 6G (1)        | NH <sub>4</sub> SCN (3)      | Et <sub>3</sub> N (0.2)      | MeOH (2)                                | 12 h        | NR        |
| 40        | Rhodamine 6G (1)        | NH <sub>4</sub> SCN (3)      | Et <sub>3</sub> N (0.2)      | EtOH (2)                                | 12 h        | NR        |
| 41        | Rhodamine 6G (1)        | NH <sub>4</sub> SCN (3)      | Et <sub>3</sub> N (0.2)      | 2-chloropropane (2)                     | 12 h        | 45        |
| 42        | Rhodamine 6G (1)        | NH <sub>4</sub> SCN (3)      | Et <sub>3</sub> N (0.2)      | CHCl <sub>3</sub> (3)                   | 12 h        | 43        |
| 43        | Rhodamine 6G (1)        | NH <sub>4</sub> SCN (3)      | Et <sub>3</sub> N (0.2)      | CHCl <sub>3</sub> (4)                   | 12 h        | 37        |
| 44        | Rhodamine 6G (1)        | NH <sub>4</sub> SCN (3)      | Et <sub>3</sub> N (0.2)      | CHCl <sub>3</sub> (2.5)                 | 12 h        | 48        |
| 45        | Rhodamine 6G (1)        | NH <sub>4</sub> SCN (3)      | Et <sub>3</sub> N (0.2)      | CHCl <sub>3</sub> (1.5)                 | 12 h        | 27        |
| <b>46</b> | <b>Rhodamine 6G (1)</b> | <b>NH<sub>4</sub>SCN (3)</b> | <b>Et<sub>3</sub>N (0.2)</b> | <b>CHCl<sub>3</sub> (1)<br/>DCE (1)</b> | <b>12 h</b> | <b>61</b> |
| 47        | Rhodamine 6G (1)        | NH <sub>4</sub> SCN (3)      | Et <sub>3</sub> N (0.2)      | CHCl <sub>3</sub> (1.5)<br>DCE (1)      | 12 h        | 58        |
| 48        | Rhodamine 6G (1)        | NH <sub>4</sub> SCN (3)      | Et <sub>3</sub> N (0.2)      | CHCl <sub>3</sub> (1)<br>DCE (1.5)      | 12 h        | 50        |
| 49        | Rhodamine 6G (1)        | NH <sub>4</sub> SCN (3)      | Et <sub>3</sub> N (0.2)      | CHCl <sub>3</sub> (1.5)<br>DCE (1.5)    | 12 h        | 56        |
| 50        | Rhodamine 6G (1)        | NH <sub>4</sub> SCN (3)      | Et <sub>3</sub> N (0.2)      | CHCl <sub>3</sub> (0.5)<br>DCE (0.5)    | 12 h        | 45        |
| 51        | Rhodamine 6G (1)        | NH <sub>4</sub> SCN (3)      | Et <sub>3</sub> N (0.2)      | CHCl <sub>3</sub> (1)<br>DCE (1)        | 3 h         | 18        |

|                 |                  |                         |                         |                                  |      |       |
|-----------------|------------------|-------------------------|-------------------------|----------------------------------|------|-------|
| 52              | Rhodamine 6G (1) | NH <sub>4</sub> SCN (3) | Et <sub>3</sub> N (0.2) | CHCl <sub>3</sub> (1)<br>DCE (1) | 6 h  | 31    |
| 53              | Rhodamine 6G (1) | NH <sub>4</sub> SCN (3) | Et <sub>3</sub> N (0.2) | CHCl <sub>3</sub> (1)<br>DCE (1) | 9 h  | 50    |
| 54              | Rhodamine 6G (1) | NH <sub>4</sub> SCN (3) | Et <sub>3</sub> N (0.2) | CHCl <sub>3</sub> (1)<br>DCE (1) | 15 h | 52    |
| 55 <sup>c</sup> | Rhodamine 6G (1) | NH <sub>4</sub> SCN (3) | Et <sub>3</sub> N (0.2) | CHCl <sub>3</sub> (1)<br>DCE (1) | 12 h | 15    |
| 56 <sup>d</sup> | Rhodamine 6G (1) | NH <sub>4</sub> SCN (3) | Et <sub>3</sub> N (0.2) | CHCl <sub>3</sub> (1)<br>DCE (1) | 12 h | 39    |
| 57 <sup>e</sup> | Rhodamine 6G (1) | NH <sub>4</sub> SCN (3) | Et <sub>3</sub> N (0.2) | CHCl <sub>3</sub> (1)<br>DCE (1) | 12 h | trace |
| 58 <sup>f</sup> | Rhodamine 6G (1) | NH <sub>4</sub> SCN (3) | Et <sub>3</sub> N (0.2) | CHCl <sub>3</sub> (1)<br>DCE (1) | 12 h | 53    |

<sup>a</sup>Reaction conditions: indole-tethered 1,6-enyne (1 equiv., 0.1 mmol), NH<sub>4</sub>SCN (3 equiv.), Rhodamine 6G (1 mol%), Et<sub>3</sub>N (0.2 equiv.), CHCl<sub>3</sub> (1 mL), DCE (1 mL), O<sub>2</sub>, 18 W blue LEDs, rt, 12 h.

<sup>b</sup>Isolated yields. <sup>c</sup>9 W blue LEDs. <sup>d</sup>12 W blue LEDs. <sup>e</sup>12 W purple LEDs. <sup>f</sup>25 W blue LEDs.

**Table S2** Optimization of selenocyanation reaction conditions.<sup>a</sup>

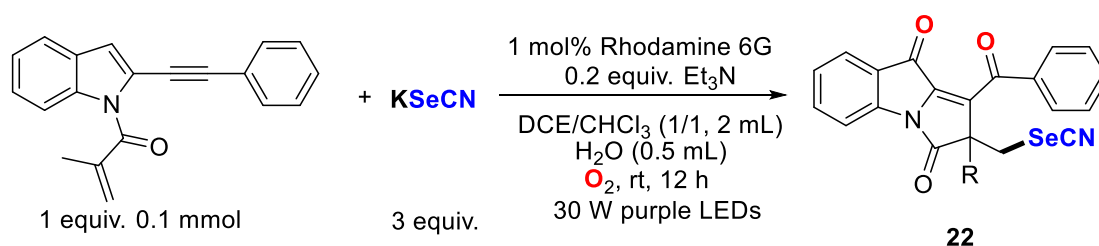

| Entry (equiv.) | Photocatalyst (mol%)    | Thiocyanate (equiv.) | Base (equiv.)                | Solvent (mL)                                                                 | Time (h)    | Yield <sup>b</sup> (%) |
|----------------|-------------------------|----------------------|------------------------------|------------------------------------------------------------------------------|-------------|------------------------|
| 1              | <b>Rhodamine 6G (1)</b> | <b>KSeCN (3)</b>     | <b>Et<sub>3</sub>N (0.2)</b> | <b>CHCl<sub>3</sub> (1)</b><br><b>DCE (1)</b><br><b>H<sub>2</sub>O (0.5)</b> | <b>12 h</b> | <b>43</b>              |
| 2              | Rhodamine 6G (1)        | KSeCN (3)            | Et <sub>3</sub> N (0.2)      | CHCl <sub>3</sub> (2)<br>H <sub>2</sub> O (0.5)                              | 12 h        | 36                     |
| 3              | Rhodamine 6G (1)        | KSeCN (3)            | Et <sub>3</sub> N (0.2)      | DCE (2)<br>H <sub>2</sub> O (0.5)                                            | 12 h        | 31                     |
| 4              | Rhodamine 6G (1)        | KSeCN (3)            | Et <sub>3</sub> N (0.2)      | EA (2)<br>H <sub>2</sub> O (0.5)                                             | 12 h        | trace                  |
| 5              | Rhodamine 6G (1)        | KSeCN (3)            | Et <sub>3</sub> N (0.2)      | DCM (2)<br>H <sub>2</sub> O (0.5)                                            | 12 h        | 26                     |
| 6              | Rhodamine 6G (1)        | KSeCN (3)            | Et <sub>3</sub> N (0.2)      | 1,4-dioxane (2)<br>H <sub>2</sub> O (0.5)                                    | 12 h        | NR                     |
| 7              | Rhodamine 6G (1)        | KSeCN (3)            | Et <sub>3</sub> N (0.2)      | CH <sub>3</sub> CN (2)<br>H <sub>2</sub> O (0.5)                             | 12 h        | trace                  |

|                 |                  |           |                         |                                                            |      |    |
|-----------------|------------------|-----------|-------------------------|------------------------------------------------------------|------|----|
| 8               | Rhodamine 6G (1) | KSeCN (3) | Et <sub>3</sub> N (0.2) | THF (2)<br>H <sub>2</sub> O (0.5)                          | 12 h | NR |
| 9               | Rhodamine 6G (1) | KSeCN (3) | Et <sub>3</sub> N (0.2) | CHCl <sub>3</sub> (1)<br>DCE (1)<br>H <sub>2</sub> O (0.8) | 12 h | 33 |
| 10              | Rhodamine 6G (1) | KSeCN (3) | Et <sub>3</sub> N (0.2) | CHCl <sub>3</sub> (1)<br>DCE (1)                           | 12 h | NR |
| 11              | Rhodamine 6G (1) | KSeCN (3) | Et <sub>3</sub> N (0.2) | CHCl <sub>3</sub> (1)<br>DCE (1)<br>H <sub>2</sub> O (0.5) | 6 h  | 29 |
| 12              | Rhodamine 6G (1) | KSeCN (3) | Et <sub>3</sub> N (0.2) | CHCl <sub>3</sub> (1)<br>DCE (1)<br>H <sub>2</sub> O (0.5) | 18 h | 36 |
| 13 <sup>c</sup> | Rhodamine 6G (1) | KSeCN (3) | Et <sub>3</sub> N (0.2) | CHCl <sub>3</sub> (1)<br>DCE (1)<br>H <sub>2</sub> O (0.5) | 12 h | 15 |

<sup>a</sup>Reaction conditions: indole-tethered 1,6-enynes (1 equiv., 0.1 mmol), KSeCN (3 equiv.), Rhodamine 6G (1 mol%), Et<sub>3</sub>N (0.2 equiv.), CHCl<sub>3</sub> (1 mL), DCE (1 mL), H<sub>2</sub>O (0.5 mL), O<sub>2</sub>, 30 W purple LEDs, rt, 12 h. <sup>b</sup>Isolated yields. <sup>c</sup>18 W blue LEDs.

## Mechanistic studies

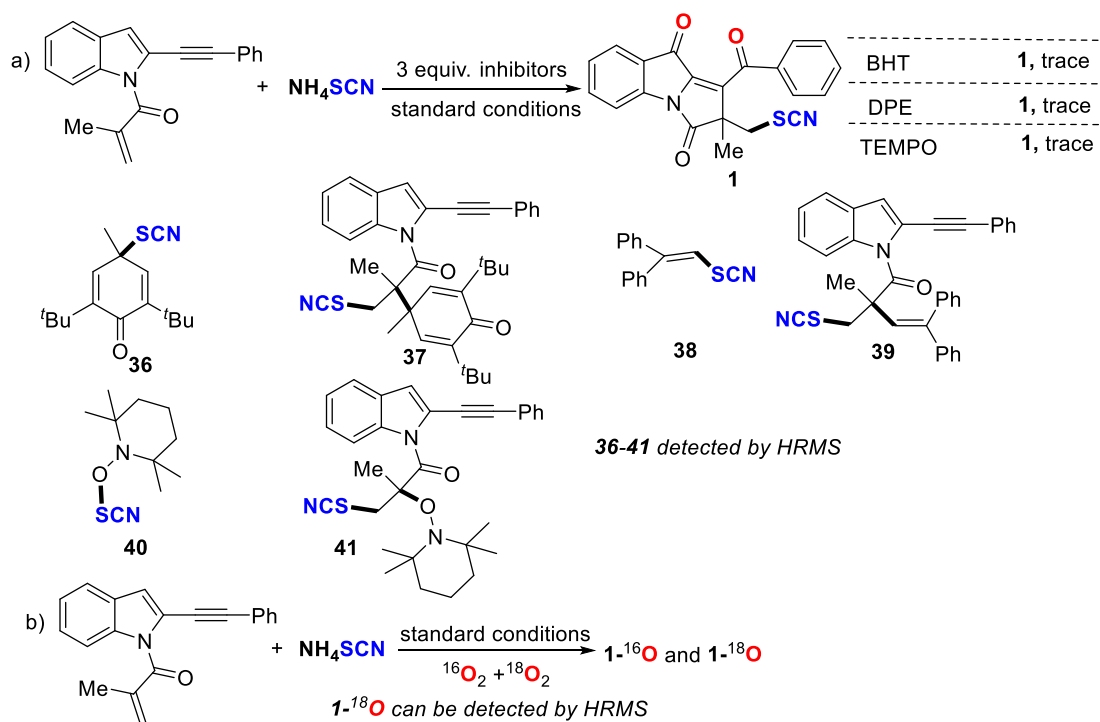

| Sample No. | Formula (M)                         | Ion Formula                         | Measured m/z | Calc m/z | Diff (ppm) |
|------------|-------------------------------------|-------------------------------------|--------------|----------|------------|
| 36         | C <sub>16</sub> H <sub>23</sub> NOS | C <sub>16</sub> H <sub>24</sub> NOS | 278.1566     | 278.1573 | -2.52      |

583 #46 RT: 0.06 AV: 1 NL: 2.69E8  
T: FTMS + p APCI corona Full ms [120.0000-1000.0000]

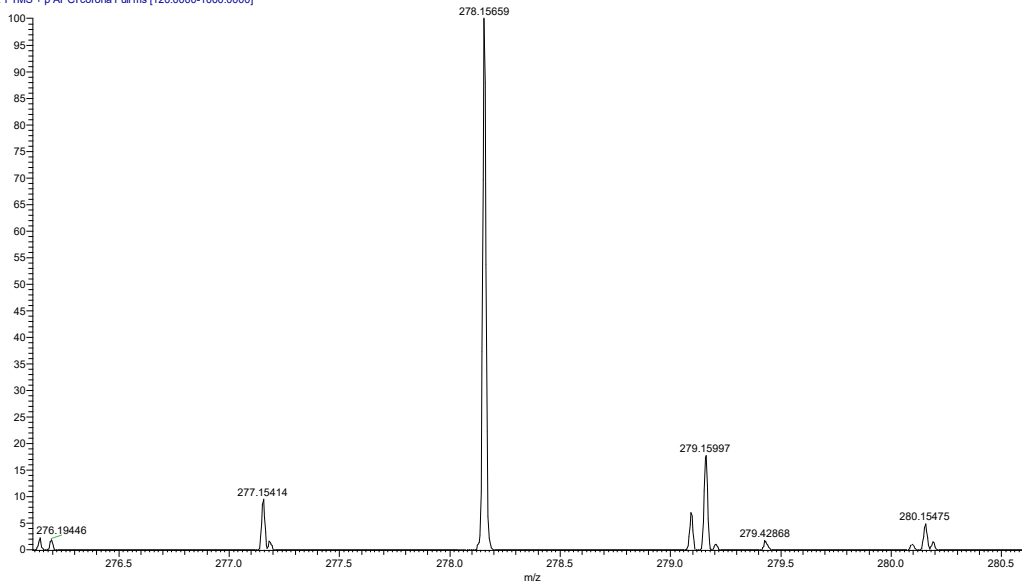

| Sample No. | Formula (M)                                                     | Ion Formula                                                     | Measured m/z | Calc m/z | Diff (ppm) |
|------------|-----------------------------------------------------------------|-----------------------------------------------------------------|--------------|----------|------------|
| 37         | C <sub>36</sub> H <sub>38</sub> N <sub>2</sub> O <sub>2</sub> S | C <sub>36</sub> H <sub>39</sub> N <sub>2</sub> O <sub>2</sub> S | 563.2719     | 563.2727 | -1.42      |

583 #85 RT: 0.11 AV: 1 NL: 2.54E8  
T: FTMS + p APCI corona Full ms [120.0000-1000.0000]

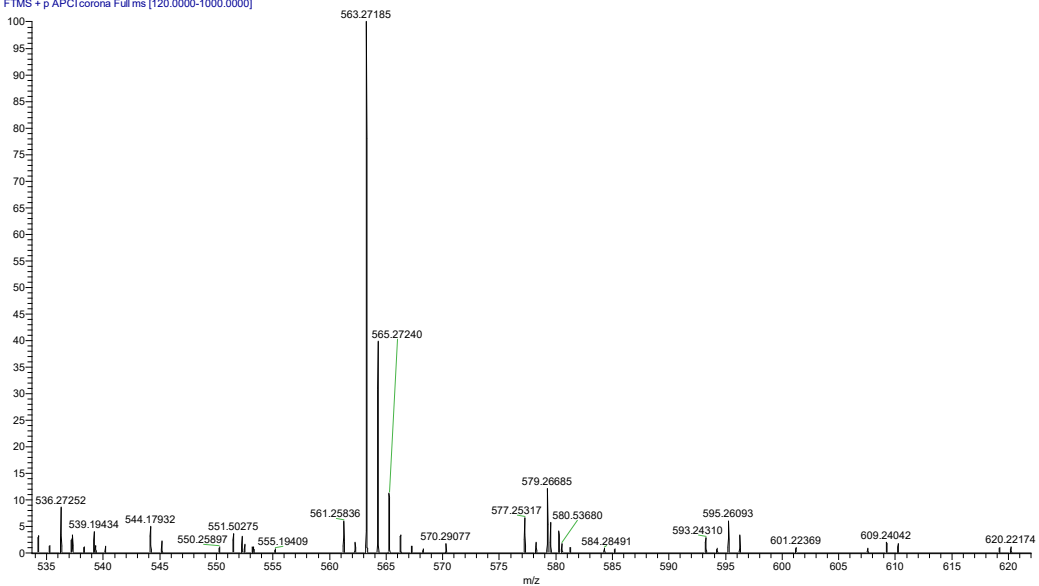

| Sample No. | Formula (M)                        | Ion Formula                        | Measured m/z | Calc m/z | Diff (ppm) |
|------------|------------------------------------|------------------------------------|--------------|----------|------------|
| 38         | C <sub>15</sub> H <sub>11</sub> NS | C <sub>15</sub> H <sub>12</sub> NS | 238.0678     | 238.0685 | -2.94      |

584 #64 RT: 0.08 AV: 1 NL: 5.64E7  
T: FTMS + p APCI corona Full ms [120.0000-1000.0000]

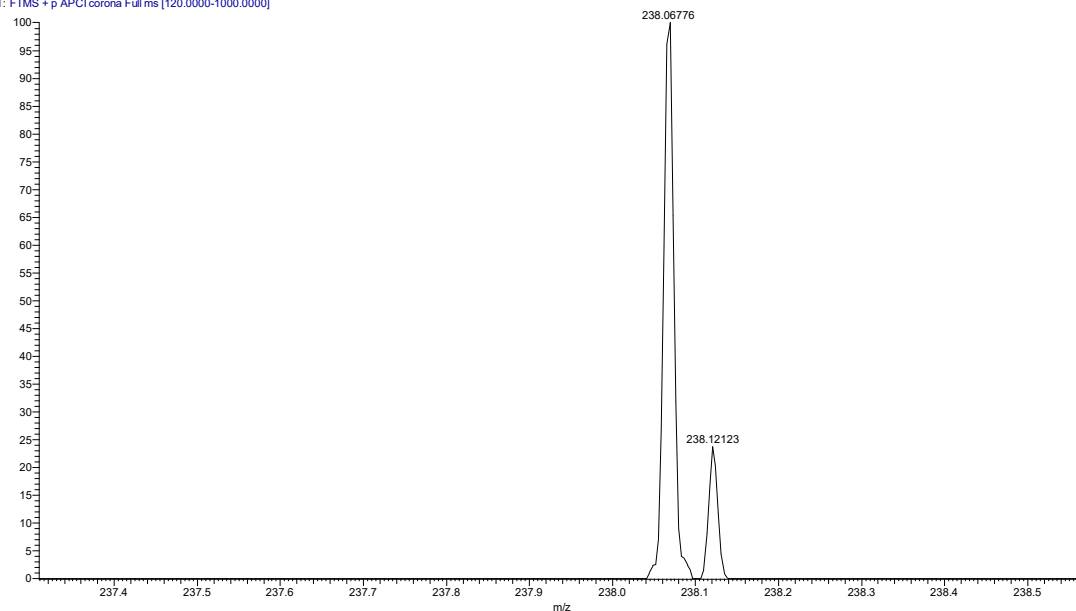

| Sample No. | Formula (M)                                       | Ion Formula                                       | Measured m/z | Calc m/z | Diff (ppm) |
|------------|---------------------------------------------------|---------------------------------------------------|--------------|----------|------------|
| 39         | C <sub>35</sub> H <sub>26</sub> N <sub>2</sub> OS | C <sub>35</sub> H <sub>27</sub> N <sub>2</sub> OS | 523.1836     | 523.1839 | -0.57      |

584 #27 RT: 0.04 AV: 1 NL: 6.84E7  
T: FTMS + p APCI corona Full ms [120.0000-1000.0000]

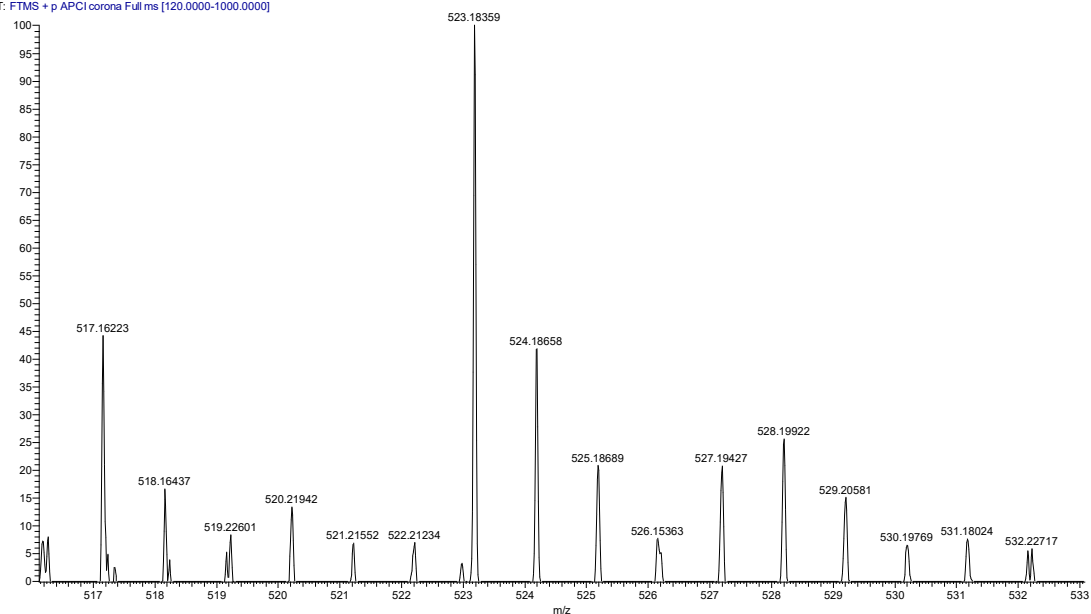

| Sample No. | Formula (M)                                       | Ion Formula                                       | Measured m/z | Calc m/z | Diff (ppm) |
|------------|---------------------------------------------------|---------------------------------------------------|--------------|----------|------------|
| 40         | C <sub>10</sub> H <sub>18</sub> N <sub>2</sub> OS | C <sub>10</sub> H <sub>19</sub> N <sub>2</sub> OS | 215.1207     | 215.1213 | -2.79      |

582 #314 RT: 0.40 AV: 1 NL: 8.21E5  
T: FTMS + p APCI corona Full ms [120.0000-1000.0000]

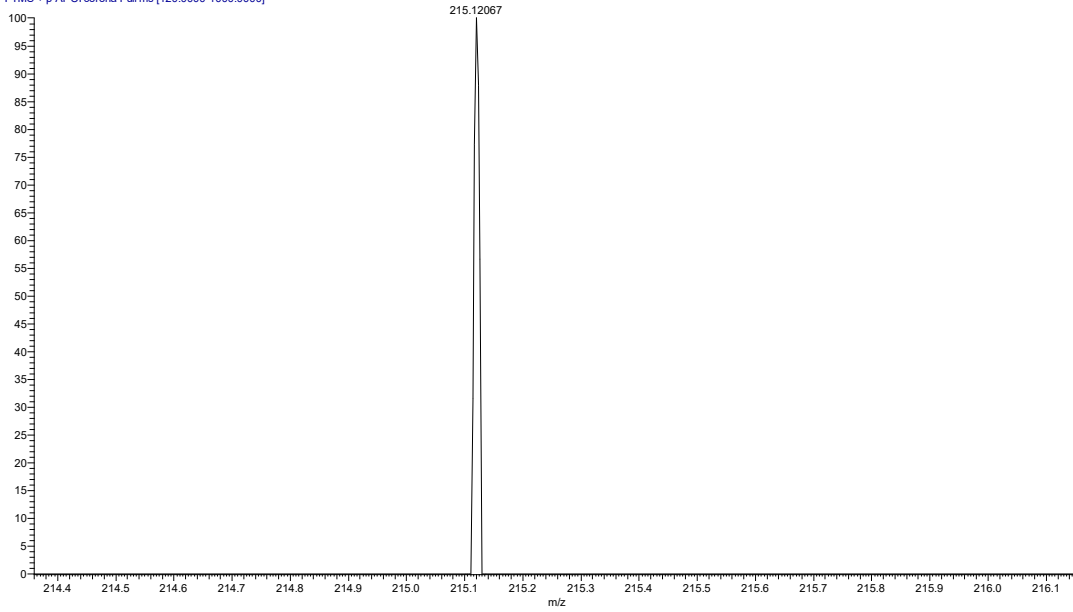

| Sample No. | Formula (M)                                                     | Ion Formula                                                     | Measured m/z | Calc m/z | Diff (ppm) |
|------------|-----------------------------------------------------------------|-----------------------------------------------------------------|--------------|----------|------------|
| 41         | C <sub>30</sub> H <sub>33</sub> N <sub>3</sub> O <sub>2</sub> S | C <sub>30</sub> H <sub>34</sub> N <sub>3</sub> O <sub>2</sub> S | 500.2370     | 500.2366 | 0.8        |

582 #37 RT: 0.05 AV: 1 NL: 5.29E6  
T: FTMS + p APCI corona Full ms [120.0000-1000.0000]

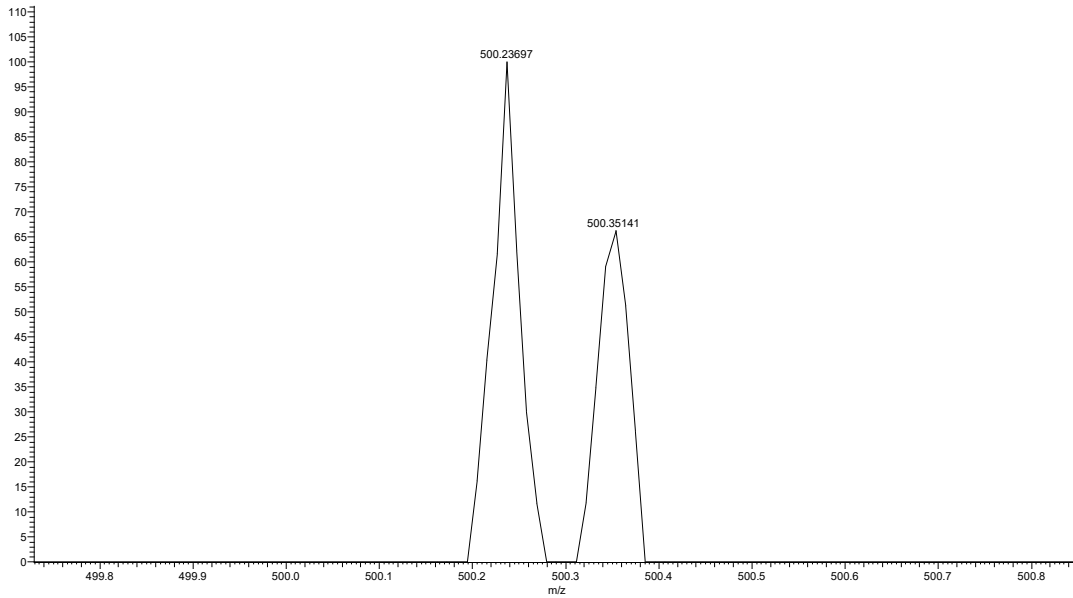

| Sample No.         | Formula (M)                                                                     | Ion Formula                                                                     | Measured m/z | Calc m/z | Diff (ppm) |
|--------------------|---------------------------------------------------------------------------------|---------------------------------------------------------------------------------|--------------|----------|------------|
| 1- <sup>18</sup> O | C <sub>21</sub> H <sub>14</sub> N <sub>2</sub> O <sup>18</sup> O <sub>2</sub> S | C <sub>21</sub> H <sub>15</sub> N <sub>2</sub> O <sup>18</sup> O <sub>2</sub> S | 379.0881     | 379.0883 | -0.53      |

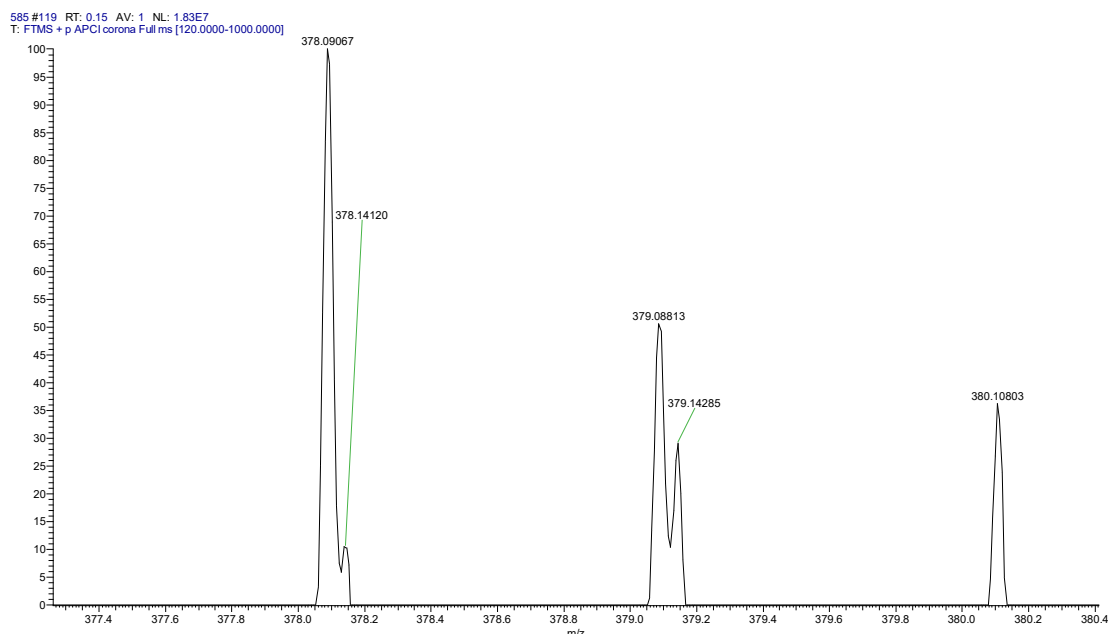

### Crystallographic details

(1) First, the thiocyanated fused cycle **1** was dissolved with the mixture of 1.0 mL dichloromethane (DCM) and 3.0 mL petroleum ether (PE) in a sample bottle, which was sealed/placed on the desk of the laboratory. After some days, the crystal of the final product **1** was precipitated via a volatilizing process.

(2) Single crystal of product **1** [C<sub>21</sub>H<sub>14</sub>N<sub>2</sub>O<sub>3</sub>S] was obtained as follows: A proper crystal was selected and detected on a “Bruker APEX2” diffractometer. The crystal stayed at 293.0 K during data collection. With the help of Shelxtl, the structure was solved with the XShell structure solution program using Charge Flipping, and it was refined with the SHELXL [1] refinement package using Least Squares minimisation. Finally, crystal data and structure refinement parameters of product **1** are performed as depicted in Table S3.

[1]. Sheldrick, G.M. (2015). Acta Cryst. C71, 3-8.

**Table S3.** Crystal data and structure refinement for product **1**.

CCDC 2522354

Displacement ellipsoids are drawn at the 50% probability level

|                                           |                                                                 |
|-------------------------------------------|-----------------------------------------------------------------|
| Empirical formula                         | C <sub>21</sub> H <sub>14</sub> N <sub>2</sub> O <sub>3</sub> S |
| Formula weight                            | 374.40                                                          |
| Temperature/K                             | 293(2)                                                          |
| Crystal system                            | orthorhombic                                                    |
| Space group                               | Pbca                                                            |
| a/Å                                       | 15.719(4)                                                       |
| b/Å                                       | 10.479(3)                                                       |
| c/Å                                       | 21.491(7)                                                       |
| α/°                                       | 90                                                              |
| β/°                                       | 90                                                              |
| γ/°                                       | 90                                                              |
| Volume/Å <sup>3</sup>                     | 3540.3(18)                                                      |
| Z                                         | 8                                                               |
| ρ <sub>calc</sub> /cm <sup>3</sup>        | 1.405                                                           |
| μ/mm <sup>-1</sup>                        | 0.208                                                           |
| F(000)                                    | 1552.0                                                          |
| Radiation                                 | MoKα (λ = 0.71073)                                              |
| 2θ range for data collection/°            | 3.79 to 55.176                                                  |
| Index ranges                              | -18 ≤ h ≤ 20, -13 ≤ k ≤ 13, -27 ≤ l ≤ 27                        |
| Reflections collected                     | 50126                                                           |
| Independent reflections                   | 4064 [R <sub>int</sub> = 0.0813, R <sub>sigma</sub> = 0.0323]   |
| Data/restraints/parameters                | 4064/0/245                                                      |
| Goodness-of-fit on F <sup>2</sup>         | 1.035                                                           |
| Final R indexes [I ≥ 2σ (I)]              | R <sub>1</sub> = 0.0479, wR <sub>2</sub> = 0.1043               |
| Final R indexes [all data]                | R <sub>1</sub> = 0.0831, wR <sub>2</sub> = 0.1216               |
| Largest diff. peak/hole /eÅ <sup>-3</sup> | 0.17/-0.28                                                      |

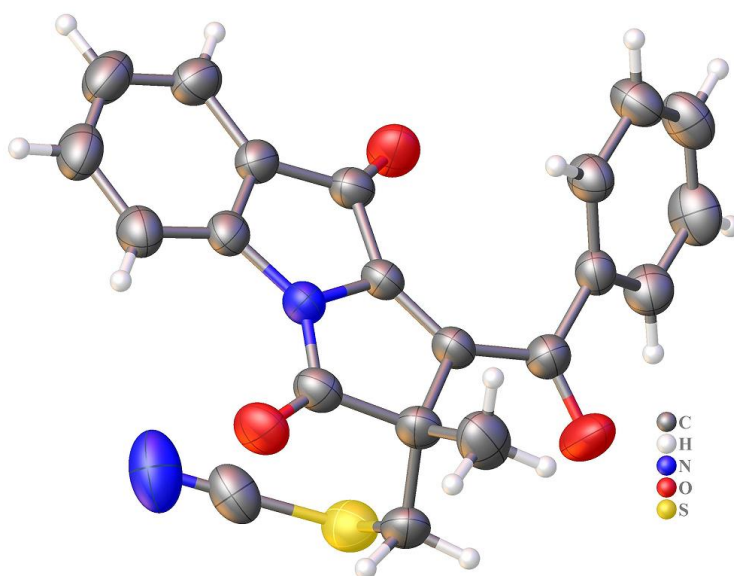

**Fig. S1** Structure of thiocyanated product **1**.

## Luminescence quenching experiments

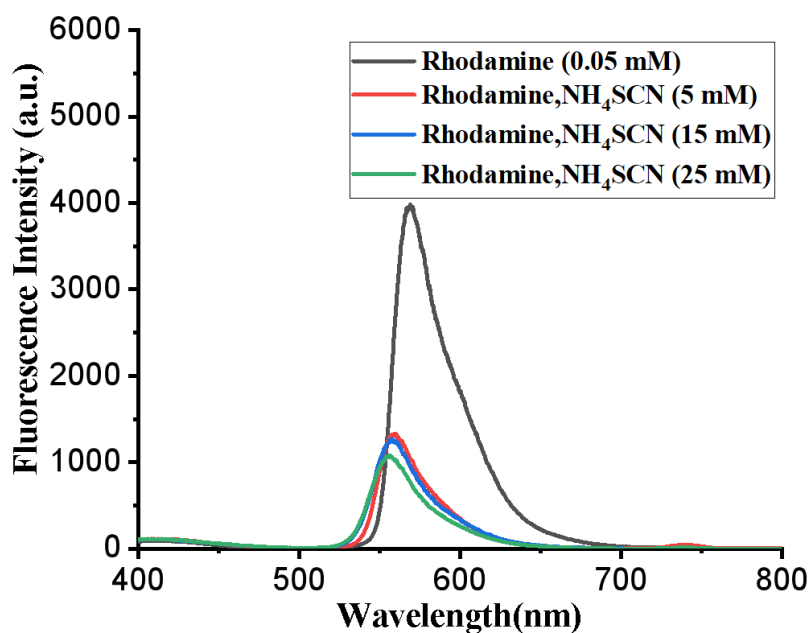

**Figure S2.** Fluorescence quenching of Rhodamine 6G with NH<sub>4</sub>SCN.

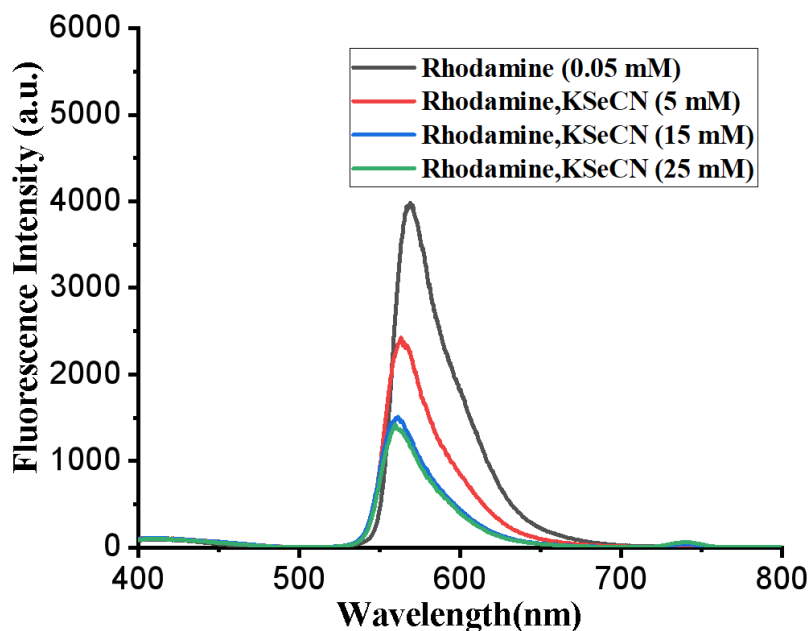

**Figure S3.** Fluorescence quenching of Rhodamine 6G with KSeCN.

Emission intensities were recorded using a HITACHI F7000 photoluminescence spectrometer from 400 nm to 800 nm. After irradiation of  $5 \times 10^{-5}$  M of Rhodamine 6G and different concentrations of quencher in solvent (DCE and CHCl<sub>3</sub>) at 370 nm, its

fluorescence was measured. As shown in Figures S2-S3, the emission intensity of the excited state of photocatalyst Rhodamine 6G is decreased in the presence of  $\text{NH}_4\text{SCN}$  or  $\text{KSeCN}$ .

Physical data and references for the following products

**References:**

1. S. Chen, Q. Yan, J. Fan, Y. Gao, X. Yang, L.-J. Li, Z.-Q. Liu and Z.-J. Li, *Green Chem.*, 2022, **24**, 4742-4747.
2. S. Chen, Q. Yan, J. Fan, C. Guo, L.-J. Li, Z.-Q. Liu and Z.-J. Li, *Green Chem.*, 2023, **25**, 153-160.
3. H.-D. Zuo, X. Chen, Y. Yuan, Y. Zhang, J.-W. Liu, S.-H. Yan, W.-J. Hao and B. Jiang, *Org. Lett.*, 2024, **26**, 3810-3815.
4. H.-D. Zuo, X. Chen, Y. Zhang, J.-W. Liu, S.-H. Yan, G.-G. Li and J.-Y. Wang, *Org. Lett.*, 2024, **26**, 3828-3833.

**Physical data for the following products:**

**2-methyl-1-(2-(phenylethynyl)-1H-indol-1-yl)prop-2-en-1-one (1-s)**

Brown solid after purification by flash column chromatography (petroleum ether/ethyl acetate = 100/1). 0.43g, the overall yield after four steps 30%. (with the initial system scale up to 5 mmol).

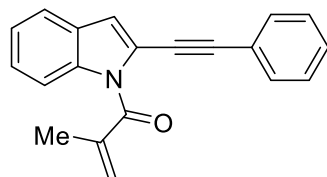

**$^1\text{H}$  NMR (400 MHz,  $\text{CDCl}_3$ ):**  $\delta$  8.14 (d,  $J$  = 8.4 Hz, 1H), 7.58 (d,  $J$  = 8.0 Hz, 1H), 7.51 – 7.49 (m, 2H), 7.41 – 7.37 (m, 4H), 7.30 (t,  $J$  = 7.6 Hz, 1H), 7.00 (s, 1H), 5.76 (s, 1H), 5.60 (s, 1H), 2.27 (s, 3H).

**$^{13}\text{C}$  NMR (100 MHz,  $\text{CDCl}_3$ ):**  $\delta$  170.5, 140.5, 136.8, 131.0, 128.8, 128.7, 128.5, 125.7, 124.6, 123.7, 122.4, 120.7, 120.6, 116.0, 115.1, 97.6, 81.5, 19.2.

**1-benzoyl-2-methyl-2-(thiocyanatomethyl)-3H-pyrrolo[1,2-a]indole-3,9(2H)-dione (1)**

A yellow solid after purification by flash column chromatography (petroleum ether/ethyl acetate = 10/1). 22.8 mg, 61% yield. Mp: 147-148°C

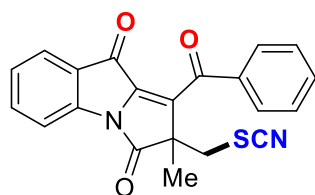

**<sup>1</sup>H NMR (400 MHz, CDCl<sub>3</sub>):** δ 7.95 (d, *J* = 8.0 Hz, 1H), 7.85 (d, *J* = 7.2 Hz, 2H), 7.75 – 7.66 (m, 3H), 7.50 (t, *J* = 7.8 Hz, 2H), 7.30 (t, *J* = 7.6 Hz, 1H), 3.80 (d, *J* = 13.6 Hz, 1H), 3.66 (d, *J* = 13.6 Hz, 1H), 1.73 (s, 3H).

**<sup>13</sup>C NMR (100 MHz, CDCl<sub>3</sub>):** δ 189.8, 177.2, 170.1, 143.2, 141.6, 137.8, 137.6, 133.9, 128.9, 128.6, 128.1, 125.8, 125.8, 124.9, 115.0, 110.7, 61.2, 38.9, 22.5.

**HRMS (ESI, *m/z*):** calcd for C<sub>21</sub>H<sub>14</sub>NaN<sub>2</sub>O<sub>3</sub>S [M + Na]<sup>+</sup>, 397.0617; Measured, 397.0609.

**2-methyl-1-(4-methylbenzoyl)-2-(thiocyanatomethyl)-3H-pyrrolo[1,2-a]indole-3,9(2H)-dione (2)**

A yellow solid after purification by flash column chromatography (petroleum ether/ethyl acetate = 10/1). 18.8 mg, 51% yield. Mp: 127-128°C

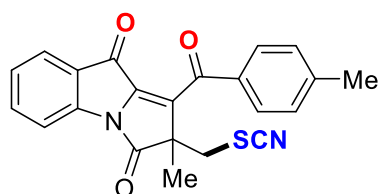

**<sup>1</sup>H NMR (400 MHz, CDCl<sub>3</sub>):** δ 7.97 (d, *J* = 8.4 Hz, 1H), 7.79 – 7.73 (m, 4H), 7.31 (t, *J* = 8.2 Hz, 3H), 3.78 (d, *J* = 13.6 Hz, 1H), 3.68 (d, *J* = 13.6 Hz, 1H), 2.47 (s, 3H), 1.71 (s, 3H).

**<sup>13</sup>C NMR (100 MHz, CDCl<sub>3</sub>):** δ 189.3, 177.5, 170.1, 145.4, 143.3, 141.1, 137.6, 135.1, 129.5, 129.3, 128.2, 125.9, 125.3, 115.2, 110.9, 61.4, 39.2, 22.5, 21.9.

**HRMS (ESI, *m/z*):** calcd for C<sub>22</sub>H<sub>16</sub>NaN<sub>2</sub>O<sub>3</sub>S [M + Na]<sup>+</sup>, 411.0774; Measured, 411.0778.

**2-methyl-1-(3-methylbenzoyl)-2-(thiocyanatomethyl)-3H-pyrrolo[1,2-a]indole-3,9(2H)-dione (3)**

A yellow solid after purification by flash column chromatography (petroleum ether/dichloromethane = 10/1). 15.9 mg, 41% yield. Mp: 158-159°C

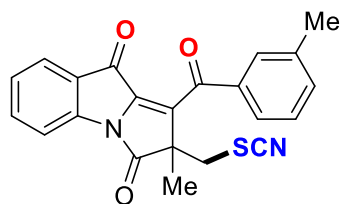

**<sup>1</sup>H NMR (400 MHz, CDCl<sub>3</sub>):** δ 7.97 (d, *J* = 8.0 Hz, 1H), 7.75 (t, *J* = 8.4 Hz, 2H), 7.64 (d, *J* = 12.8 Hz, 2H), 7.49 (d, *J* = 7.6 Hz, 1H), 7.37 (t, *J* = 7.6 Hz, 1H), 7.31 (t, *J* = 7.4 Hz, 1H), 3.81 (d, *J* = 13.6 Hz, 1H), 3.68 (d, *J* = 13.6 Hz, 1H), 2.43 (s, 3H), 1.73 (s, 3H).

**<sup>13</sup>C NMR (100 MHz, CDCl<sub>3</sub>):** δ 190.1, 177.3, 170.2, 143.3, 141.5, 138.7, 137.9, 137.6, 134.9, 129.2, 128.5, 128.2, 126.5, 125.9, 125.2, 115.2, 110.8, 61.3, 39.1, 22.5, 21.4.

**HRMS (ESI, *m/z*):** calcd for C<sub>22</sub>H<sub>16</sub>NaN<sub>2</sub>O<sub>3</sub>S [M + Na]<sup>+</sup>, 411.0774; Measured, 411.0776.

**1-(4-ethylbenzoyl)-2-methyl-2-(thiocyanatomethyl)-3H-pyrrolo[1,2-a]indole-3,9(2H)-dione (4)**

A yellow oil after purification by flash column chromatography (petroleum ether/ethyl acetate = 7/1). 27 mg, 67% yield.

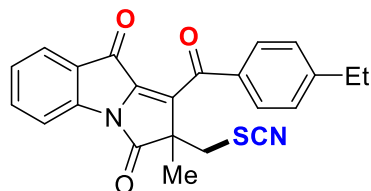

**<sup>1</sup>H NMR (400 MHz, CDCl<sub>3</sub>):** δ 7.97 (d, *J* = 8.4 Hz, 1H), 7.81 (d, *J* = 8.4 Hz, 2H), 7.75 – 7.73 (m, 2H), 7.33 (d, *J* = 8.0 Hz, 3H), 3.78 (d, *J* = 13.6 Hz, 1H), 3.68 (d, *J* = 11.6 Hz, 1H), 2.76 (q, *J* = 8.2 Hz, 2H), 1.70 (s, 3H), 1.31 – 1.25 (m, 3H).

**<sup>13</sup>C NMR (100 MHz, CDCl<sub>3</sub>):** δ 189.3, 177.5, 170.0, 151.5, 143.3, 141.0, 137.6, 135.2, 129.4, 128.3, 125.9, 125.8, 125.6, 125.3, 115.2, 110.9, 61.4, 39.2, 29.1, 22.5, 15.0.

**HRMS (ESI, *m/z*):** calcd for C<sub>23</sub>H<sub>18</sub>NaN<sub>2</sub>O<sub>3</sub>S [M + Na]<sup>+</sup>, 425.0930; Measured, 425.0927.

**1-(4-fluorobenzoyl)-2-methyl-2-(thiocyanatomethyl)-3H-pyrrolo[1,2-a]indole-3,9(2H)-dione (5)**

A yellow solid after purification by flash column chromatography (petroleum ether/ethyl acetate = 10/1). 23.2 mg, 60% yield. Mp: 117-118°C

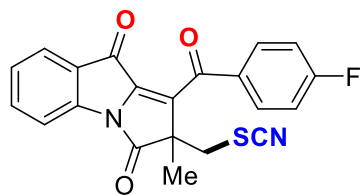

**<sup>1</sup>H NMR (400 MHz, CDCl<sub>3</sub>):** δ 7.97 (d, *J* = 7.6 Hz, 1H), 7.91 – 7.87 (m, 2H), 7.77 – 7.73 (m, 2H), 7.32 (t, *J* = 8.1 Hz, 1H), 7.18 (t, *J* = 8.6 Hz, 2H), 3.80 (d, *J* = 13.6 Hz, 1H), 3.66 (d, *J* = 13.6 Hz, 1H), 1.74 (s, 3H).

**<sup>13</sup>C NMR (100 MHz, CDCl<sub>3</sub>):** δ 188.3, 177.5, 170.2, 166.5 (d, *J* = 255.3 Hz), 143.4, 141.8, 138.4, 134.3, 132.8, 131.9 (d, *J* = 9.5 Hz), 128.2, 126.0 (d, *J* = 6.3 Hz), 124.9, 116.2, 115.3, 110.7, 61.5, 39.0, 22.8.

**<sup>19</sup>F NMR (565 MHz, CDCl<sub>3</sub>):** δ -103.08 (s, 1F)

**HRMS (ESI, *m/z*):** calcd for C<sub>21</sub>H<sub>13</sub>FNaN<sub>2</sub>O<sub>3</sub>S [M + Na]<sup>+</sup>, 415.0523; Measured, 415.0529.

**1-(4-chlorobenzoyl)-2-methyl-2-(thiocyanatomethyl)-3H-pyrrolo[1,2-a]indole-3,9(2H)-dione (6)**

A yellow solid after purification by flash column chromatography (petroleum ether/ethyl acetate = 10/1). 20.7 mg, 51% yield. Mp: 146-147°C

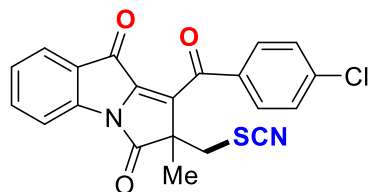

**<sup>1</sup>H NMR (400 MHz, CDCl<sub>3</sub>):** δ 7.96 (d, *J* = 8.0 Hz, 1H), 7.77 (dd, *J* = 17.2, 8.4 Hz, 4H), 7.47 (d, *J* = 6.8 Hz, 2H), 7.33 (t, *J* = 7.8 Hz, 1H), 3.80 (d, *J* = 14.8 Hz, 1H), 3.66 (d, *J* = 13.2 Hz, 1H), 1.74 (s, 3H).

**<sup>13</sup>C NMR (100 MHz, CDCl<sub>3</sub>):** δ 188.5, 177.4, 170.1, 143.3, 141.9, 140.6, 137.8, 136.2, 130.9, 129.1, 128.0, 126.1, 126.0, 124.5, 115.2, 110.6, 61.4, 38.9, 22.8.

**HRMS (ESI, *m/z*):** calcd for C<sub>21</sub>H<sub>13</sub>ClNaN<sub>2</sub>O<sub>3</sub>S [M + Na]<sup>+</sup>, 431.0228; Measured, 431.0227.

**1-(4-bromobenzoyl)-2-methyl-2-(thiocyanatomethyl)-3H-pyrrolo[1,2-a]indole-3,9(2H)-dione (7)**

A yellow oil after purification by flash column chromatography (petroleum ether/ethyl

acetate = 10/1). 28.1 mg, 62% yield.

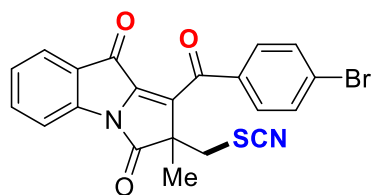

**<sup>1</sup>H NMR (400 MHz, CDCl<sub>3</sub>):** δ 7.96 (d, *J* = 8.4 Hz, 1H), 7.78 – 7.70 (m, 4H), 7.64 (d, *J* = 6.8 Hz, 2H), 7.33 (t, *J* = 8.2 Hz, 1H), 3.80 (d, *J* = 13.6 Hz, 1H), 3.66 (d, *J* = 13.6 Hz, 1H), 1.74 (s, 3H).

**<sup>13</sup>C NMR (100 MHz, CDCl<sub>3</sub>):** δ 188.7, 177.4, 170.1, 143.3, 142.0, 137.8, 136.6, 132.0, 130.4, 129.5, 129.4, 128.0, 126.1, 124.5, 115.2, 110.6, 61.4, 38.8, 22.8.

**HRMS (ESI, *m/z*):** calcd for C<sub>21</sub>H<sub>14</sub>BrN<sub>2</sub>O<sub>3</sub>S [M + H]<sup>+</sup>, 452.9903; Measured, 452.9894

**2-methyl-2-(thiocyanatomethyl)-1-(4-(trifluoromethyl)benzoyl)-3H-pyrrolo[1,2-a]indole-3,9(2H)-dione (8)**

A yellow solid after purification by flash column chromatography (petroleum ether/ethyl acetate = 10/1). 28 mg, 63% yield. Mp: 143-144 °C

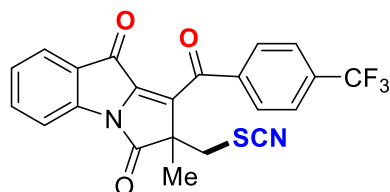

**<sup>1</sup>H NMR (400 MHz, CDCl<sub>3</sub>):** δ 7.96 (d, *J* = 8.0 Hz, 1H), 7.92 (d, *J* = 8.4 Hz, 2H), 7.77 – 7.72 (m, 4H), 7.33 (t, *J* = 7.6 Hz, 1H), 3.85 (d, *J* = 14.0 Hz, 1H), 3.64 (d, *J* = 13.6 Hz, 1H), 1.77 (s, 3H).

**<sup>13</sup>C NMR (100 MHz, CDCl<sub>3</sub>):** δ 189.0, 177.2, 170.2, 143.0 (q, *J* = 56.9 Hz), 141.0, 137.9, 136.2, 129.1, 126.2, 126.1, 126.0 (q, *J* = 278.6 Hz), 125.7, 125.6, 115.2, 110.5, 61.4, 38.7, 22.9.

**<sup>19</sup>F NMR (565 MHz, CDCl<sub>3</sub>):** δ -62.99 (s, 3F)

**HRMS (ESI, *m/z*):** calcd for C<sub>22</sub>H<sub>13</sub>F<sub>3</sub>NaN<sub>2</sub>O<sub>3</sub>S [M + Na]<sup>+</sup>, 465.0491; Measured, 465.0494.

**4-(2-methyl-3,9-dioxo-2-(thiocyanatomethyl)-2,9-dihydro-3H-pyrrolo[1,2-a]indole-1-carbonyl)benzotrile (9)**

A yellow solid after purification by flash column chromatography (petroleum

ether/ethyl acetate = 10/1). 20 mg, 50% yield. Mp: 165-166 °C

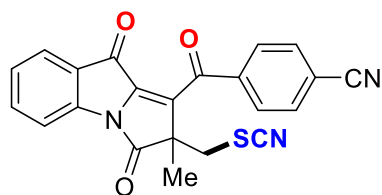

**<sup>1</sup>H NMR (400 MHz, CDCl<sub>3</sub>):** δ 7.95 (d, *J* = 8.0 Hz, 1H), 7.87 (d, *J* = 8.8 Hz, 2H), 7.80 – 7.76 (m, 3H), 7.74 – 7.71 (m, 1H), 7.34 (t, *J* = 7.6 Hz, 1H), 3.86 (d, *J* = 14.0 Hz, 1H), 3.61 (d, *J* = 14.0 Hz, 1H), 1.78 (s, 3H).

**<sup>13</sup>C NMR (100 MHz, CDCl<sub>3</sub>):** δ 188.7, 177.2, 170.3, 143.3, 141.7, 138.0, 132.4, 130.9, 129.0, 127.8, 126.3, 126.1, 123.9, 118.0, 116.5, 115.2, 110.5, 61.4, 38.5, 23.1.

**HRMS (ESI, *m/z*):** calcd for C<sub>22</sub>H<sub>14</sub>O<sub>3</sub>N<sub>3</sub>S [M + H]<sup>+</sup>, 400.0750; Measured, 400.0742.

**methyl 4-(2-methyl-3,9-dioxo-2-(thiocyanatomethyl)-2,9-dihydro-3H-pyrrolo[1,2-a]indole-1-carbonyl)benzoate (10)**

A yellow solid after purification by flash column chromatography (petroleum ether/ethyl acetate = 8/1). 25.6 mg, 60% yield. Mp: 116-117 °C

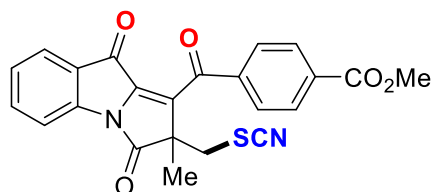

**<sup>1</sup>H NMR (400 MHz, CDCl<sub>3</sub>):** δ 8.16 (d, *J* = 8.4 Hz, 2H), 7.96 (d, *J* = 8.0 Hz, 1H), 7.86 (d, *J* = 8.4 Hz, 2H), 7.77 – 7.70 (m, 2H), 7.32 (t, *J* = 7.6 Hz, 1H), 3.96 (s, 3H), 3.85 (d, *J* = 13.6 Hz, 1H), 3.66 (d, *J* = 13.6 Hz, 1H), 1.77 (s, 3H).

**<sup>13</sup>C NMR (100 MHz, CDCl<sub>3</sub>):** δ 189.5, 177.2, 170.2, 166.1, 143.3, 142.6, 141.6, 137.8, 134.2, 129.9, 128.6, 128.0, 126.1, 126.0, 124.4, 115.2, 110.6, 61.3, 52.5, 38.7, 22.8.

**HRMS (ESI, *m/z*):** calcd for C<sub>23</sub>H<sub>16</sub>NaN<sub>2</sub>O<sub>5</sub>S [M + Na]<sup>+</sup>, 455.0672; Measured, 455.0677.

**2-methyl-1-(4-nitrobenzoyl)-2-(thiocyanatomethyl)-3H-pyrrolo[1,2-a]indole-3,9(2H)-dione (11)**

A yellow solid after purification by flash column chromatography (petroleum ether/ethyl acetate = 5/1). 20 mg, 48% yield. Mp: 104-105 °C

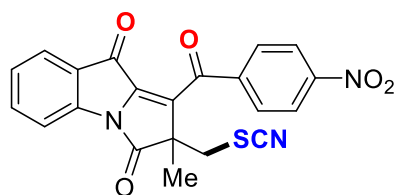

**<sup>1</sup>H NMR (400 MHz, CDCl<sub>3</sub>):** δ 8.34 (d, *J* = 9.2 Hz, 2H), 7.96 – 7.91 (m, 3H), 7.76 (t, *J* = 8.2 Hz, 1H), 7.71 (d, *J* = 6.8 Hz, 1H), 7.34 (t, *J* = 7.6 Hz, 1H), 3.89 (d, *J* = 13.6 Hz, 1H), 3.61 (d, *J* = 14.0 Hz, 1H), 1.80 (s, 3H).

**<sup>13</sup>C NMR (100 MHz, CDCl<sub>3</sub>):** δ 188.5, 177.2, 170.3, 150.3, 143.5, 143.4, 143.3, 138.0, 129.5, 128.8, 127.7, 126.4, 126.2, 123.9, 115.2, 110.5, 61.4, 38.4, 23.1.

**HRMS (ESI, *m/z*):** calcd for C<sub>21</sub>H<sub>14</sub>N<sub>3</sub>O<sub>5</sub>S [M + H]<sup>+</sup>, 420.0649; Measured, 420.0642.

**1-(4-methoxybenzoyl)-2-methyl-2-(thiocyanatomethyl)-3H-pyrrolo[1,2-a]indole-3,9(2H)-dione (12)**

A yellow solid after purification by flash column chromatography (petroleum ether/ethyl acetate = 7/1). 18.5 mg, 46% yield. Mp: 124-125°C

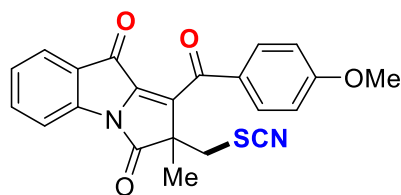

**<sup>1</sup>H NMR (400 MHz, CDCl<sub>3</sub>):** δ 7.98 (d, *J* = 8.4 Hz, 1H), 7.89 (d, *J* = 7.2 Hz, 2H), 7.76 (d, *J* = 6.8 Hz, 2H), 7.32 (t, *J* = 7.6 Hz, 1H), 6.97 (d, *J* = 8.8 Hz, 2H), 3.91 (s, 3H), 3.76 (d, *J* = 13.2 Hz, 1H), 3.68 (d, *J* = 13.6 Hz, 1H), 1.70 (s, 3H).

**<sup>13</sup>C NMR (100 MHz, CDCl<sub>3</sub>):** δ 187.8, 177.6, 170.0, 164.7, 143.3, 140.4, 137.6, 131.8, 130.3, 128.3, 125.8, 125.6, 115.2, 114.0, 111.1, 61.5, 55.6, 39.3, 22.4.

**HRMS (ESI, *m/z*):** calcd for C<sub>22</sub>H<sub>16</sub>NaN<sub>2</sub>O<sub>4</sub>S [M + Na]<sup>+</sup>, 427.0723; Measured, 427.0728.

**1-([1,1'-biphenyl]-4-carbonyl)-2-methyl-2-(thiocyanatomethyl)-3H-pyrrolo[1,2-a]indole-3,9(2H)-dione (13)**

A yellow solid after purification by flash column chromatography (petroleum ether/ethyl acetate = 8/1). 27.4 mg, 61% yield. Mp: 159-160°C

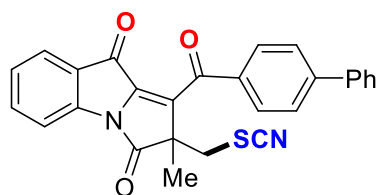

**<sup>1</sup>H NMR (400 MHz, CDCl<sub>3</sub>):** δ 8.00 – 7.95 (m, 3H), 7.78 – 7.72 (m, 4H), 7.68 (d, *J* = 7.6 Hz, 2H), 7.48 (t, *J* = 7.4 Hz, 2H), 7.42 (d, *J* = 7.2 Hz, 1H), 7.32 (t, *J* = 7.6 Hz, 1H), 3.81 (d, *J* = 13.6 Hz, 1H), 3.70 (d, *J* = 13.6 Hz, 1H), 1.75 (s, 3H).

**<sup>13</sup>C NMR (100 MHz, CDCl<sub>3</sub>):** δ 189.2, 177.4, 170.1, 146.8, 143.4, 141.3, 139.6, 137.7, 136.3, 129.8, 128.9, 128.4, 128.2, 127.4, 127.3, 125.9, 125.1, 115.2, 110.8, 61.5, 39.1, 22.6.

**HRMS (ESI, *m/z*):** calcd for C<sub>27</sub>H<sub>18</sub>NaN<sub>2</sub>O<sub>3</sub>S [M + H]<sup>+</sup>, 473.0930; Measured, 473.0931.

**1-(4-(tert-butyl)benzoyl)-2-methyl-2-(thiocyanatomethyl)-3H-pyrrolo[1,2-a]indole-3,9(2H)-dione (14)**

A yellow solid after purification by flash column chromatography (petroleum ether/dichloromethane = 10/1). 22 mg, 51% yield. Mp: 120-121 °C

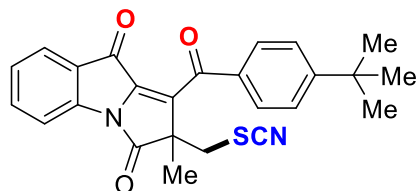

**<sup>1</sup>H NMR (400 MHz, CDCl<sub>3</sub>):** δ 7.98 (d, *J* = 8.0 Hz, 1H), 7.84 (d, *J* = 8.4 Hz, 2H), 7.77 – 7.73 (m, 2H), 7.51 (d, *J* = 8.4 Hz, 2H), 7.32 (t, *J* = 7.6 Hz, 1H), 3.77 (d, *J* = 13.6 Hz, 1H), 3.68 (d, *J* = 13.6 Hz, 1H), 1.70 (s, 3H), 1.37 (s, 9H).

**<sup>13</sup>C NMR (100 MHz, CDCl<sub>3</sub>):** δ 189.2, 177.4, 170.0, 158.3, 143.3, 140.7, 137.6, 134.7, 129.3, 128.3, 125.8, 125.8, 125.7, 125.3, 115.2, 110.9, 61.5, 39.2, 35.3, 31.0, 22.4.

**HRMS (ESI, *m/z*):** calcd for C<sub>25</sub>H<sub>22</sub>NaN<sub>2</sub>O<sub>3</sub>S [M + Na]<sup>+</sup>, 453.1243; Measured, 453.1257.

**2-methyl-1-nicotinoyl-2-(thiocyanatomethyl)-3H-pyrrolo[1,2-a]indole-3,9(2H)-dione (15)**

A yellow solid after purification by flash column chromatography (petroleum ether/ethyl acetate = 5/1). 15 mg, 40% yield. Mp: 120-121 °C

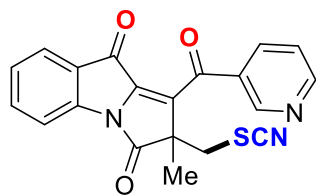

**<sup>1</sup>H NMR (400 MHz, CDCl<sub>3</sub>):** δ 8.58 (d, *J* = 4.8 Hz, 1H), 7.96 – 7.89 (m, 3H), 7.78 – 7.69 (m, 2H), 7.58 – 7.58 (m, 1H), 7.30 (t, *J* = 7.8 Hz, 1H), 3.98 (d, *J* = 13.6 Hz, 1H), 3.61 (d, *J* = 13.2 Hz, 1H), 1.76 (s, 3H).

**<sup>13</sup>C NMR (100 MHz, CDCl<sub>3</sub>):** δ 189.6, 177.3, 170.4, 155.0, 149.1, 143.5, 143.2, 137.4, 137.1, 128.2, 127.3, 125.9, 125.8, 123.3, 122.7, 115.1, 110.9, 60.9, 39.3, 21.8.

**HRMS (ESI, *m/z*):** calcd for C<sub>20</sub>H<sub>13</sub>NaN<sub>3</sub>O<sub>3</sub>S [M + Na]<sup>+</sup>, 398.0570; Measured, 398.0567.

**1-benzoyl-7-fluoro-2-methyl-2-(thiocyanatomethyl)-3H-pyrrolo[1,2-a]indole-3,9(2H)-dione (16)**

A yellow solid after purification by flash column chromatography (petroleum ether/dichloromethane = 1/1). 24.5 mg, 63% yield. Mp: 153-154 °C

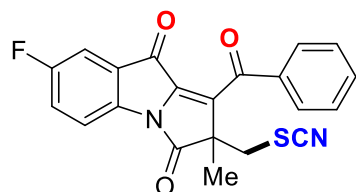

**<sup>1</sup>H NMR (400 MHz, CDCl<sub>3</sub>):** δ 7.96 (dd, *J* = 8.8, 4.0 Hz, 1H), 7.84 (d, *J* = 7.6 Hz, 2H), 7.72 – 7.68 (m, 1H), 7.53 – 7.44 (m, 3H), 7.39 (dd, *J* = 7.0, 3.0 Hz, 1H), 3.79 (d, *J* = 13.6 Hz, 1H), 3.68 (d, *J* = 13.2 Hz, 1H), 1.74 (s, 3H).

**<sup>13</sup>C NMR (100 MHz, CDCl<sub>3</sub>):** δ 189.7, 176.4, 169.8, 160.2 (d, *J* = 247.8 Hz), 141.6, 139.7, 137.8, 134.1, 130.9, 128.9 (d, *J* = 15.4 Hz), 125.9, 124.9 (d, *J* = 24.9 Hz), 116.6 (d, *J* = 7.9 Hz), 112.1 (d, *J* = 24.1 Hz), 110.6, 61.4, 39.0, 22.6.

**<sup>19</sup>F NMR (565 MHz, CDCl<sub>3</sub>):** δ -113.62 (s, 1F)

**HRMS (ESI, *m/z*):** calcd for C<sub>21</sub>H<sub>13</sub>FNaN<sub>2</sub>O<sub>3</sub>S [M + Na]<sup>+</sup>, 415.0523; Measured, 415.0521.

**1-benzoyl-7-chloro-2-methyl-2-(thiocyanatomethyl)-3H-pyrrolo[1,2-a]indole-3,9(2H)-dione (17)**

A yellow solid after purification by flash column chromatography (petroleum

ether/dichloromethane = 1/1). 27.8 mg, 71% yield. Mp: 191-192°C

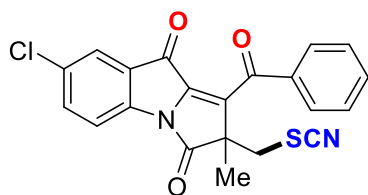

**<sup>1</sup>H NMR (400 MHz, CDCl<sub>3</sub>):** δ 7.92 (d, *J* = 8.4 Hz, 1H), 7.84 (d, *J* = 8.4 Hz, 2H), 7.71 – 7.68 (m, 3H), 7.51 (t, *J* = 7.8 Hz, 2H), 3.78 (d, *J* = 13.6 Hz, 1H), 3.69 (d, *J* = 13.6 Hz, 1H), 1.74 (s, 3H).

**<sup>13</sup>C NMR (100 MHz, CDCl<sub>3</sub>):** δ 189.7, 176.1, 169.9, 141.6, 141.3, 137.7, 137.4, 134.1, 131.9, 129.2, 128.9, 128.8, 125.8, 125.7, 116.3, 110.6, 61.4, 39.0, 22.6.

**HRMS (ESI, *m/z*):** calcd for C<sub>21</sub>H<sub>13</sub>ClNaN<sub>2</sub>O<sub>3</sub>S [M + Na]<sup>+</sup>, 431.0228; Measured, 431.0229.

### 1-benzoyl-6-chloro-2-methyl-2-(thiocyanatomethyl)-3H-pyrrolo[1,2-a]indole-3,9(2H)-dione (18)

A yellow solid after purification by flash column chromatography (petroleum ether/ethyl acetate = 10/1). 28.5 mg, 70% yield. Mp: 185-186°C

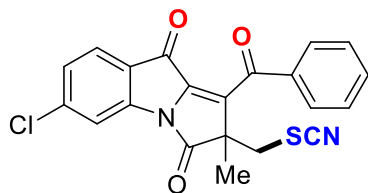

**<sup>1</sup>H NMR (400 MHz, CDCl<sub>3</sub>):** δ 7.98 (d, *J* = 1.6 Hz, 1H), 7.84 (d, *J* = 6.8 Hz, 2H), 7.70 – 7.64 (m, 2H), 7.51 (t, *J* = 7.8 Hz, 2H), 7.29 – 7.26 (m, 1H), 3.79 (d, *J* = 13.6 Hz, 1H), 3.68 (d, *J* = 13.6 Hz, 1H), 1.74 (s, 3H).

**<sup>13</sup>C NMR (100 MHz, CDCl<sub>3</sub>):** δ 189.7, 176.0, 170.1, 144.3, 143.7, 141.5, 137.8, 134.1, 129.5, 128.9, 128.7, 126.8, 126.5, 125.5, 115.6, 110.6, 61.4, 38.9, 22.7.

**HRMS (ESI, *m/z*):** calcd for C<sub>21</sub>H<sub>13</sub>BrNaN<sub>2</sub>O<sub>3</sub>S [M + Na]<sup>+</sup>, 431.0228; Measured, 431.0232.

### 1-benzoyl-7-bromo-2-methyl-2-(thiocyanatomethyl)-3H-pyrrolo[1,2-a]indole-3,9(2H)-dione (19)

A yellow solid after purification by flash column chromatography (petroleum ether/dichloromethane = 1/1). 29 mg, 64% yield. Mp: 191-192°C

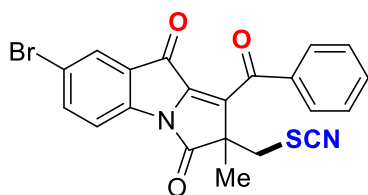

**<sup>1</sup>H NMR (400 MHz, CDCl<sub>3</sub>):** δ 7.84 (d, *J* = 7.2 Hz, 5H), 7.70 (t, *J* = 7.6 Hz, 1H), 7.51 (t, *J* = 7.8 Hz, 2H), 3.78 (d, *J* = 13.6 Hz, 1H), 3.69 (d, *J* = 13.2 Hz, 1H), 1.74 (s, 3H).

**<sup>13</sup>C NMR (100 MHz, CDCl<sub>3</sub>):** δ 189.7, 176.0, 169.9, 141.9, 141.1, 140.2, 137.6, 134.2, 129.5, 128.9, 128.8, 128.7, 125.6, 119.2, 116.6, 110.6, 61.4, 38.9, 22.6.

**HRMS (ESI, *m/z*):** calcd for C<sub>21</sub>H<sub>13</sub>BrNaN<sub>2</sub>O<sub>3</sub>S [M + Na]<sup>+</sup>, 476.9704; Measured, 476.9701.

**1-benzoyl-2-methyl-2-(thiocyanatomethyl)-2,3-dihydro-9H-pyrrolo[1,2-a]indol-9-one (20)**

A purple oil after purification by flash column chromatography (petroleum ether/ethyl acetate = 8/1). 11 mg, 30% yield.

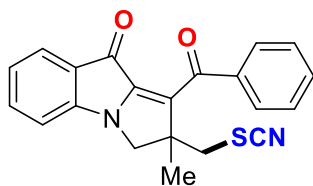

**<sup>1</sup>H NMR (400 MHz, CDCl<sub>3</sub>):** δ 7.75 (d, *J* = 7.2 Hz, 2H), 7.61 (t, *J* = 7.4 Hz, 1H), 7.54 – 7.43 (m, 4H), 6.93 (t, *J* = 7.6 Hz, 1H), 6.81 (d, *J* = 8.0 Hz, 1H), 4.16 (d, *J* = 10.4 Hz, 1H), 3.82 (d, *J* = 13.2 Hz, 1H), 3.74 (d, *J* = 10.4 Hz, 1H), 3.55 (d, *J* = 13.6 Hz, 1H), 1.69 (s, 3H).

**<sup>13</sup>C NMR (100 MHz, CDCl<sub>3</sub>):** δ 191.8, 179.8, 150.2, 147.3, 139.6, 137.3, 132.9, 128.6, 128.4, 125.9, 125.2, 121.2, 120.5, 113.2, 109.9, 57.0, 54.4, 42.9, 24.8.

**HRMS (ESI, *m/z*):** calcd for C<sub>21</sub>H<sub>16</sub>NaN<sub>2</sub>O<sub>2</sub>S [M + Na]<sup>+</sup>, 383.0825; Measured, 383.0823.

**1-benzoyl-2-phenyl-2-(thiocyanatomethyl)-3H-pyrrolo[1,2-a]indole-3,9(2H)-dione (21)**

A yellow oil after purification by flash column chromatography (petroleum ether/ethyl acetate = 10/1). 18 mg, 41% yield.

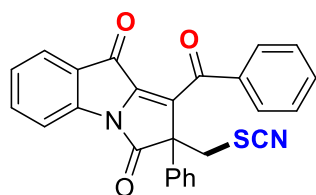

**<sup>1</sup>H NMR (400 MHz, CDCl<sub>3</sub>):** δ 8.02 (d, *J* = 8.0 Hz, 1H), 7.85 (d, *J* = 7.2 Hz, 2H), 7.78 – 7.73 (m, 2H), 7.68 (t, *J* = 7.4 Hz, 1H), 7.50 (d, *J* = 8.4 Hz, 2H), 7.47 – 7.44 (m, 2H), 7.39 – 7.34 (m, 3H), 7.32 (d, *J* = 7.6 Hz, 1H), 4.37 (d, *J* = 13.6 Hz, 1H), 4.09 (d, *J* = 13.2 Hz, 1H).

**<sup>13</sup>C NMR (100 MHz, CDCl<sub>3</sub>):** δ 190.0, 177.3, 168.5, 143.4, 142.1, 137.7, 137.5, 135.5, 134.2, 129.6, 129.3, 129.2, 128.8, 128.3, 126.3, 126.1, 125.9, 124.4, 115.3, 111.1, 68.5, 40.0.

**HRMS (ESI, *m/z*):** calcd for C<sub>26</sub>H<sub>16</sub>NaN<sub>2</sub>O<sub>3</sub>S [M + Na]<sup>+</sup>, 459.0774; Measured, 459.0771.

**1-benzoyl-2-methyl-2-(selenocyanatomethyl)-3H-pyrrolo[1,2-a]indole-3,9(2H)-dione (22)**

A yellow solid after purification by flash column chromatography (petroleum ether/ethyl acetate = 8/1). 18 mg, 43% yield. Mp: 98-99°C

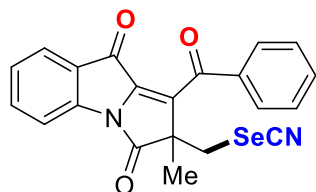

**<sup>1</sup>H NMR (400 MHz, CDCl<sub>3</sub>):** δ 7.97 (d, *J* = 8.0 Hz, 1H), 7.87 (d, *J* = 7.2 Hz, 2H), 7.77 – 7.68 (m, 3H), 7.52 (t, *J* = 7.8 Hz, 2H), 7.31 (t, *J* = 7.6 Hz, 1H), 3.76 (s, 2H), 1.75 (s, 3H).

**<sup>13</sup>C NMR (100 MHz, CDCl<sub>3</sub>):** δ 190.3, 177.5, 170.4, 143.4, 140.9, 137.7, 137.5, 134.3, 129.2, 128.8, 128.2, 126.1, 125.9, 115.2, 101.0, 61.1, 33.9, 22.9.

**HRMS (ESI, *m/z*):** calcd for C<sub>21</sub>H<sub>15</sub>N<sub>2</sub>O<sub>3</sub>Se [M + H]<sup>+</sup>, 423.0242; Measured, 423.0233.

**2-methyl-1-(4-methylbenzoyl)-2-(selenocyanatomethyl)-3H-pyrrolo[1,2-a]indole-3,9(2H)-dione (23)**

A yellow oil after purification by flash column chromatography (petroleum ether/ethyl acetate = 8/1). 16 mg, 37% yield.

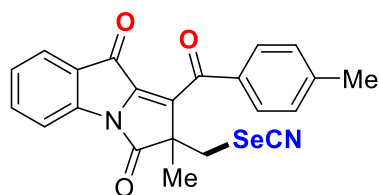

**<sup>1</sup>H NMR (400 MHz, CDCl<sub>3</sub>):** δ 7.97 (d, *J* = 8.4 Hz, 1H), 7.80 (d, *J* = 8.0 Hz, 2H), 7.77 – 7.73 (m, 2H), 7.33 – 7.30 (m, 3H), 3.76 (d, *J* = 12.4 Hz, 1H), 3.72 (d, *J* = 12.4 Hz, 1H), 2.47 (s, 3H), 1.72 (s, 3H).

**<sup>13</sup>C NMR (100 MHz, CDCl<sub>3</sub>):** δ 189.7, 177.6, 170.3, 145.8, 143.4, 140.2, 137.6, 134.7, 129.6, 129.5, 128.3, 126.5, 125.8, 115.2, 101.3, 61.1, 34.0, 22.8, 22.0.

**HRMS (ESI, *m/z*):** calcd for C<sub>22</sub>H<sub>17</sub>N<sub>2</sub>O<sub>3</sub>Se [M + H]<sup>+</sup>, 437.0399; Measured, 437.0392.

**2-methyl-1-(3-methylbenzoyl)-2-(selenocyanatomethyl)-3H-pyrrolo[1,2-a]indole-3,9(2H)-dione (24)**

A yellow solid after purification by flash column chromatography (petroleum ether/ethyl acetate = 8/1). 19 mg, 44% yield. Mp: 103-104 °C

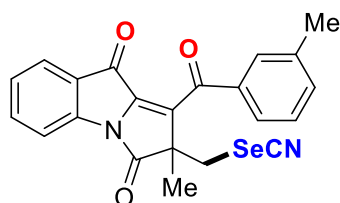

**<sup>1</sup>H NMR (400 MHz, CDCl<sub>3</sub>):** δ 7.97 (d, *J* = 7.6 Hz, 1H), 7.76 – 7.72 (m, 2H), 7.68 – 7.65 (m, 2H), 7.50 (d, *J* = 8.0 Hz, 1H), 7.38 (t, *J* = 7.8 Hz, 1H), 7.31 (t, *J* = 7.6 Hz, 1H), 3.75 (s, 2H), 2.43 (s, 3H), 1.74 (s, 3H).

**<sup>13</sup>C NMR (100 MHz, CDCl<sub>3</sub>):** δ 190.4, 177.4, 170.3, 143.4, 140.6, 138.8, 137.6, 137.5, 135.2, 129.3, 128.6, 128.3, 126.7, 126.3, 125.8, 115.2, 101.1, 61.0, 34.0, 22.9, 21.4.

**HRMS (ESI, *m/z*):** calcd for C<sub>22</sub>H<sub>17</sub>N<sub>2</sub>O<sub>3</sub>Se [M + H]<sup>+</sup>, 437.0399; Measured, 437.0391.

**1-(4-ethylbenzoyl)-2-methyl-2-(selenocyanatomethyl)-3H-pyrrolo[1,2-a]indole-3,9(2H)-dione (25)**

A yellow oil after purification by flash column chromatography (petroleum ether/ethyl acetate = 8/1). 20 mg, 45% yield.

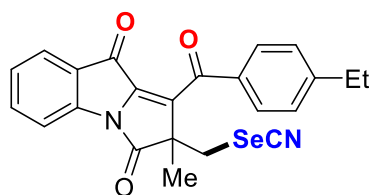

**<sup>1</sup>H NMR (400 MHz, CDCl<sub>3</sub>):** δ 7.97 (d, *J* = 8.4 Hz, 1H), 7.83 (d, *J* = 8.4 Hz, 2H), 7.75 (t, *J* = 8.0 Hz, 2H), 7.34 – 7.29 (m, 3H), 3.76 (d, *J* = 12.4 Hz, 1H), 3.71 (d, *J* = 12.4 Hz, 1H), 2.77 (q, *J* = 7.8 Hz, 2H), 1.71 (s, 3H), 1.31 – 1.25 (m, 3H).

**<sup>13</sup>C NMR (100 MHz, CDCl<sub>3</sub>):** δ 189.7, 177.6, 170.3, 151.9, 143.4, 140.0, 137.6, 134.8, 129.6, 128.4, 128.3, 126.5, 125.8, 125.7, 115.2, 101.3, 61.1, 34.0, 29.1, 22.8, 14.9.

**HRMS (ESI, *m/z*):** calcd for C<sub>23</sub>H<sub>18</sub>NaN<sub>2</sub>O<sub>3</sub>Se [M + Na]<sup>+</sup>, 473.0376; Measured, 473.0375.

**1-(4-fluorobenzoyl)-2-methyl-2-(selenocyanatomethyl)-3H-pyrrolo[1,2-a]indole-3,9(2H)-dione (26)**

A yellow solid after purification by flash column chromatography (petroleum ether/ethyl acetate = 8/1). 24.3 mg, 55% yield. Mp: 135-136°C

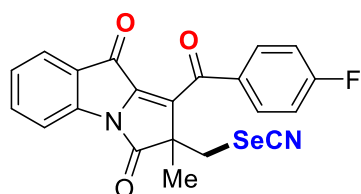

**<sup>1</sup>H NMR (400 MHz, CDCl<sub>3</sub>):** δ 7.97 (d, *J* = 8.0 Hz, 1H), 7.93 – 7.90 (m, 2H), 7.75 (t, *J* = 8.6 Hz, 2H), 7.32 (t, *J* = 7.4 Hz, 1H), 7.18 (t, *J* = 8.6 Hz, 2H), 3.75 (s, 2H), 1.75 (s, 3H).

**<sup>13</sup>C NMR (100 MHz, CDCl<sub>3</sub>):** δ 188.5, 177.5, 170.3, 166.6 (d, *J* = 256.1 Hz), 143.4, 140.9, 137.8, 133.9, 132.0 (d, *J* = 9.7 Hz), 129.5, 128.1, 125.9 (d, *J* = 6.5 Hz), 116.0 (d, *J* = 22.1 Hz), 115.2, 100.8, 61.1, 33.8, 23.0.

**<sup>19</sup>F NMR (565 MHz, CDCl<sub>3</sub>):** δ -102.40 (s, 1F)

**HRMS (ESI, *m/z*):** calcd for C<sub>21</sub>H<sub>13</sub>FNaN<sub>2</sub>O<sub>3</sub>Se [M + Na]<sup>+</sup>, 462.9969; Measured, 462.9966.

**methyl-4-(2-methyl-3,9-dioxo-2-(selenocyanatomethyl)-2,9-dihydro-3H-pyrrolo[1,2-a]indole-1-carbonyl)benzoate (27)**

A yellow oil after purification by flash column chromatography (petroleum ether/ethyl

acetate = 8/1). 25 mg, 52% yield.

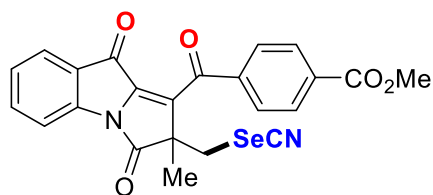

**<sup>1</sup>H NMR (400 MHz, CDCl<sub>3</sub>):** δ 8.16 (d, *J* = 8.4 Hz, 2H), 7.96 (d, *J* = 8.0 Hz, 1H), 7.88 (d, *J* = 8.4 Hz, 2H), 7.77 – 7.70 (m, 2H), 7.32 (t, *J* = 7.6 Hz, 1H), 3.96 (s, 3H), 3.82 (d, *J* = 12.8 Hz, 1H), 3.74 (d, *J* = 12.8 Hz, 1H), 1.78 (s, 3H).

**<sup>13</sup>C NMR (100 MHz, CDCl<sub>3</sub>):** δ 189.8, 177.3, 170.4, 166.1, 143.3, 141.8, 141.2, 137.8, 134.4, 129.9, 128.8, 128.0, 126.1, 126.0, 125.4, 115.2, 100.6, 61.0, 52.5, 33.6, 23.1.

**HRMS (ESI, *m/z*):** calcd for C<sub>23</sub>H<sub>17</sub>N<sub>2</sub>O<sub>5</sub>Se [M + H]<sup>+</sup>, 481.0297; Measured, 481.0289.

**1-([1,1'-biphenyl]-4-carbonyl)-2-methyl-2-(selenocyanatomethyl)-3H-pyrrolo[1,2-a]indole-3,9(2H)-dione (28)**

A yellow solid after purification by flash column chromatography (petroleum ether/ethyl acetate = 8/1). 22.6 mg, 45% yield. Mp: 104-105°C

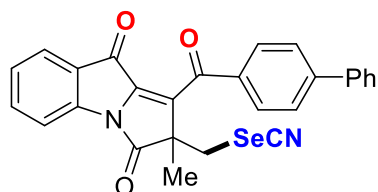

**<sup>1</sup>H NMR (400 MHz, CDCl<sub>3</sub>):** δ 8.0 – 7.97 (m, 3H), 7.76 – 7.72 (m, 4H), 7.69 – 7.66 (m, 2H), 7.49 (t, *J* = 7.4 Hz, 2H), 7.43 (d, *J* = 7.2 Hz, 1H), 7.32 (t, *J* = 7.6 Hz, 1H), 3.78 (d, *J* = 12.4 Hz, 1H), 3.75 (d, *J* = 12.4 Hz, 1H), 1.75 (s, 3H).

**<sup>13</sup>C NMR (100 MHz, CDCl<sub>3</sub>):** δ 189.6, 177.6, 170.3, 147.2, 143.4, 140.4, 139.5, 137.7, 135.9, 130.0, 129.0, 128.5, 128.3, 127.4, 127.4, 127.1, 126.2, 125.8, 115.3, 101.2, 61.2, 34.0, 22.9.

**HRMS (ESI, *m/z*):** calcd for C<sub>27</sub>H<sub>19</sub>N<sub>2</sub>O<sub>3</sub>Se [M + H]<sup>+</sup>, 499.0555; Measured, 499.0549.

**1-(4-(tert-butyl)benzoyl)-2-methyl-2-(selenocyanatomethyl)-3H-pyrrolo[1,2-a]indole-3,9(2H)-dione (29)**

A yellow oil after purification by flash column chromatography (petroleum ether/ethyl acetate = 8/1). 21.5 mg, 45% yield.

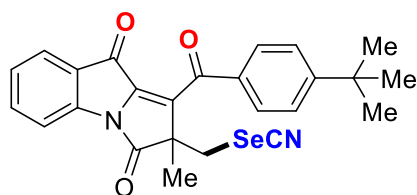

**<sup>1</sup>H NMR (400 MHz, CDCl<sub>3</sub>):** δ 7.98 (d, *J* = 8.8 Hz, 1H), 7.86 (d, *J* = 8.4 Hz, 2H), 7.77 – 7.74 (m, 2H), 7.52 (d, *J* = 8.4 Hz, 2H), 7.32 (t, *J* = 7.6 Hz, 1H), 3.76 (d, *J* = 12.8 Hz, 1H), 3.69 (d, *J* = 12.4 Hz, 1H), 1.70 (s, 3H), 1.37 (s, 9H).

**<sup>13</sup>C NMR (100 MHz, CDCl<sub>3</sub>):** δ 189.6, 177.6, 170.2, 158.8, 143.40, 139.7, 137.6, 134.2, 129.5, 128.3, 126.4, 125.9, 125.8, 125.7, 115.2, 101.5, 61.20, 35.4, 34.0, 31.0, 22.8.

**HRMS (ESI, *m/z*):** calcd for C<sub>25</sub>H<sub>22</sub>NaN<sub>2</sub>O<sub>3</sub>Se [M + Na]<sup>+</sup>, 501.0689; Measured, 501.0687.

**1-benzoyl-2-methyl-3,9-dioxo-2-(thiocyanatomethyl)-2,9-dihydro-3H-pyrrolo[1,2-a]indol-7-yl 2-(4-(2,2-dichlorocyclopropyl)phenoxy)-2-methylpropanoate (30)**

A yellow oil after purification by flash column chromatography (petroleum ether/dichloromethane = 1/1). 37 mg, 56% yield.

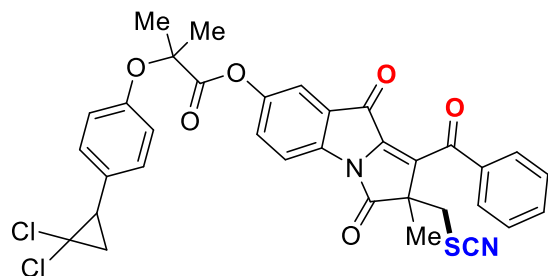

**<sup>1</sup>H NMR (400 MHz, CDCl<sub>3</sub>):** δ 7.94 (dd, *J* = 8.4, 1.2 Hz, 1H), 7.84 – 7.82 (m, 2H), 7.69 (t, *J* = 7.6 Hz, 1H), 7.51 (t, *J* = 7.8 Hz, 2H), 7.33 (t, *J* = 2.4 Hz, 1H), 7.30 – 7.27 (m, 1H), 7.16 (d, *J* = 8.8 Hz, 2H), 6.89 (d, *J* = 8.8 Hz, 2H), 3.80 (d, *J* = 13.6 Hz, 1H), 3.67 (d, *J* = 13.6 Hz, 1H), 2.88 – 2.83 (m, 1H), 1.98 – 1.94 (m, 1H), 1.82 – 1.78 (m, 1H), 1.75 (s, 6H), 1.73 (s, 3H)

**<sup>13</sup>C NMR (100 MHz, CDCl<sub>3</sub>):** δ 189.7, 176.4, 172.8, 169.8, 154.7, 148.0, 141.6, 141.0, 137.7, 134.1, 130.8, 130.0, 129.0, 128.9, 128.8, 128.7, 125.7, 118.8, 118.2, 116.0, 110.7, 79.1, 61.4, 60.8, 38.9, 34.7, 25.8, 25.4, 22.6.

**HRMS (ESI, *m/z*):** calcd for C<sub>34</sub>H<sub>27</sub>Cl<sub>2</sub>N<sub>2</sub>O<sub>6</sub>S [M + H]<sup>+</sup>, 661.0961; Measured, 661.0955.

**1-benzoyl-2-methyl-3,9-dioxo-2-(thiocyanatomethyl)-2,9-dihydro-3H-pyrrolo[1,2-a]indol-7-yl 2-(4-isobutylphenyl)propanoate (31)**

A yellow oil after purification by flash column chromatography (petroleum ether/dichloromethane = 1/1). 25 mg, 43% yield.

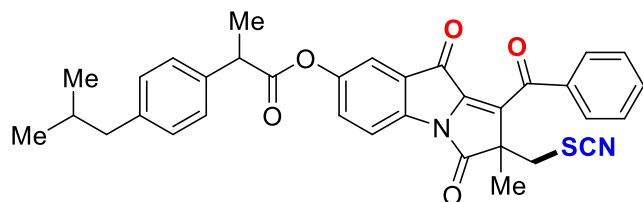

**<sup>1</sup>H NMR (400 MHz, CDCl<sub>3</sub>):**  $\delta$  7.92 (dd,  $J$  = 8.4, 2.4 Hz, 1H), 7.83 (d,  $J$  = 6.8 Hz, 2H), 7.68 (t,  $J$  = 7.6 Hz, 1H), 7.52 – 7.48 (m, 2H), 7.37 – 7.32 (m, 2H), 7.26 – 7.25 (m, 2H), 7.14 (d,  $J$  = 8.0 Hz, 2H), 3.93 (q,  $J$  = 7.2 Hz, 1H), 3.80 (d,  $J$  = 13.2 Hz, 1H), 3.66 (d,  $J$  = 13.6 Hz, 1H), 2.47 (d,  $J$  = 7.2 Hz, 2H), 1.89 – 1.83 (m, 1H), 1.73 (s, 3H), 1.59 (d,  $J$  = 6.8 Hz, 3H), 0.90 (d,  $J$  = 6.4 Hz, 6H).

**<sup>13</sup>C NMR (100 MHz, CDCl<sub>3</sub>):**  $\delta$  189.7, 176.5, 173.0, 169.8, 148.4, 141.7, 141.1, 140.7, 137.7, 136.6, 134.0, 131.1, 129.7, 129.0, 128.9, 128.7, 127.1, 125.5, 118.9, 115.8, 110.7, 61.3, 45.1, 45.0, 39.0, 30.2, 22.6, 22.4, 18.4.

**HRMS (ESI, m/z):** calcd for C<sub>34</sub>H<sub>31</sub>N<sub>2</sub>O<sub>5</sub>S [M + H]<sup>+</sup>, 579.1948; Measured, 579.1941.

**1-benzoyl-2-methyl-3,9-dioxo-2-(thiocyanatomethyl)-2,9-dihydro-3H-pyrrolo[1,2-a]indol-7-yl 2-(6-methoxynaphthalen-2-yl)propanoate (32)**

A yellow oil after purification by flash column chromatography (petroleum ether/dichloromethane = 1/1). 31mg, 51% yield.

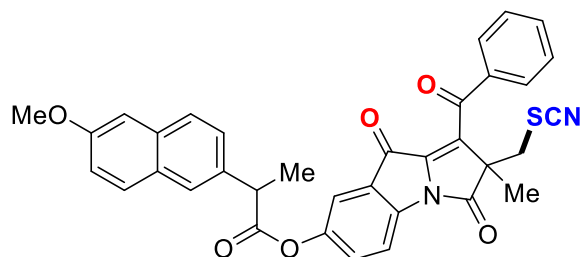

**<sup>1</sup>H NMR (400 MHz, CDCl<sub>3</sub>):**  $\delta$  7.90 (dd,  $J$  = 8.6, 3.4 Hz, 1H), 7.82 (d,  $J$  = 8.0 Hz, 2H), 7.77 – 7.72 (m, 3H), 7.67 (t,  $J$  = 7.4 Hz, 1H), 7.51 – 7.44 (m, 3H), 7.35 – 7.31 (m, 2H), 7.18 – 7.14 (m, 2H), 4.10 (q,  $J$  = 7.2 Hz, 1H), 3.93 (s, 3H), 3.79 (d,  $J$  = 13.6 Hz, 1H), 3.65 (d,  $J$  = 13.6 Hz, 1H), 1.72 (s, 3H), 1.68 (d,  $J$  = 7.2 Hz, 3H).

**<sup>13</sup>C NMR (100 MHz, CDCl<sub>3</sub>):** δ 189.7, 176.4, 172.9, 169.8, 157.8, 148.4, 141.7, 140.7, 137.7, 134.4, 134.0, 133.9, 131.0, 129.3, 128.9, 128.9, 128.7, 127.6, 126.2, 125.7, 125.5, 119.3, 118.9, 115.8, 110.7, 105.5, 61.3, 55.3, 45.4, 38.9, 22.6, 18.3.

**HRMS (ESI, m/z):** calcd for C<sub>35</sub>H<sub>27</sub>N<sub>2</sub>O<sub>6</sub>S [M + H]<sup>+</sup>, 603.1584; Measured, 603.1575.

**1-benzoyl-2-methyl-3,9-dioxo-2-(thiocyanatomethyl)-2,9-dihydro-3H-pyrrolo[1,2-a]indol-7-yl 2-(4-chlorophenoxy)-2-methylpropanoate (33)**

A yellow oil after purification by flash column chromatography (petroleum ether/dichloromethane = 1/1). 20.5 mg, 35% yield.

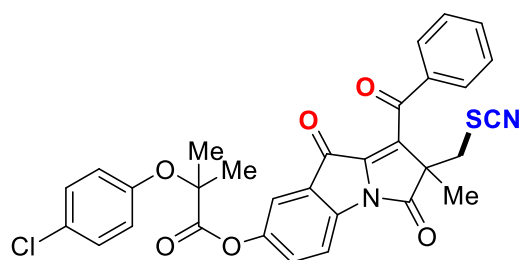

**<sup>1</sup>H NMR (400 MHz, CDCl<sub>3</sub>):** δ 7.97 (d, *J* = 8.8 Hz, 1H), 7.84 (d, *J* = 7.2 Hz, 2H), 7.69 (t, *J* = 7.6 Hz, 1H), 7.51 (t, *J* = 7.8 Hz, 2H), 7.39 (d, *J* = 2.4 Hz, 1H), 7.35 (dd, *J* = 8.6, 2.2 Hz, 1H), 7.23 (s, 2H), 6.86 (d, *J* = 9.2 Hz, 2H), 3.80 (d, *J* = 13.6 Hz, 1H), 3.68 (d, *J* = 13.6 Hz, 1H), 1.79 (s, 3H), 1.73 (s, 6H).

**<sup>13</sup>C NMR (100 MHz, CDCl<sub>3</sub>):** δ 189.7, 176.4, 172.5, 169.8, 153.7, 148.0, 141.6, 141.0, 137.7, 134.1, 130.9, 129.4, 129.0, 128.8, 127.8, 125.8, 120.5, 120.3, 118.7, 116.1, 110.7, 79.4, 61.4, 38.9, 25.2, 22.6.

**HRMS (ESI, m/z):** calcd for C<sub>31</sub>H<sub>24</sub>ClN<sub>2</sub>O<sub>6</sub>S [M + H]<sup>+</sup>, 587.1038; Measured, 587.1029.

**1-benzoyl-2-methyl-3,9-dioxo-2-(thiocyanatomethyl)-2,9-dihydro-3H-pyrrolo[1,2-a]indol-7-yl 5-(2,5-dimethylphenoxy)-2,2-dimethylpentanoate (34)**

A yellow solid after purification by flash column chromatography (petroleum ether/dichloromethane = 1/1). 40 mg, 64% yield. Mp: 122-123 °C

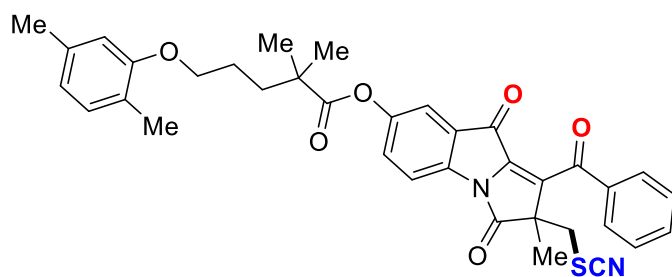

**<sup>1</sup>H NMR (400 MHz, CDCl<sub>3</sub>):** δ 7.95 (d, *J* = 8.4 Hz, 1H), 7.84 (d, *J* = 7.6 Hz, 2H), 7.68 (t, *J* = 7.6 Hz, 1H), 7.50 (t, *J* = 8.0 Hz, 2H), 7.40 – 7.35 (m, 2H), 7.00 (d, *J* = 7.6 Hz, 1H), 6.67 (d, *J* = 7.2 Hz, 1H), 6.62 (s, 1H), 3.98 (t, *J* = 5.8 Hz, 2H), 3.81 (d, *J* = 13.6 Hz, 1H), 3.68 (d, *J* = 13.6 Hz, 1H), 2.30 (s, 3H), 2.16 (s, 3H), 1.93 – 1.85 (m, 4H), 1.74 (s, 3H), 1.37 (s, 6H).

**<sup>13</sup>C NMR (100 MHz, CDCl<sub>3</sub>):** δ 189.7, 176.5, 176.1, 169.8, 156.7, 148.6, 141.7, 140.7, 137.7, 136.5, 134.1, 131.1, 130.3, 129.2, 129.0, 128.7, 125.5, 123.5, 120.8, 118.9, 115.9, 111.8, 110.7, 67.4, 61.3, 42.5, 39.0, 37.0, 25.2, 25.0, 22.6, 21.4, 15.8.

**HRMS (ESI, *m/z*):** calcd for C<sub>36</sub>H<sub>35</sub>N<sub>2</sub>O<sub>6</sub>S [M + H]<sup>+</sup>, 623.2210; Measured, 623.2203.

**1-benzoyl-2-methyl-3,9-dioxo-2-(selenocyanatomethyl)-2,9-dihydro-3H-pyrrolo[1,2-a]indol-7-yl 5-(2,5-dimethylphenoxy)-2,2-dimethylpentanoate (35)**

A yellow oil after purification by flash column chromatography (petroleum ether/dichloromethane = 1/1). 20 mg, 30% yield.

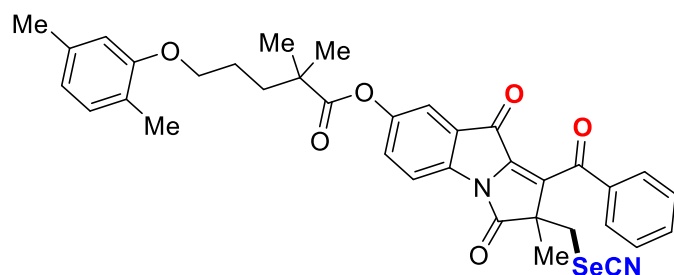

**<sup>1</sup>H NMR (400 MHz, CDCl<sub>3</sub>):** δ 7.95 (d, *J* = 8.8 Hz, 1H), 7.87 (d, *J* = 7.6 Hz, 2H), 7.69 (t, *J* = 7.4 Hz, 1H), 7.51 (t, *J* = 7.8 Hz, 2H), 7.40 – 7.36 (m, 2H), 6.99 (d, *J* = 7.6 Hz, 1H), 6.66 (d, *J* = 8.0 Hz, 1H), 6.61 (s, 1H), 3.97 (s, 2H), 3.76 (s, 2H), 2.30 (s, 3H), 2.16 (s, 3H), 1.90 – 1.85 (m, 4H), 1.75 (s, 3H), 1.37 (s, 6H).

**<sup>13</sup>C NMR (100 MHz, CDCl<sub>3</sub>):** δ 190.1, 176.6, 176.1, 170.0, 164.8, 156.7, 151.4, 148.6, 140.8, 137.3, 136.5, 134.4, 131.1, 130.3, 129.2, 128.8, 123.5, 120.8, 118.9, 115.9, 111.8, 109.9, 101.0, 67.5, 61.1, 42.5, 37.0, 33.8, 25.2, 25.0, 22.9, 21.4, 15.8.

**HRMS (ESI, *m/z*):** calcd for C<sub>36</sub>H<sub>35</sub>N<sub>2</sub>O<sub>6</sub>Se [M + H]<sup>+</sup>, 671.1658; Measured, 671.1660.

# Copies of the $^1\text{H}$ NMR, $^{13}\text{C}$ NMR, $^{19}\text{F}$ NMR

## 1-s $^1\text{H}$ NMR (400 MHz, $\text{CDCl}_3$ )

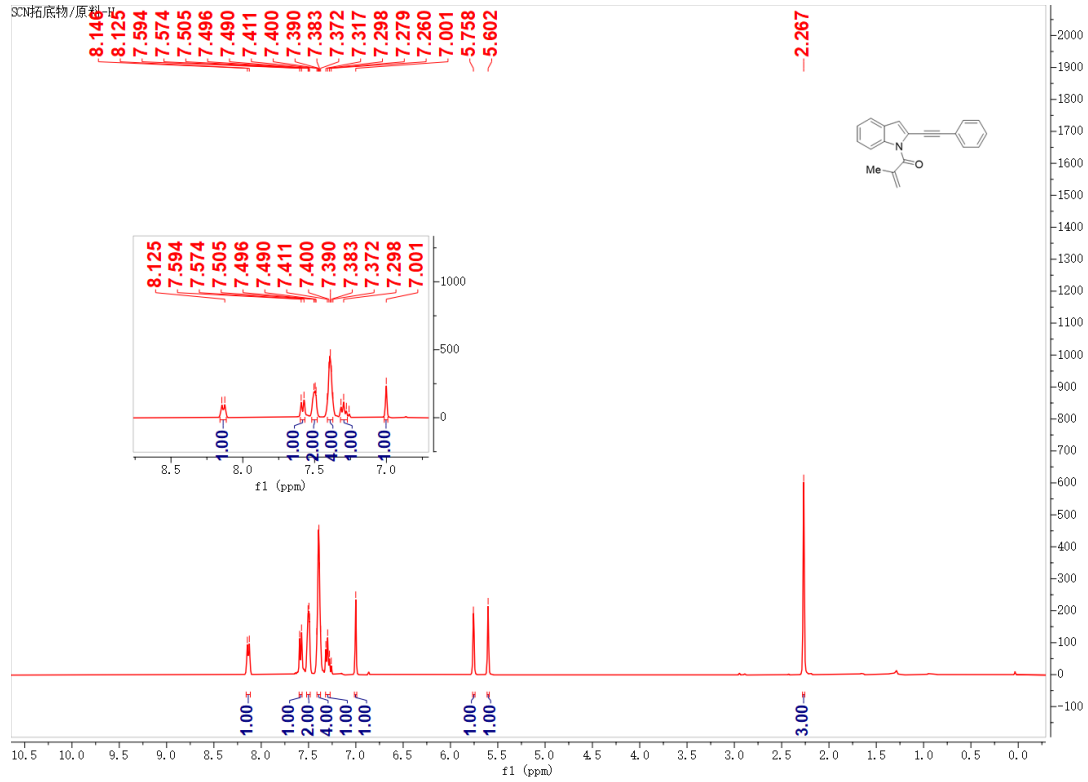

## 1-s $^{13}\text{C}$ { $^1\text{H}$ } NMR (100 MHz, $\text{CDCl}_3$ )

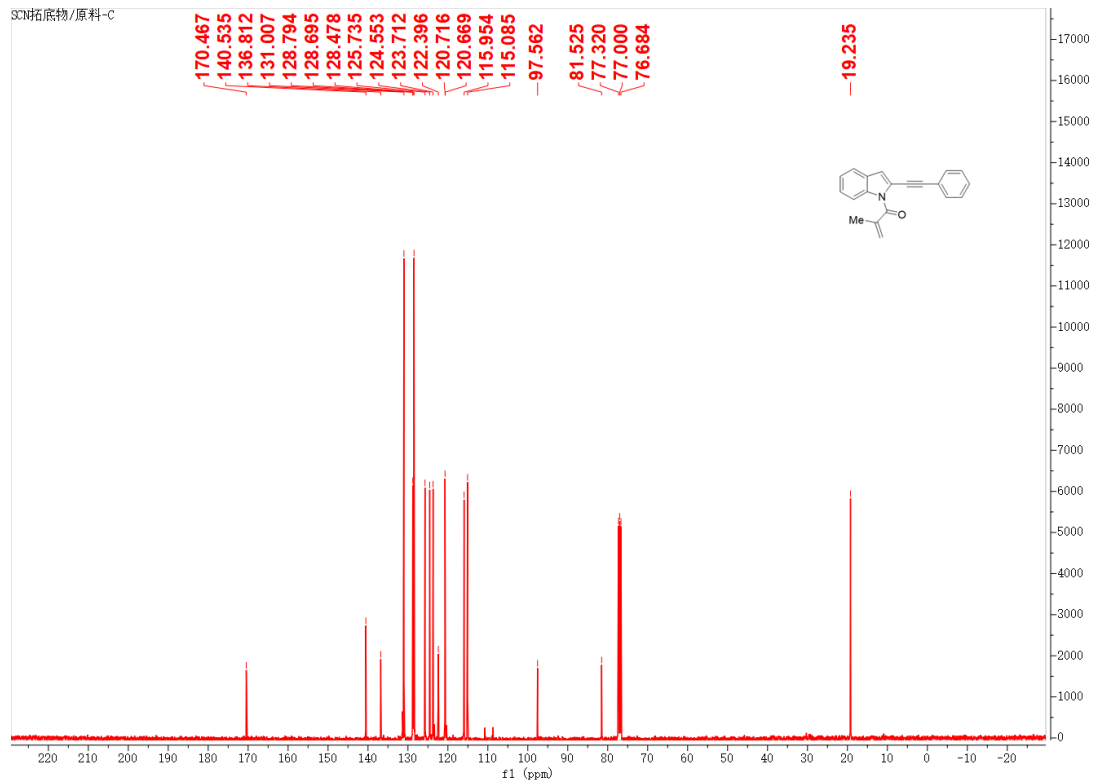

### 1-<sup>1</sup>H NMR (400 MHz, CDCl<sub>3</sub>)

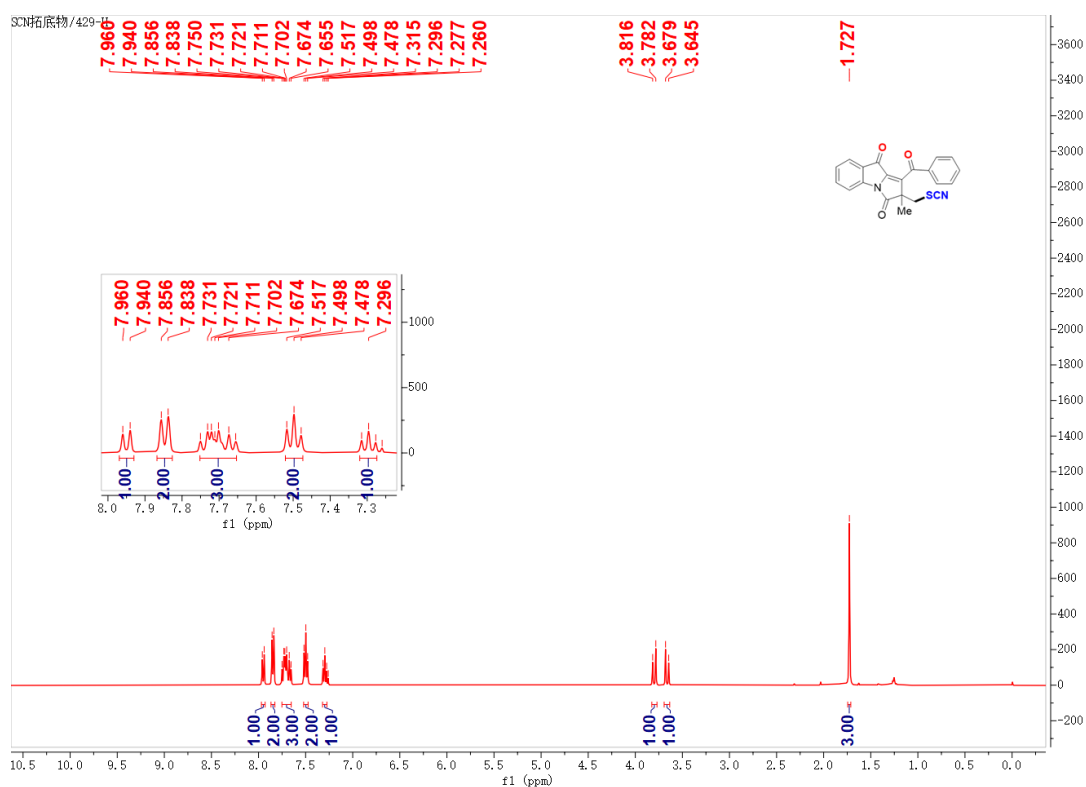

### 1-<sup>13</sup>C {<sup>1</sup>H} NMR (100 MHz, CDCl<sub>3</sub>)

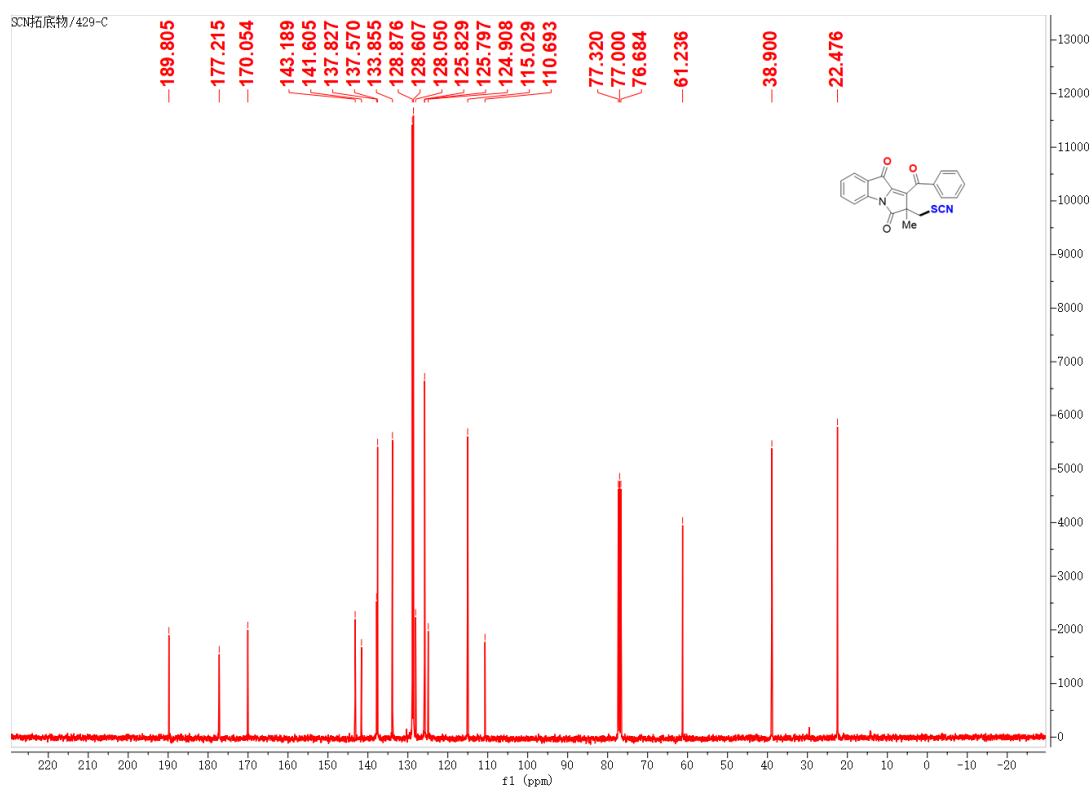

## 2-<sup>1</sup>H NMR (400 MHz, CDCl<sub>3</sub>)

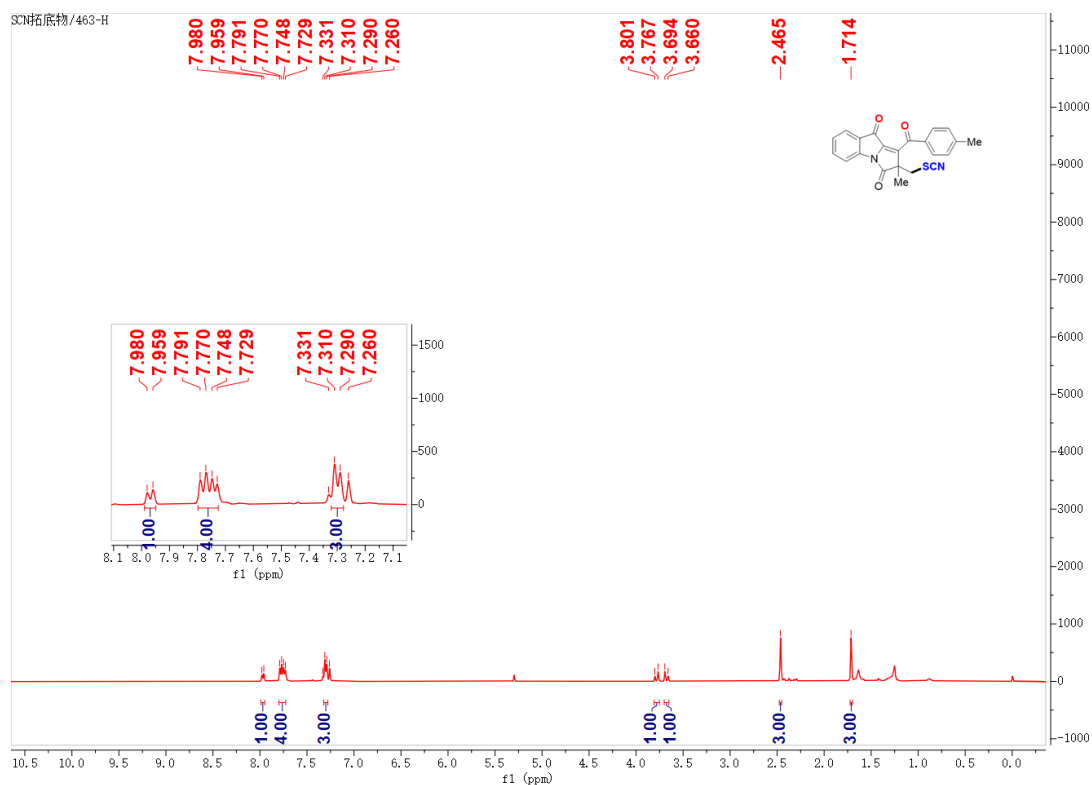

## 2-<sup>13</sup>C {<sup>1</sup>H} NMR (100 MHz, CDCl<sub>3</sub>)

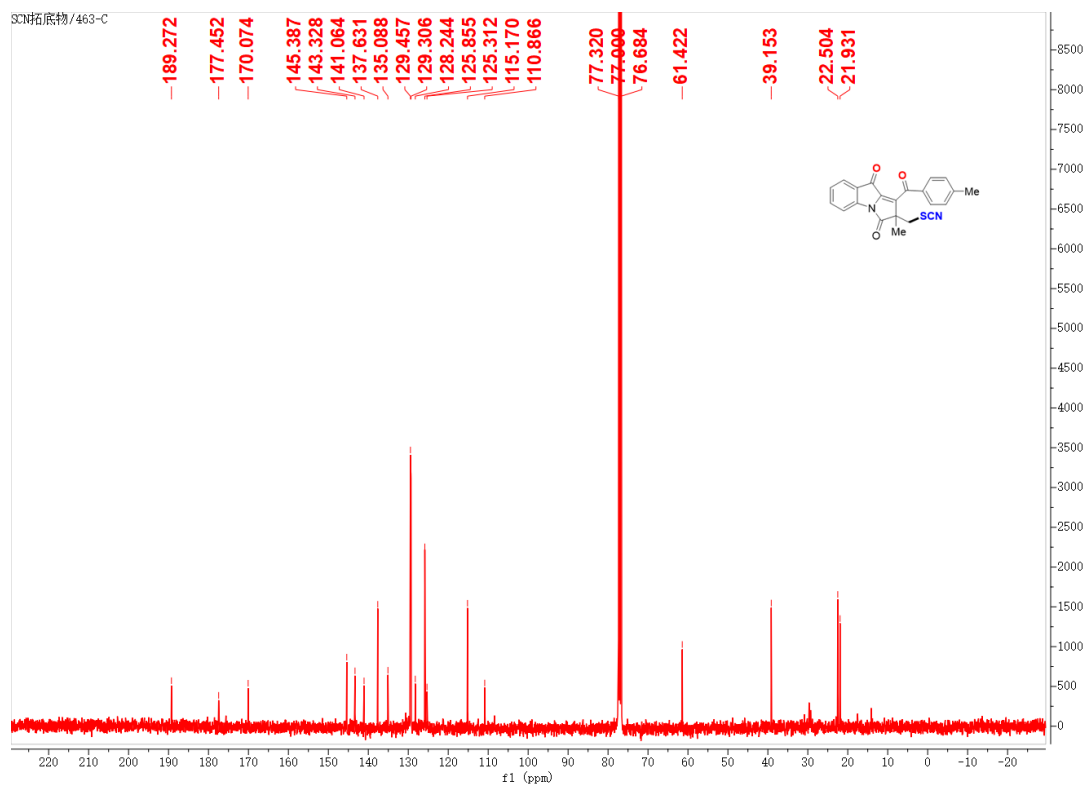

### 3-<sup>1</sup>H NMR (400 MHz, CDCl<sub>3</sub>)

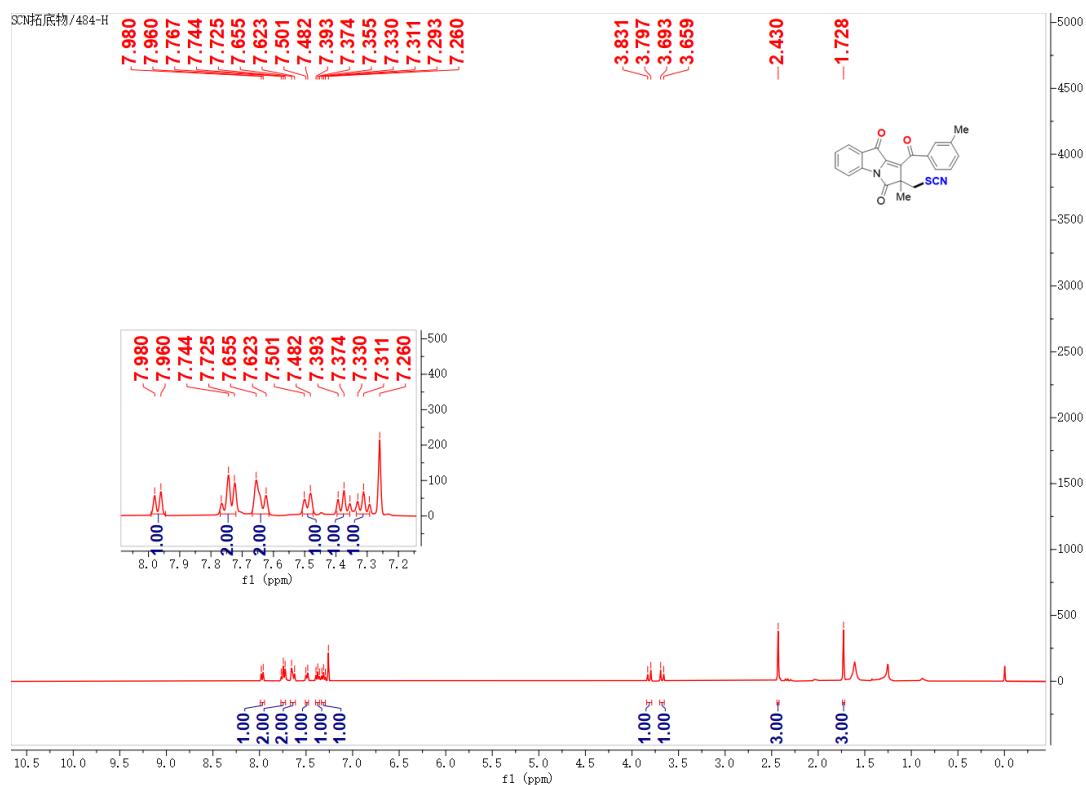

### 3-<sup>13</sup>C{<sup>1</sup>H} NMR (100 MHz, CDCl<sub>3</sub>)

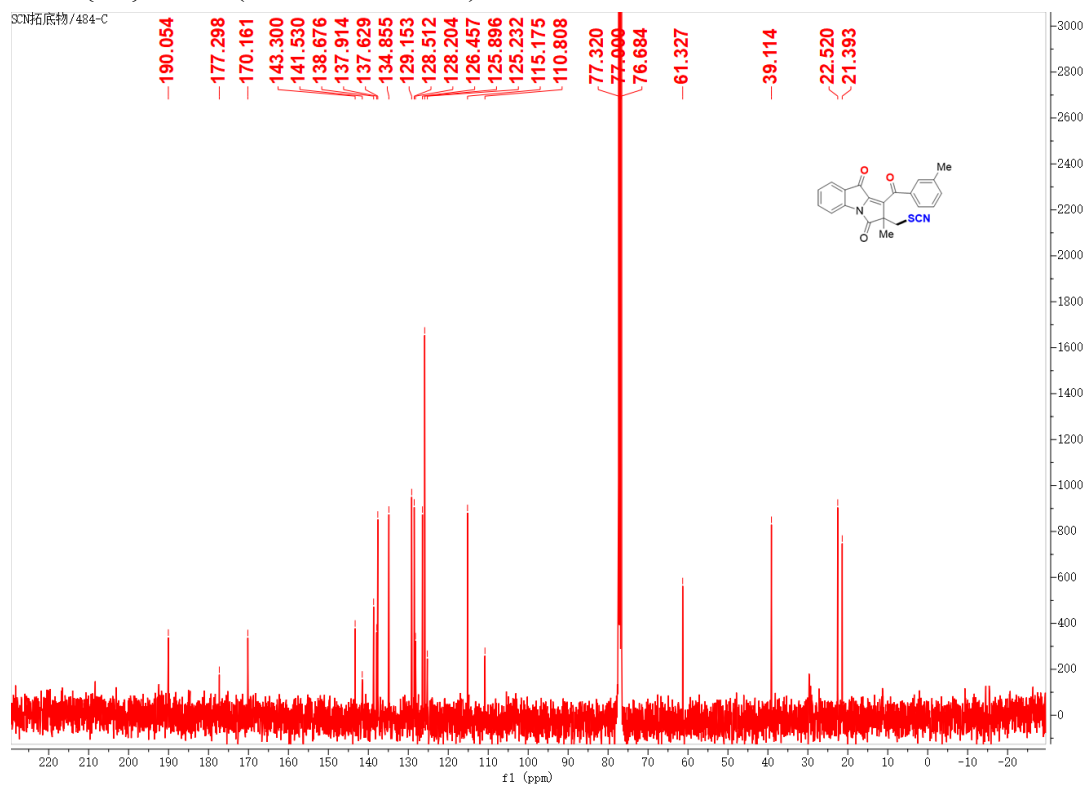

### 4-<sup>1</sup>H NMR (400 MHz, CDCl<sub>3</sub>)

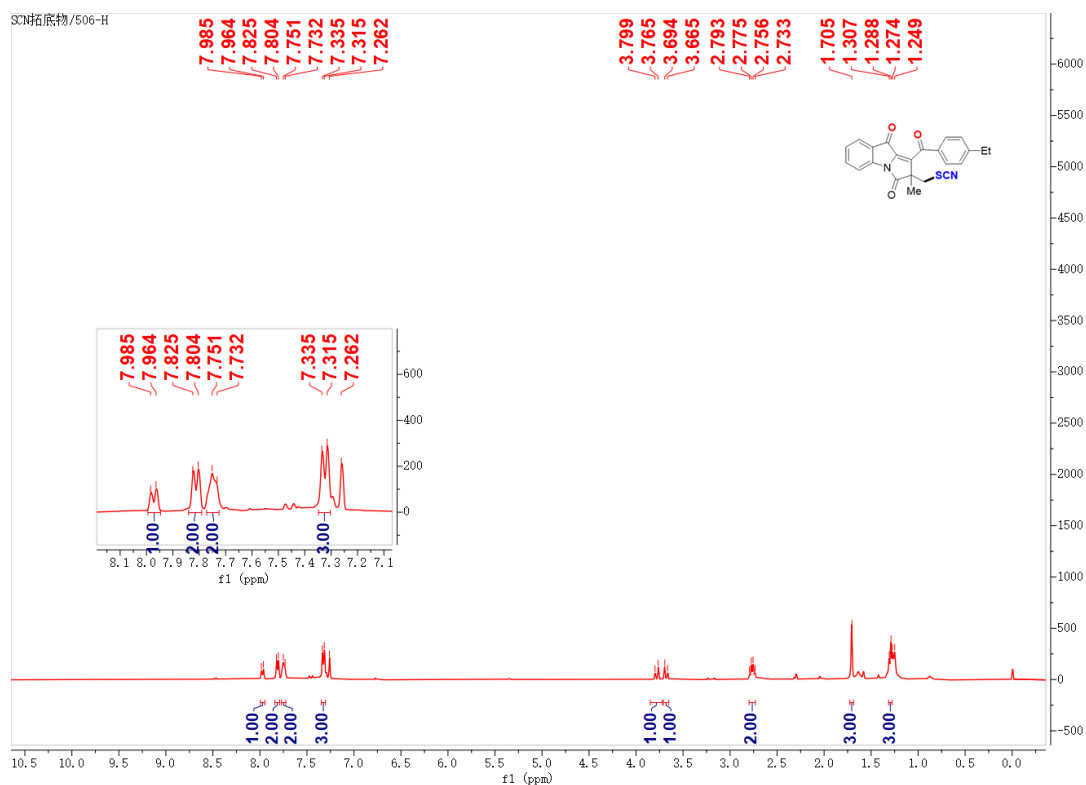

### 4-<sup>13</sup>C {<sup>1</sup>H} NMR (100 MHz, CDCl<sub>3</sub>)

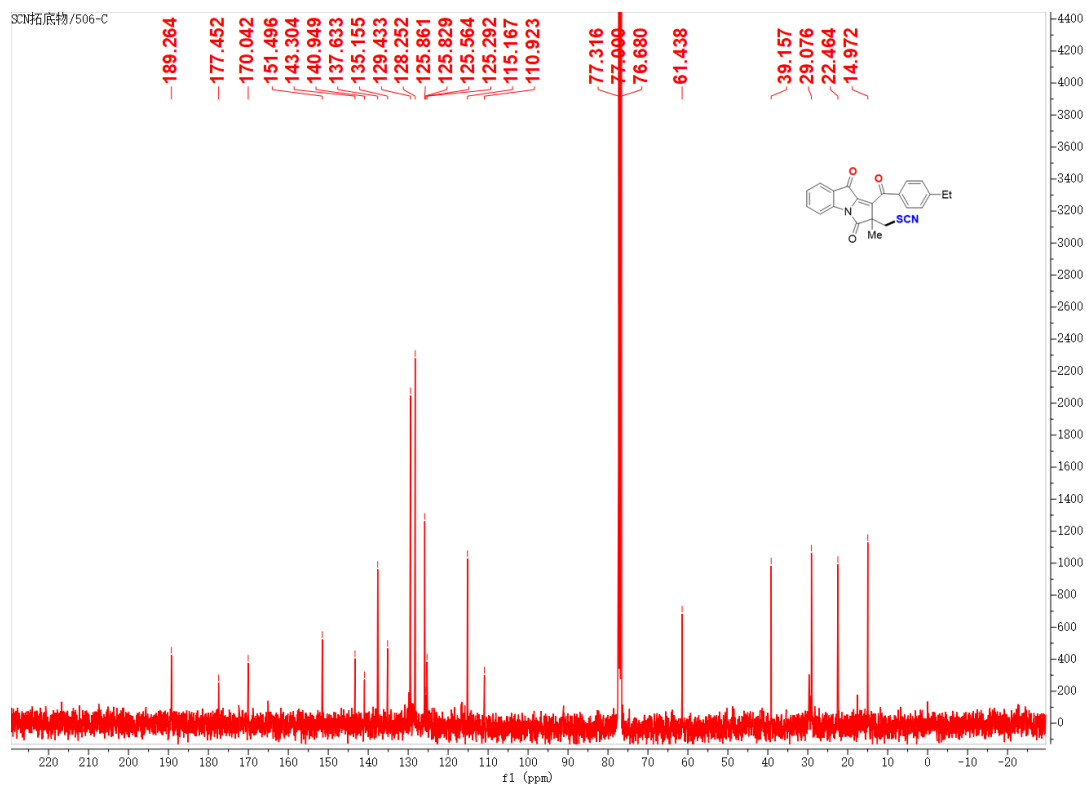

### 5-<sup>1</sup>H NMR (400 MHz, CDCl<sub>3</sub>)

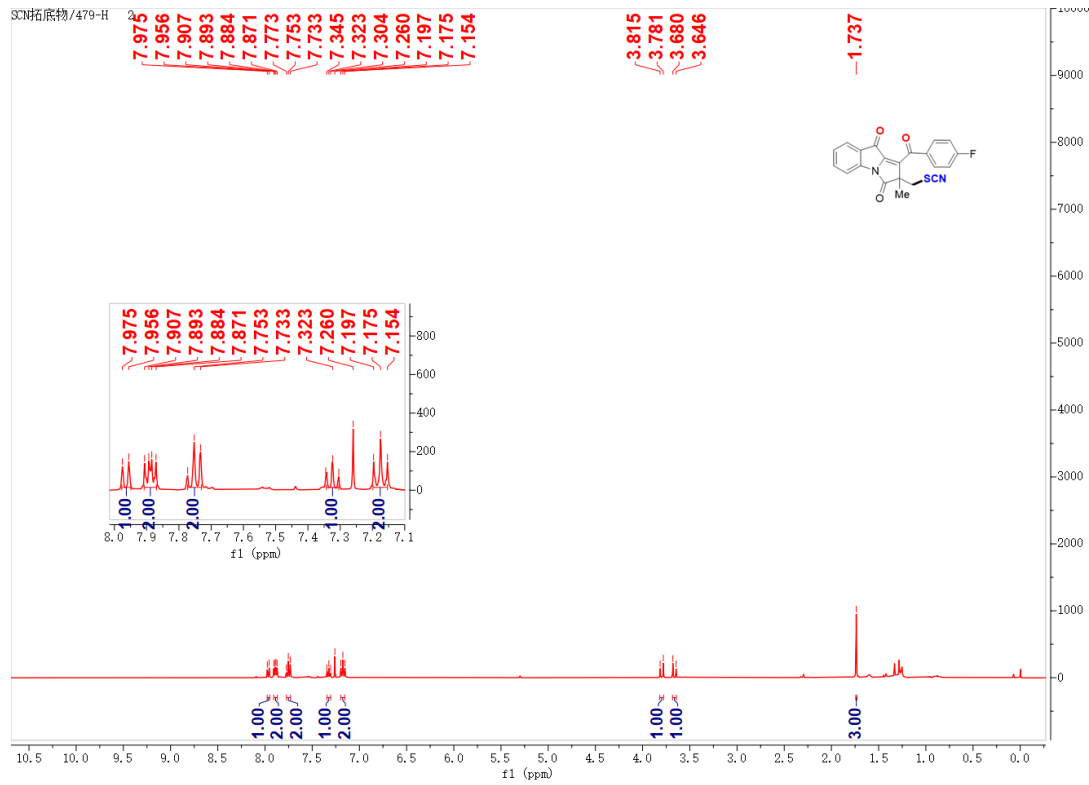

### 5-<sup>13</sup>C {<sup>1</sup>H} NMR (100 MHz, CDCl<sub>3</sub>)

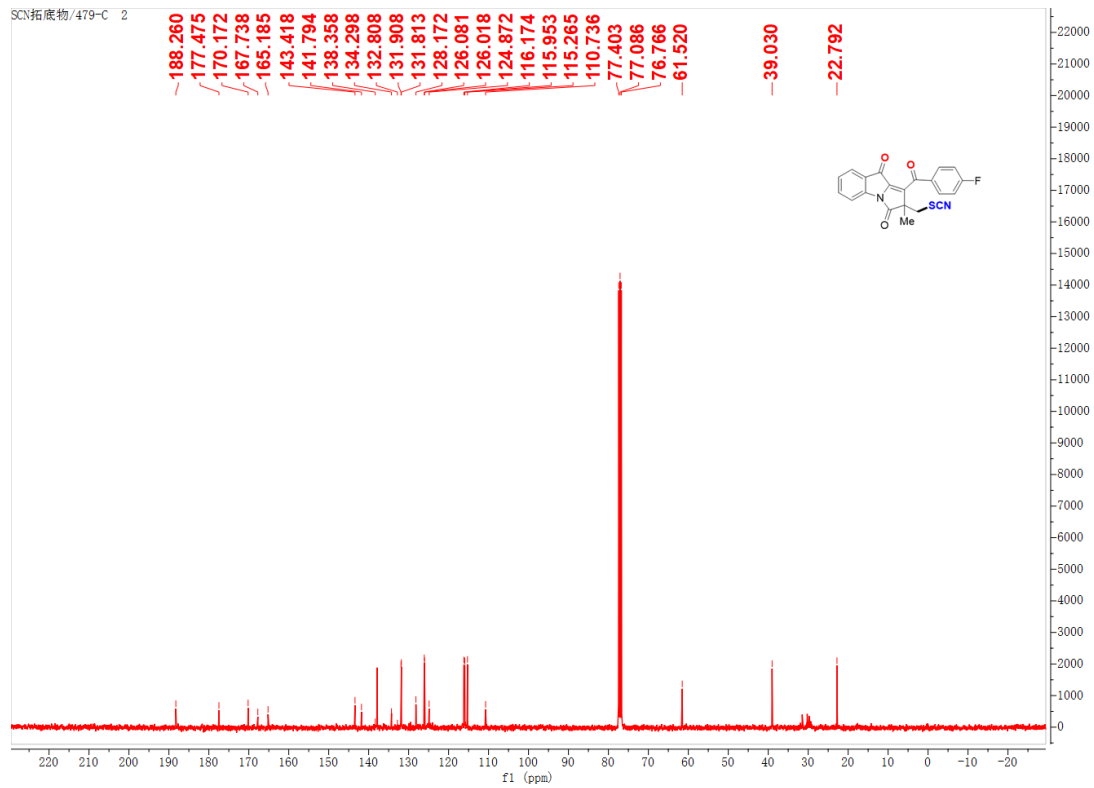

### 5-<sup>19</sup>F NMR (565 MHz, CDCl<sub>3</sub>)

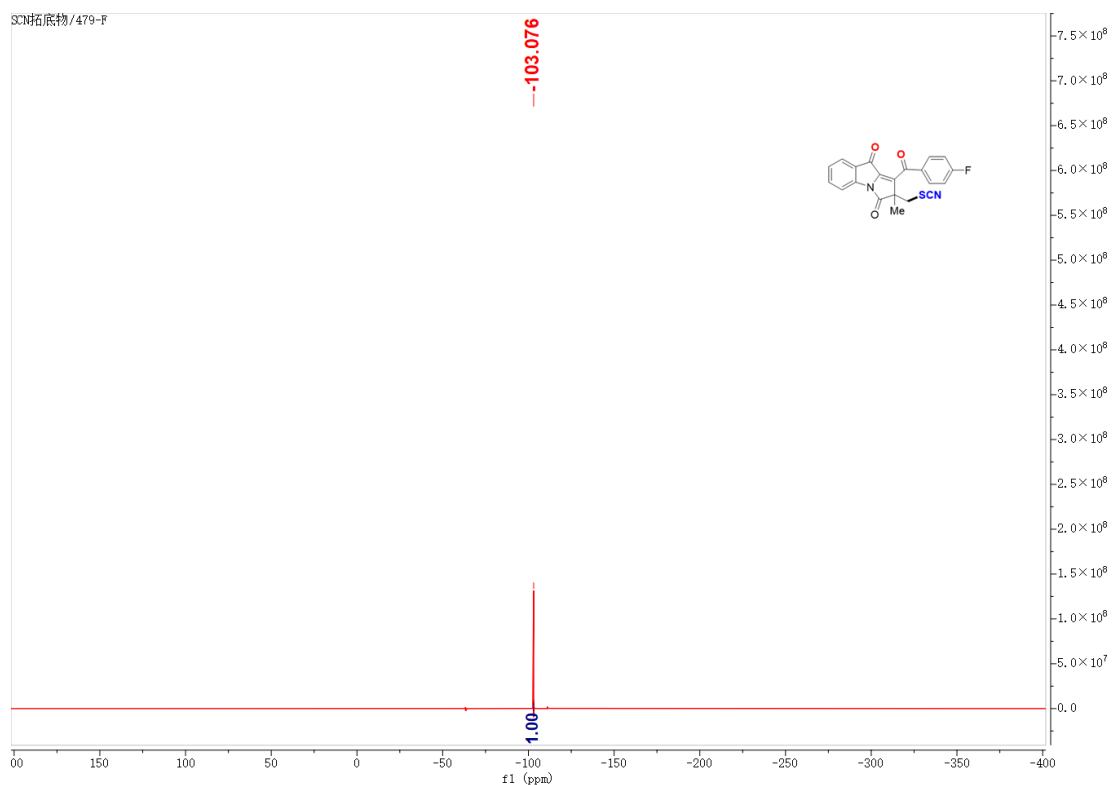

### 6-<sup>1</sup>H NMR (400 MHz, CDCl<sub>3</sub>)

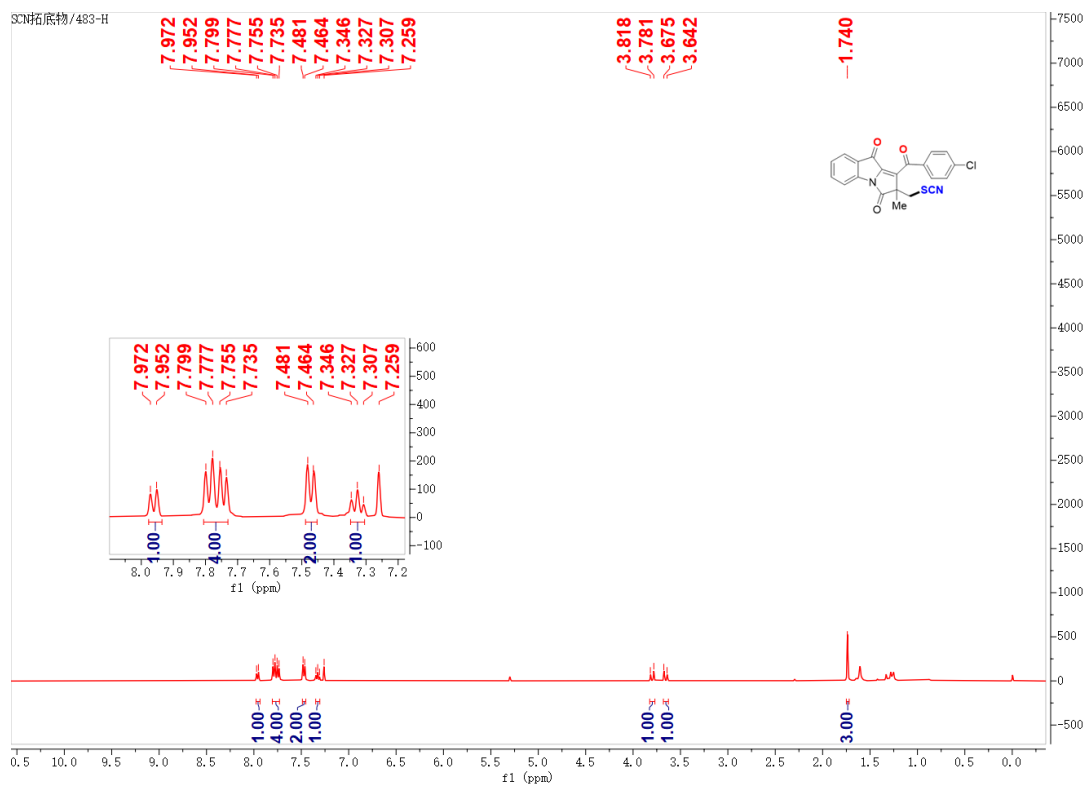

### 6-<sup>13</sup>C{<sup>1</sup>H} NMR (100 MHz, CDCl<sub>3</sub>)

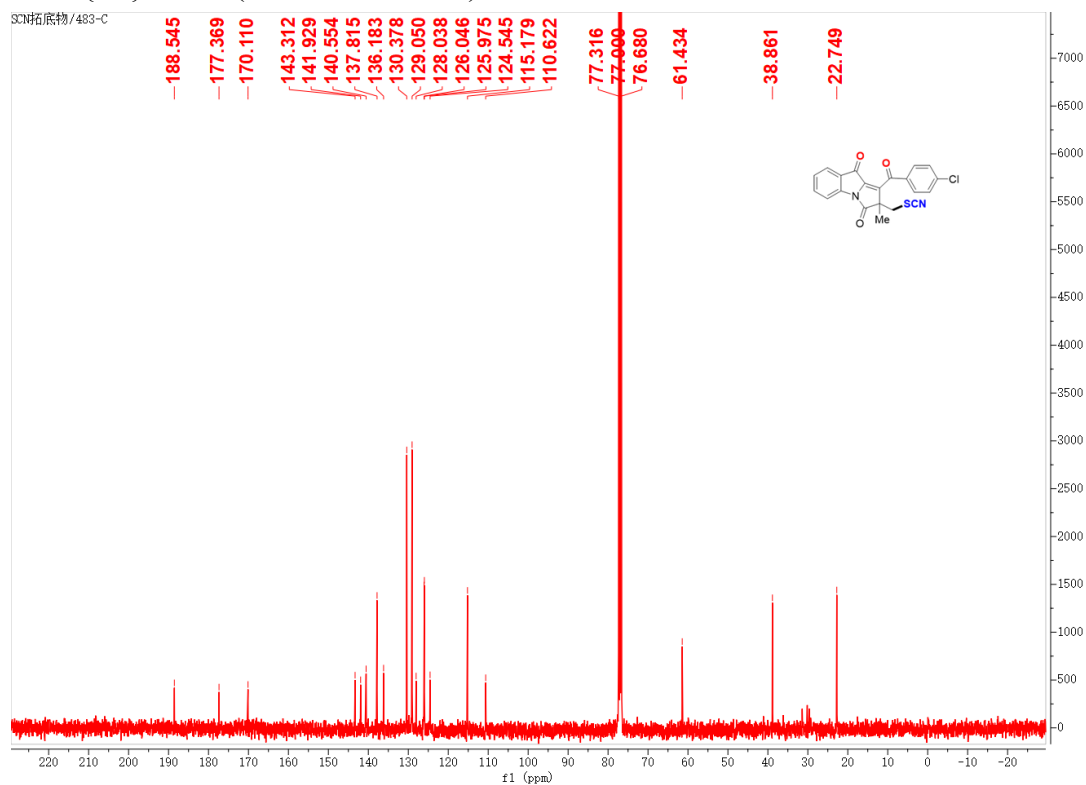

### 7-<sup>1</sup>H NMR (400 MHz, CDCl<sub>3</sub>)

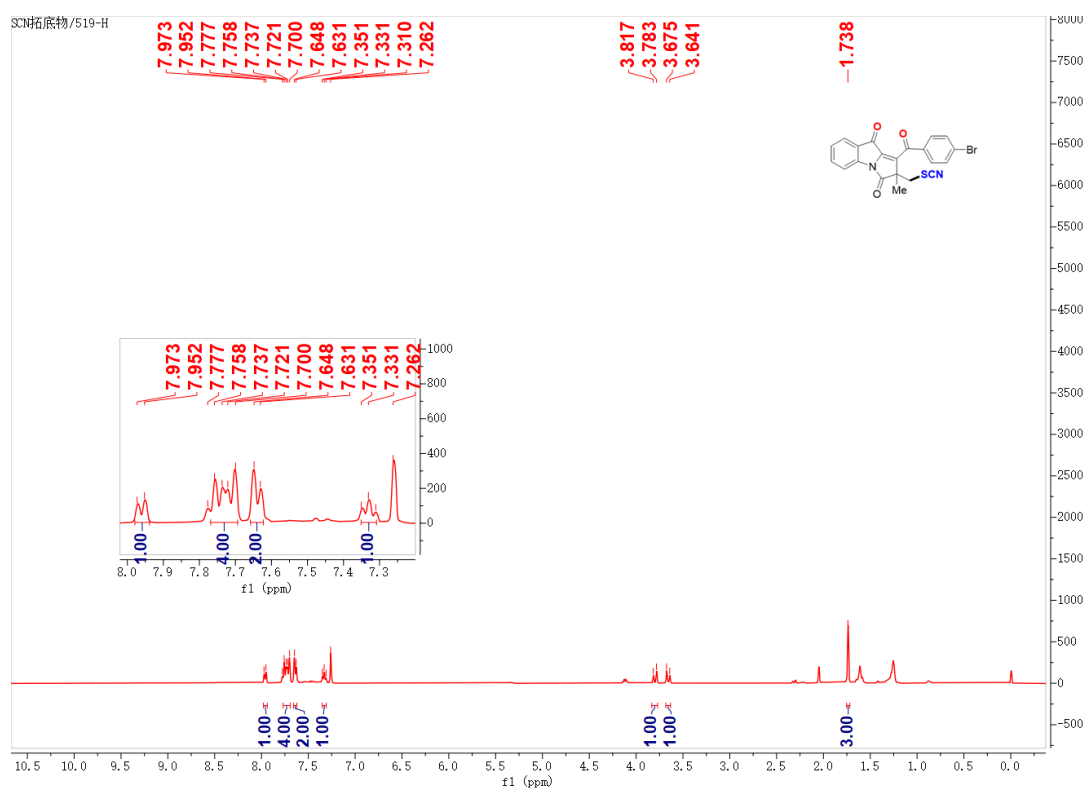

7-<sup>13</sup>C{<sup>1</sup>H} NMR (100 MHz, CDCl<sub>3</sub>)

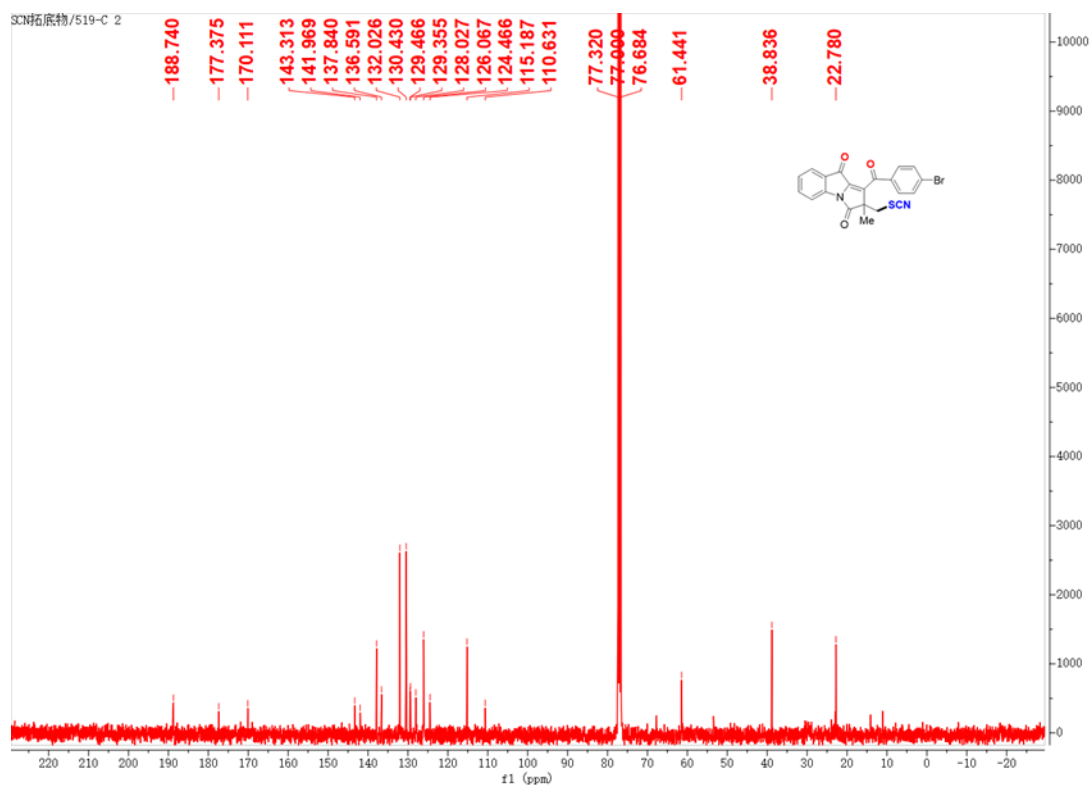

8-<sup>1</sup>H NMR (400 MHz, CDCl<sub>3</sub>)

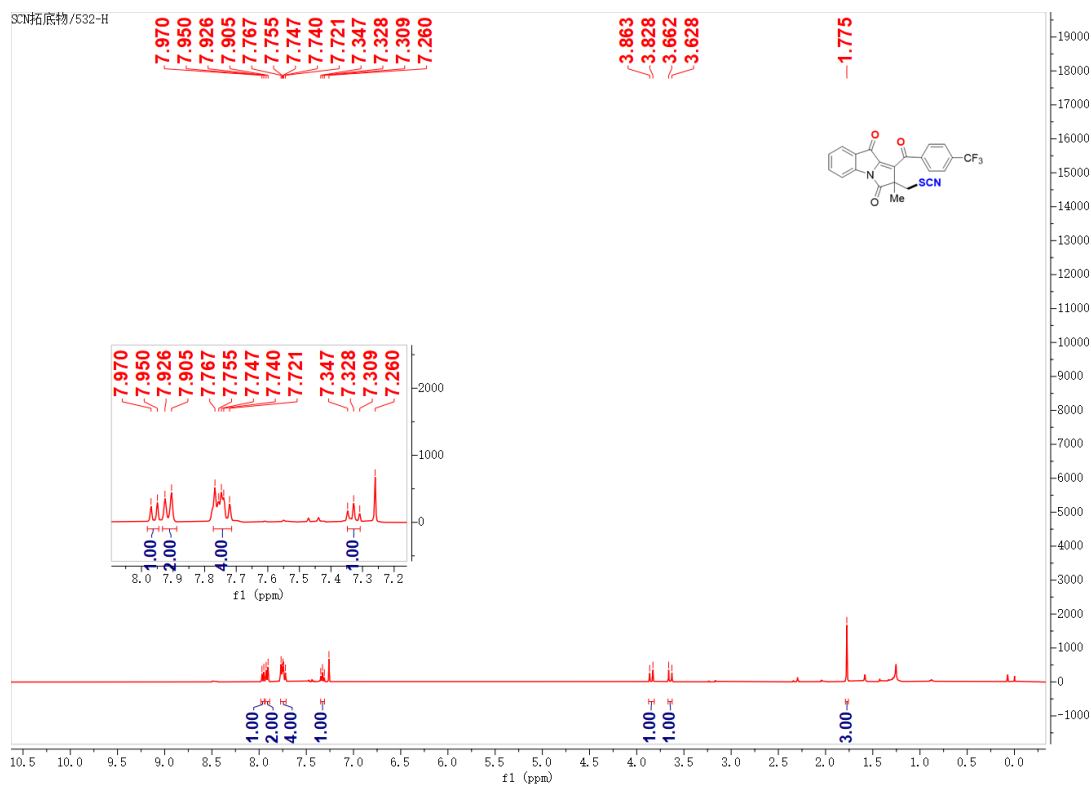

### $8\text{-}^{13}\text{C}\{^1\text{H}\}$ NMR (100 MHz, $\text{CDCl}_3$ )

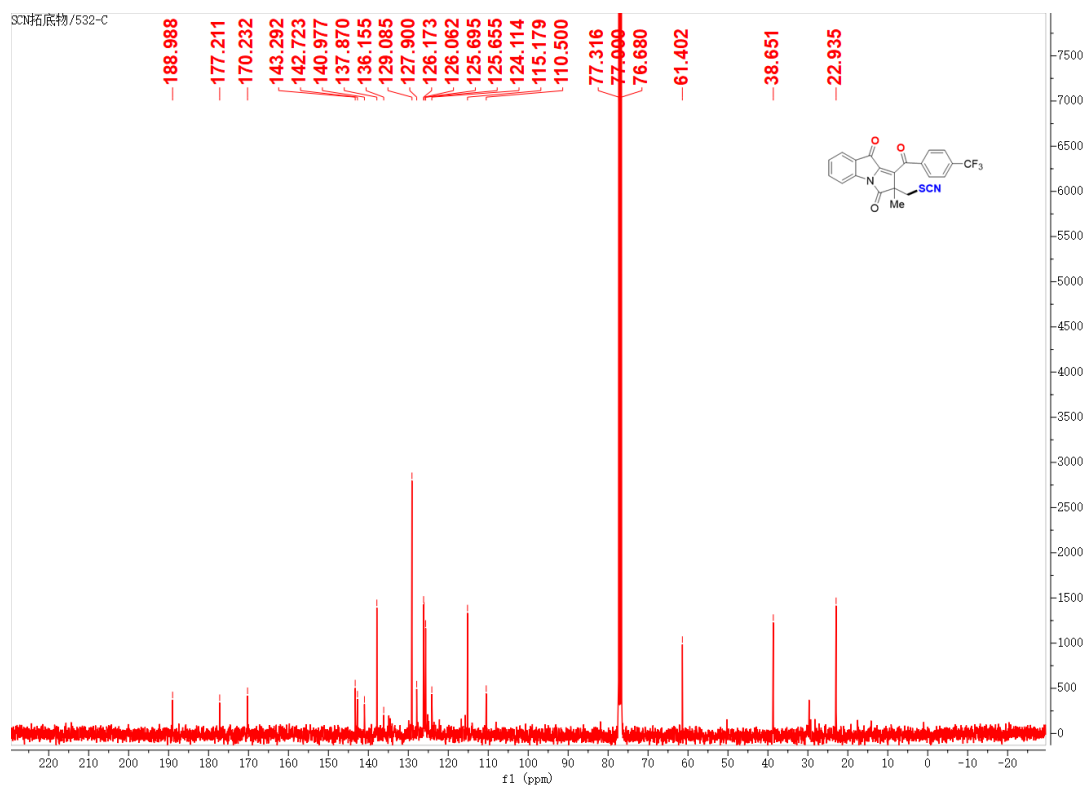

### $8\text{-}^{19}\text{F}$ NMR (565 MHz, $\text{CDCl}_3$ )

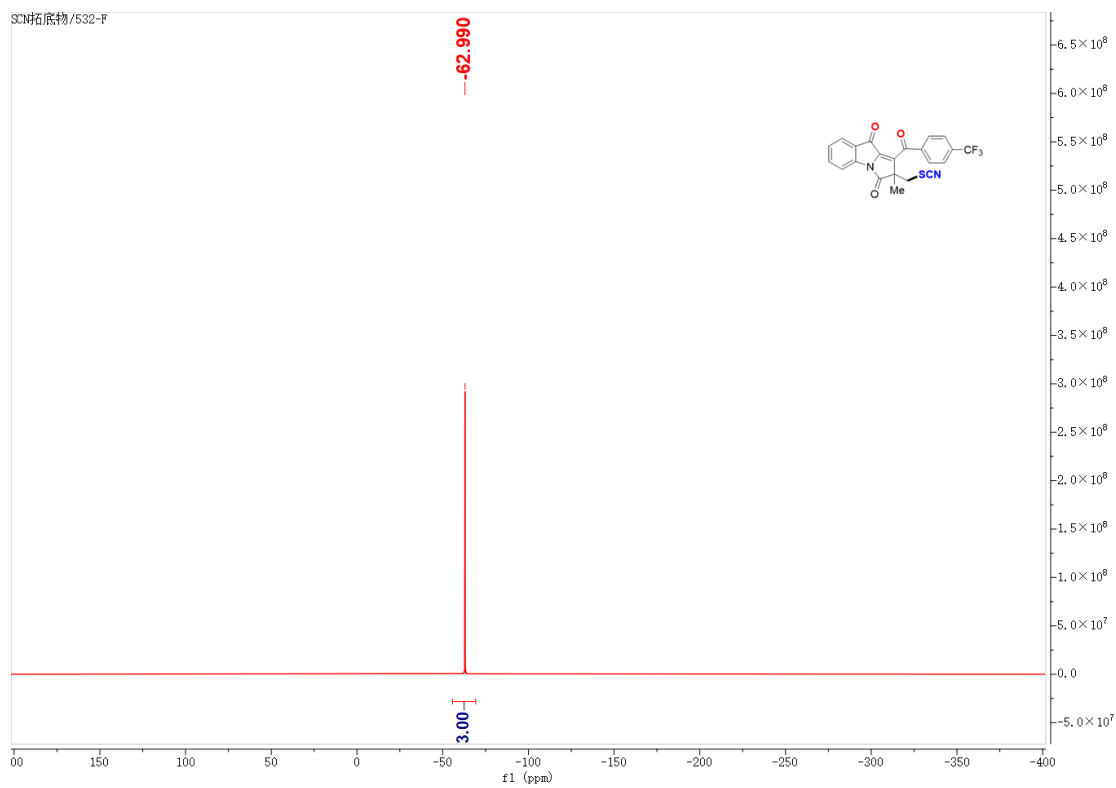

### 9-<sup>1</sup>H NMR (400 MHz, CDCl<sub>3</sub>)

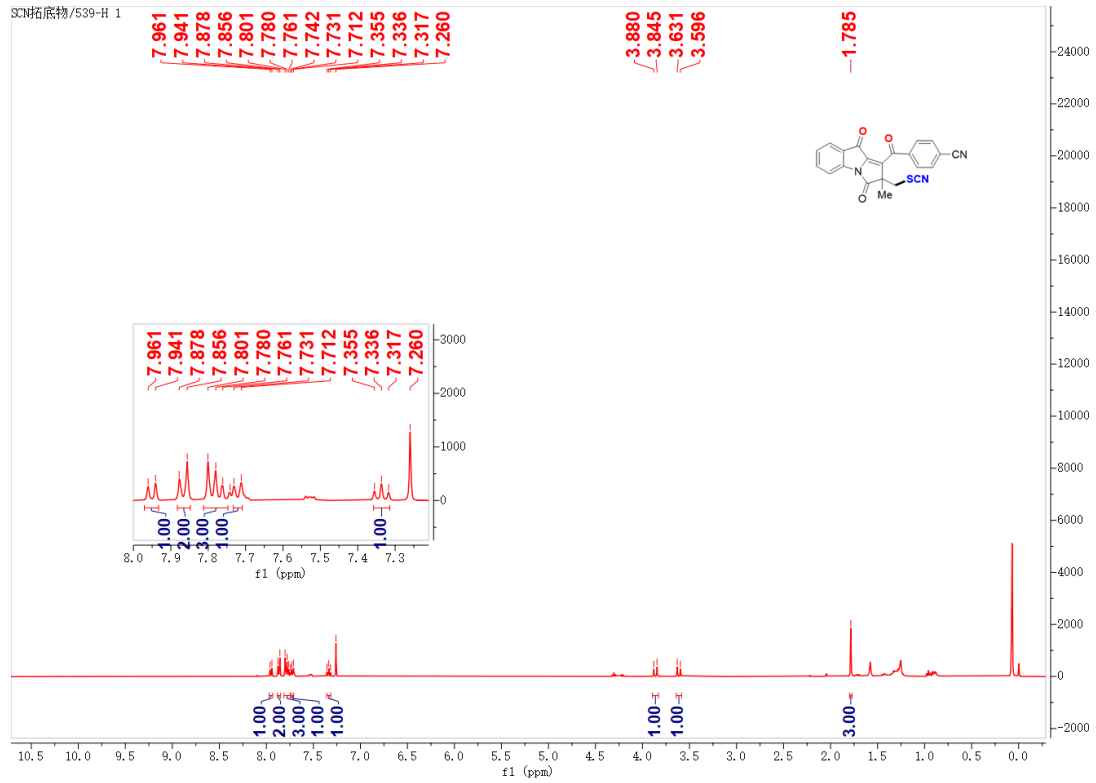

### 9-<sup>13</sup>C{<sup>1</sup>H} NMR (100 MHz, CDCl<sub>3</sub>)

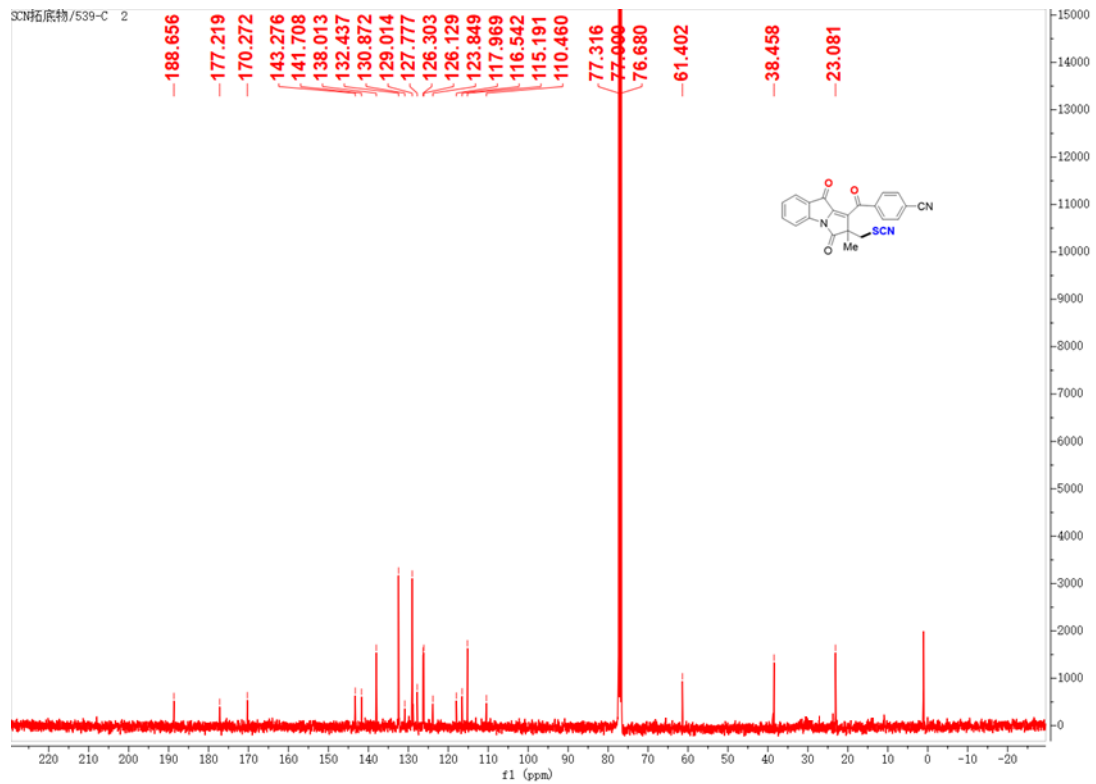

# 10-<sup>1</sup>H NMR (400 MHz, CDCl<sub>3</sub>)

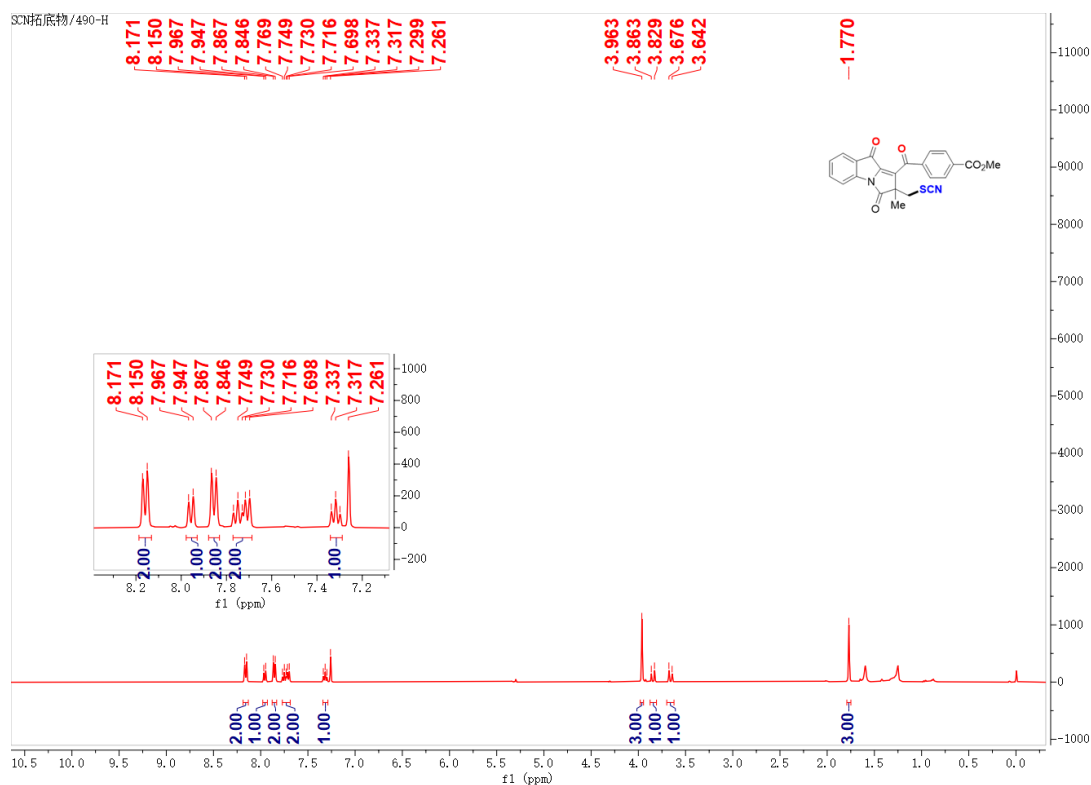

# 10-<sup>13</sup>C {<sup>1</sup>H} NMR (100 MHz, CDCl<sub>3</sub>)

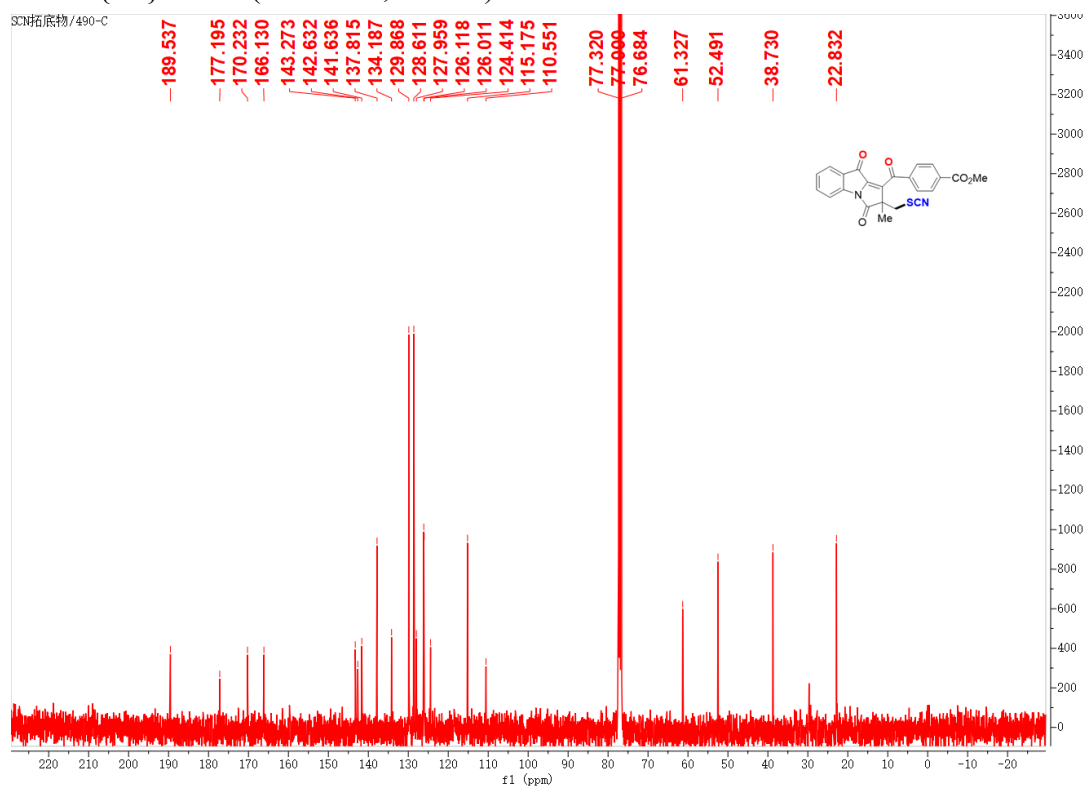

### 11-<sup>1</sup>H NMR (400 MHz, CDCl<sub>3</sub>)

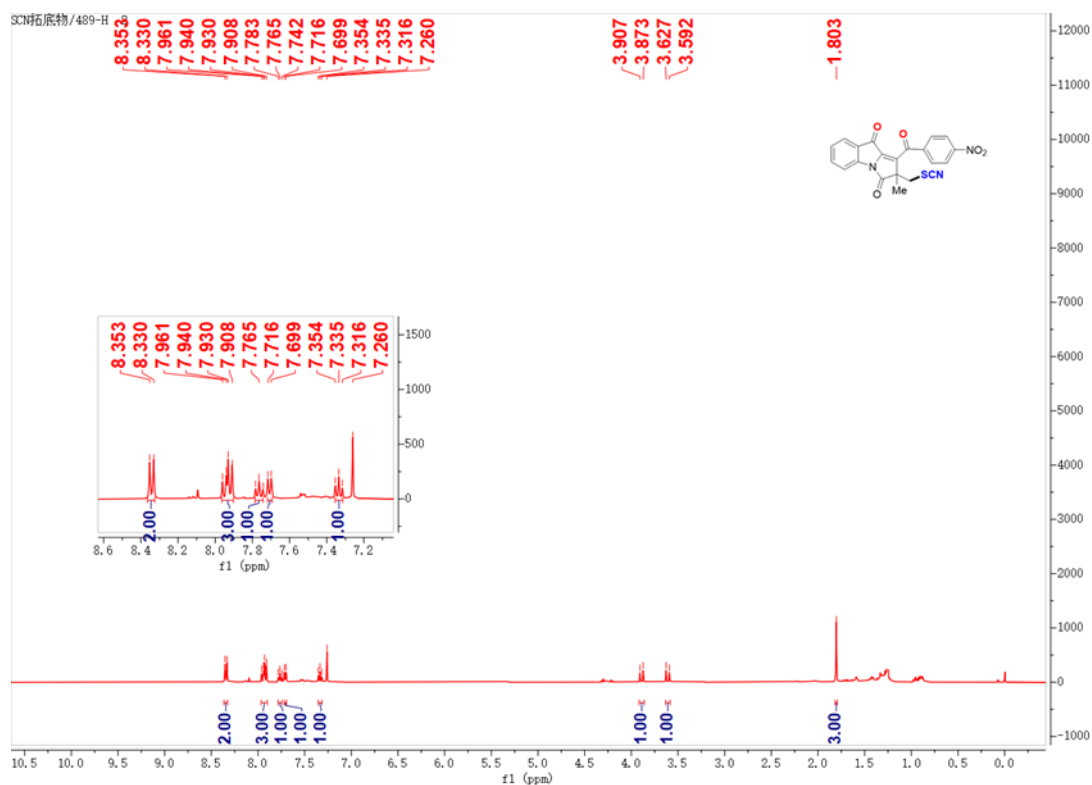

### 11-<sup>13</sup>C{<sup>1</sup>H} NMR (100 MHz, CDCl<sub>3</sub>)

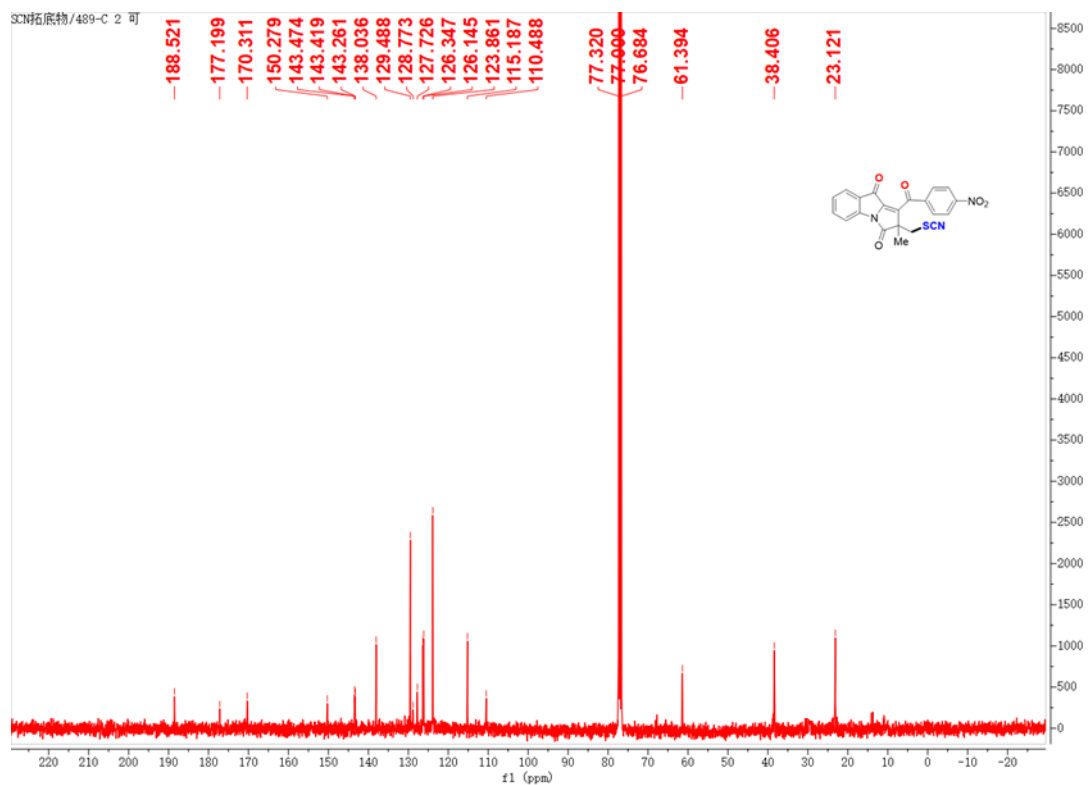

## 12-<sup>1</sup>H NMR (400 MHz, CDCl<sub>3</sub>)

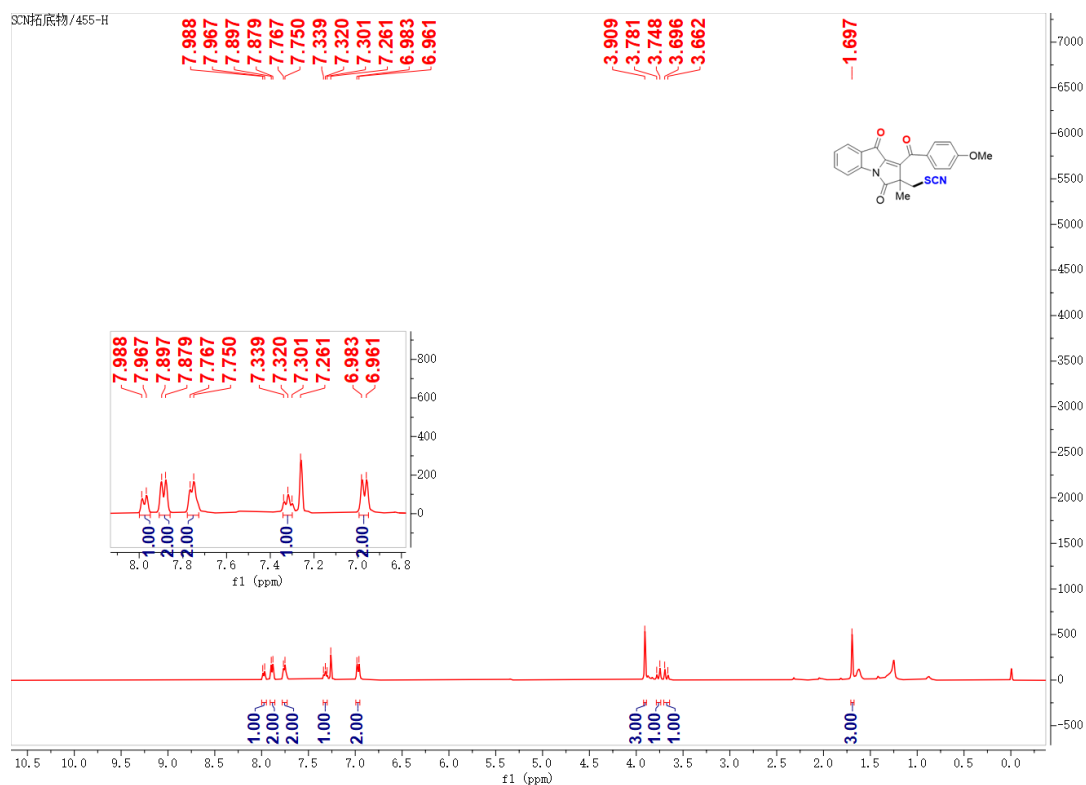

## 12-<sup>13</sup>C {<sup>1</sup>H} NMR (100 MHz, CDCl<sub>3</sub>)

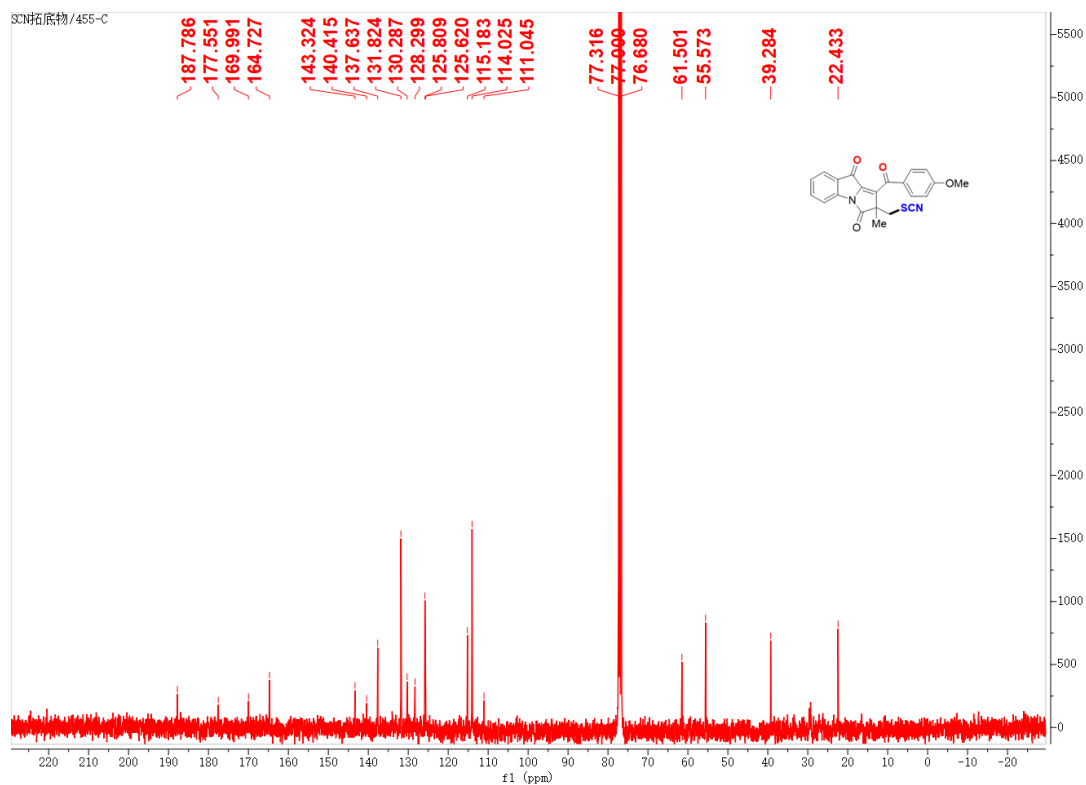

### 13-<sup>1</sup>H NMR (400 MHz, CDCl<sub>3</sub>)

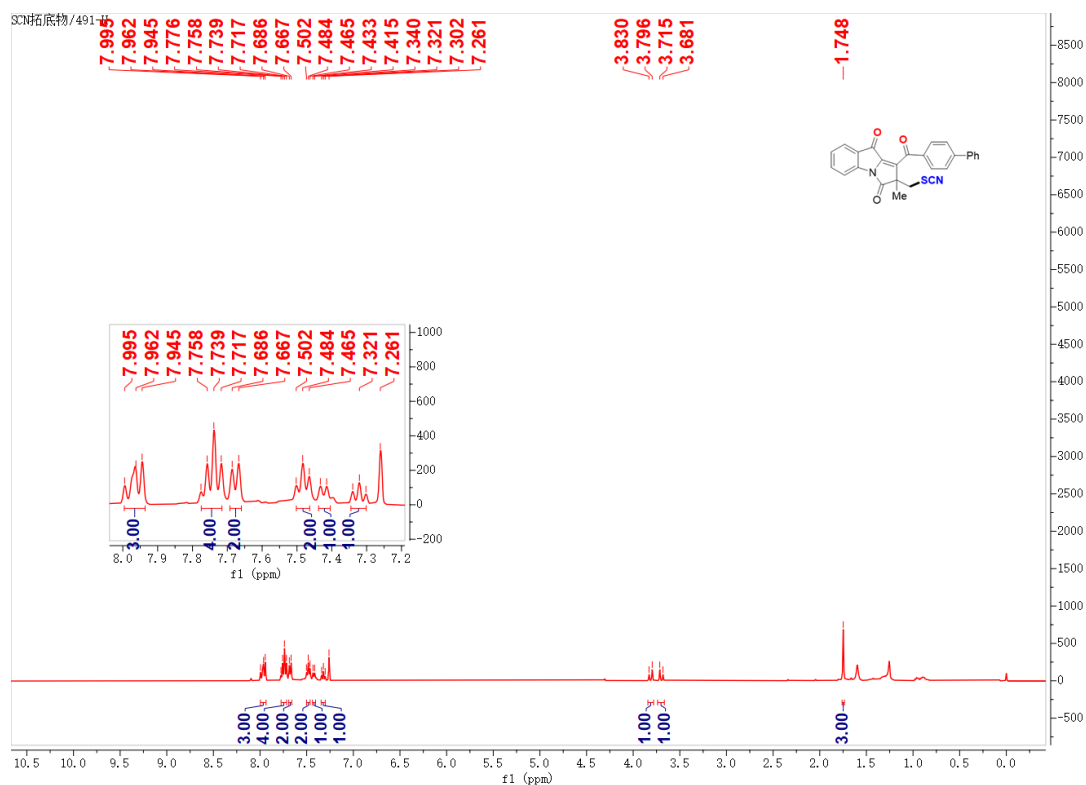

### 13-<sup>13</sup>C {<sup>1</sup>H} NMR (100 MHz, CDCl<sub>3</sub>)

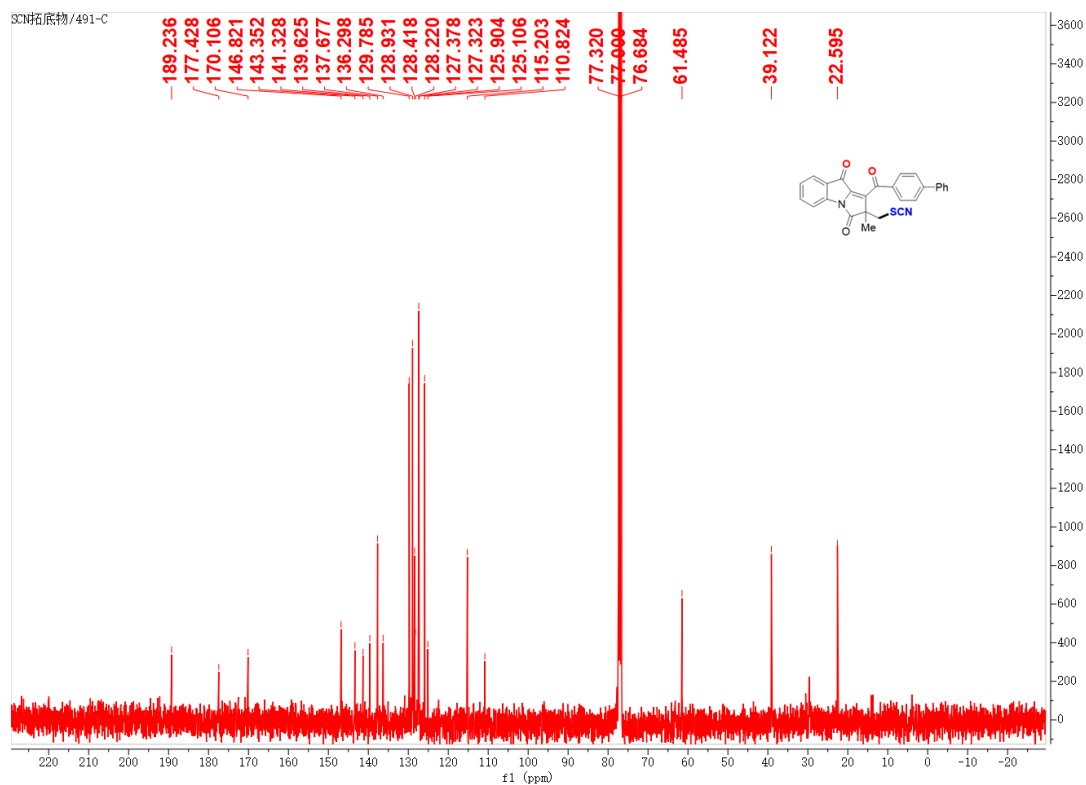

### 14-<sup>1</sup>H NMR (400 MHz, CDCl<sub>3</sub>)

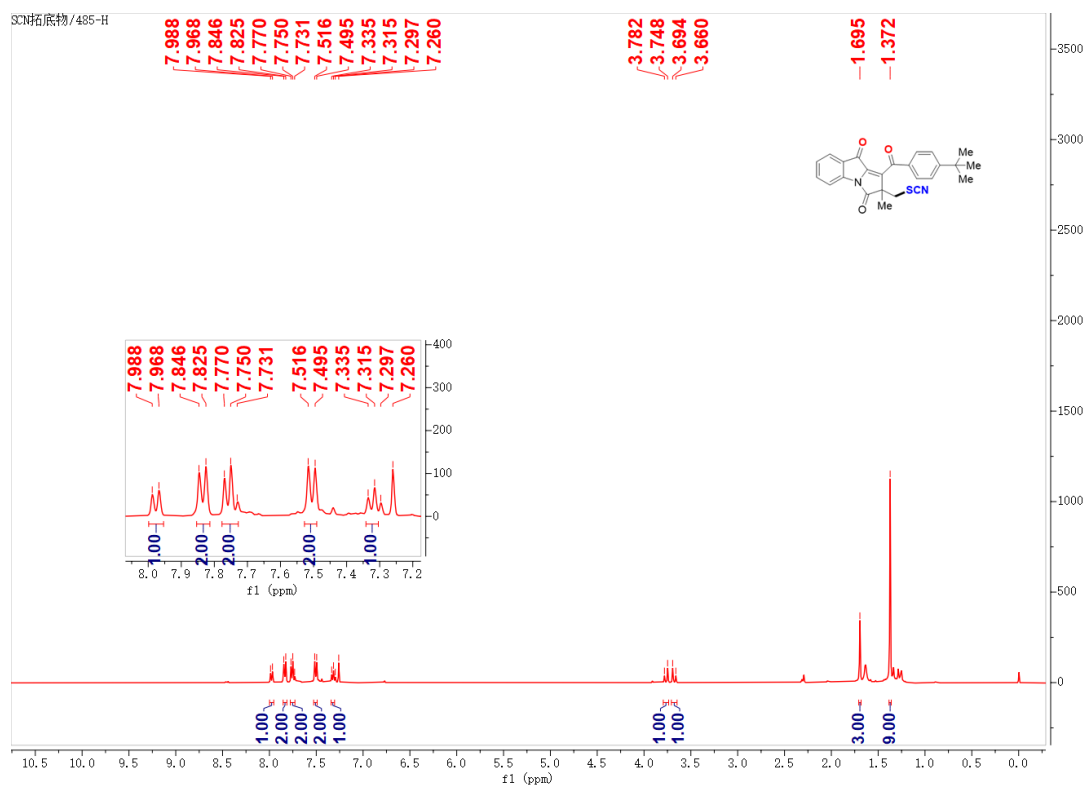

### 14-<sup>13</sup>C {<sup>1</sup>H} NMR (100 MHz, CDCl<sub>3</sub>)

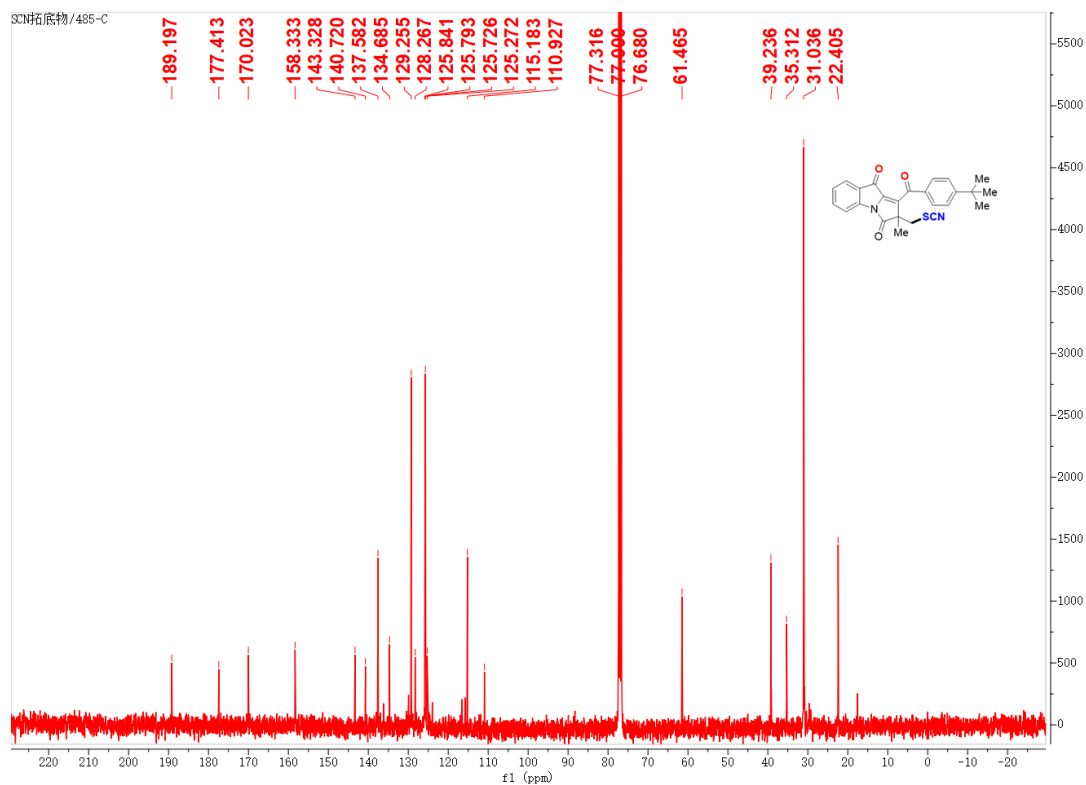

### 15-<sup>1</sup>H NMR (400 MHz, CDCl<sub>3</sub>)

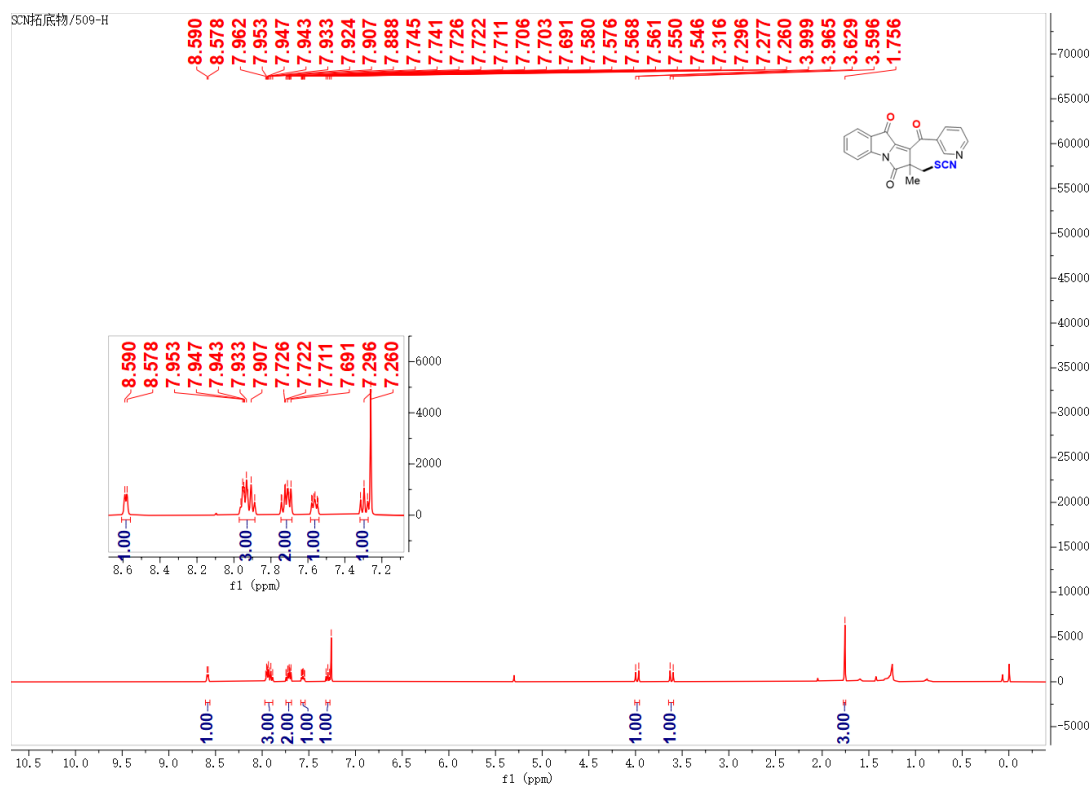

### 15-<sup>13</sup>C {<sup>1</sup>H} NMR (100 MHz, CDCl<sub>3</sub>)

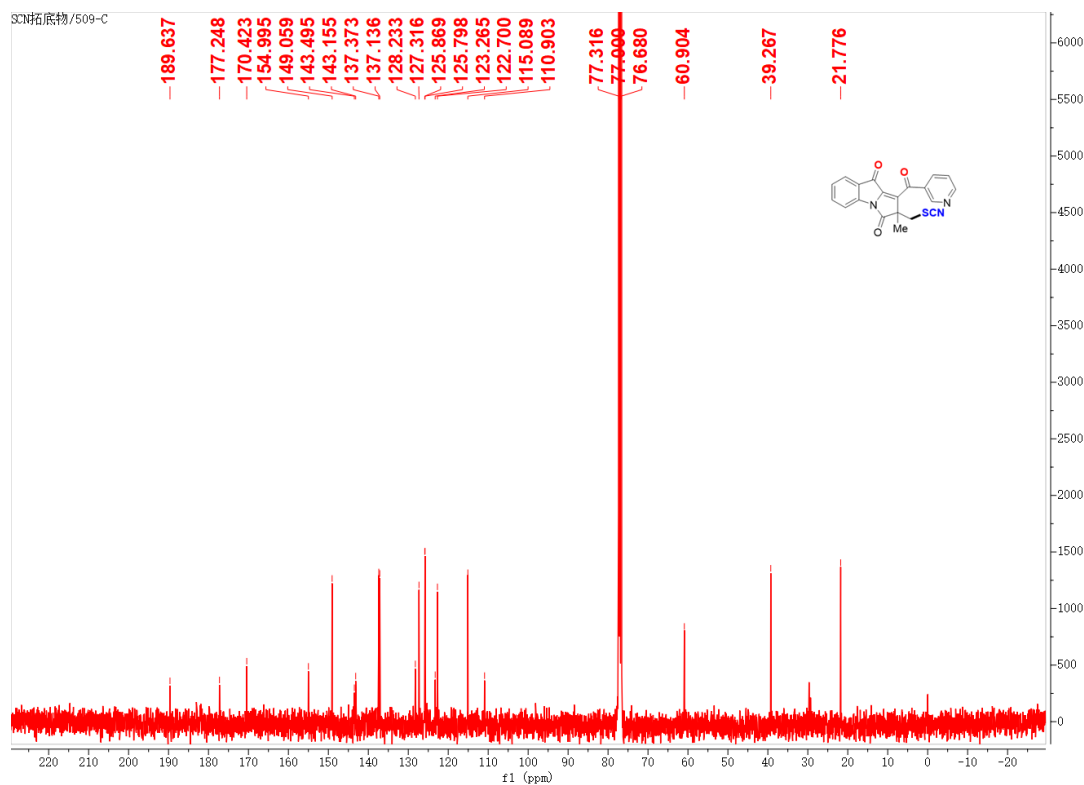

16-<sup>1</sup>H NMR (400 MHz, CDCl<sub>3</sub>)

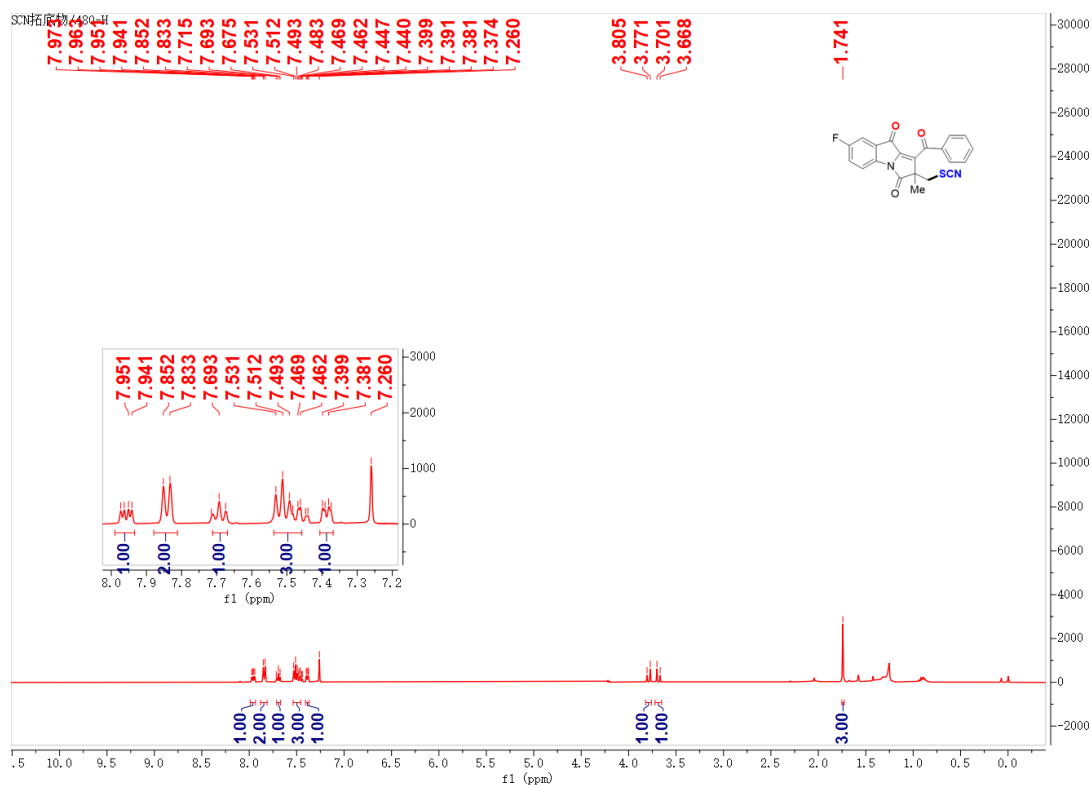

16-<sup>13</sup>C {<sup>1</sup>H} NMR (100 MHz, CDCl<sub>3</sub>)

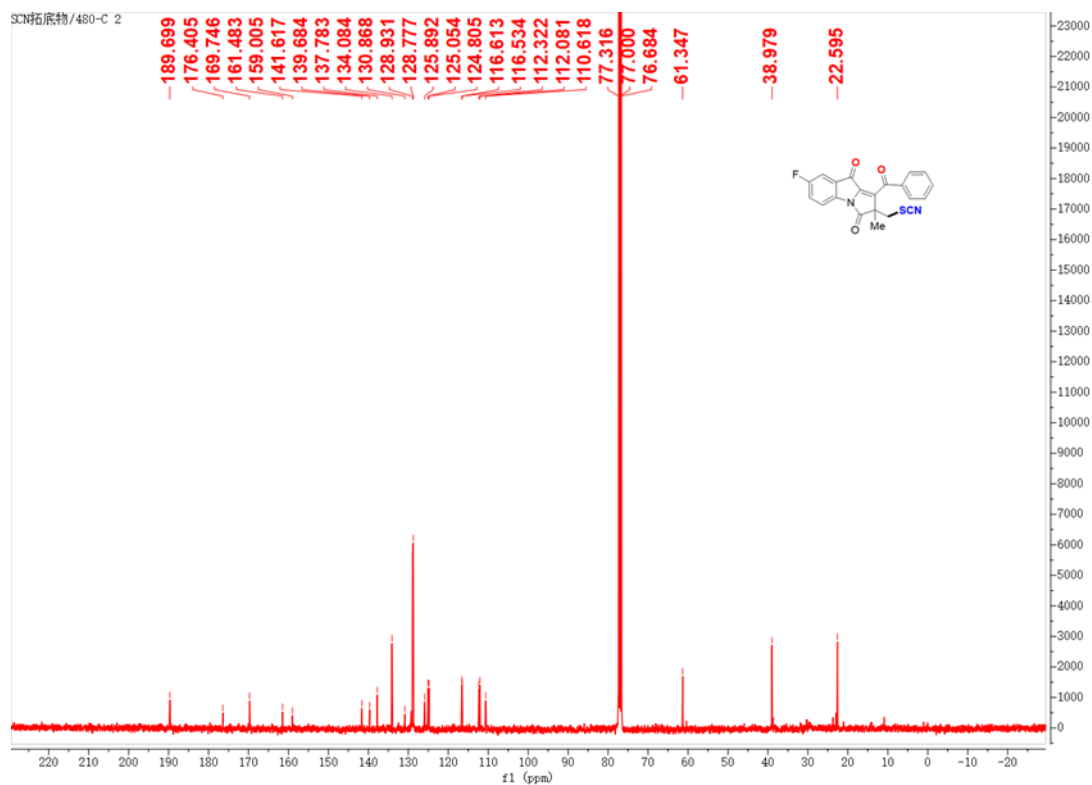

### 16-<sup>19</sup>F NMR (565 MHz, CDCl<sub>3</sub>)

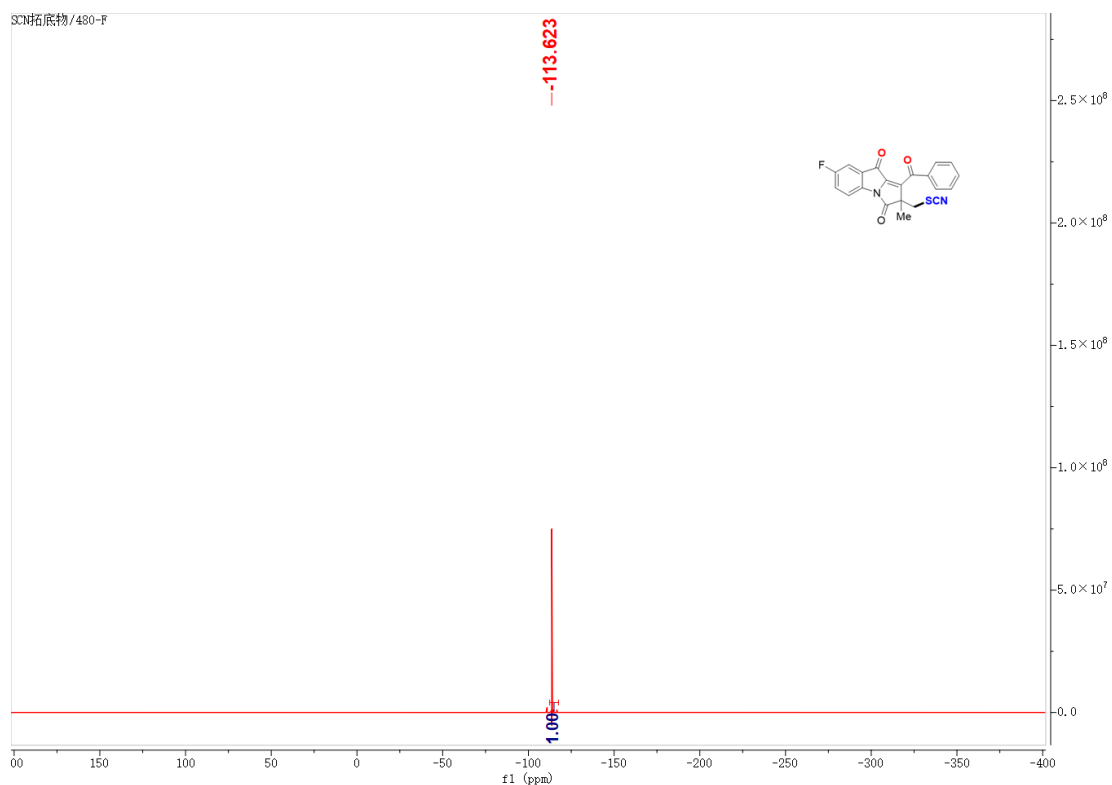

### 17-<sup>1</sup>H NMR (400 MHz, CDCl<sub>3</sub>)

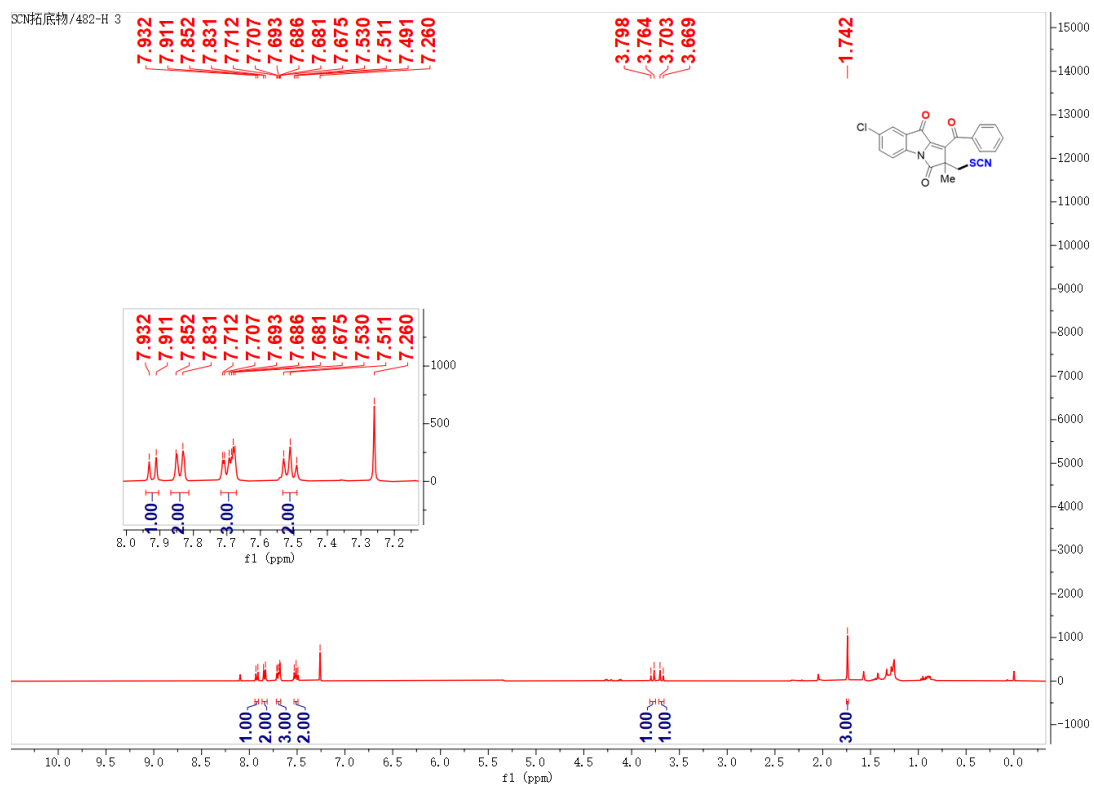

### 17-<sup>13</sup>C {<sup>1</sup>H} NMR (100 MHz, CDCl<sub>3</sub>)

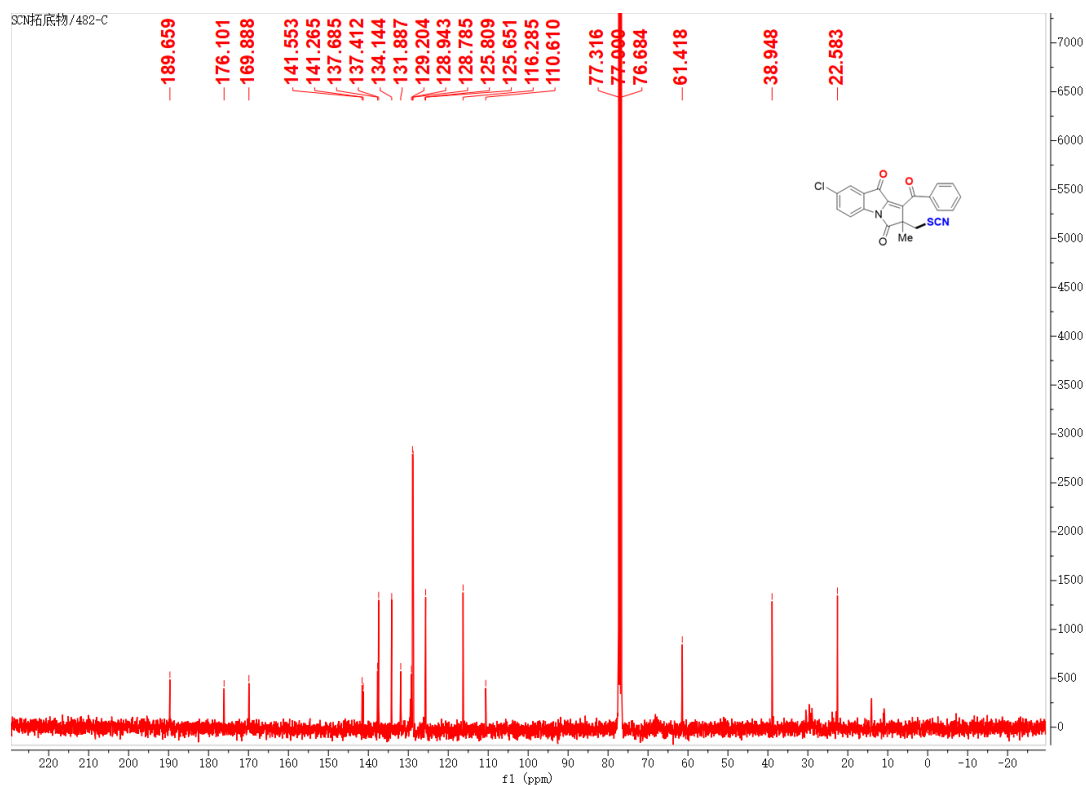

### 18-<sup>1</sup>H NMR (400 MHz, CDCl<sub>3</sub>)

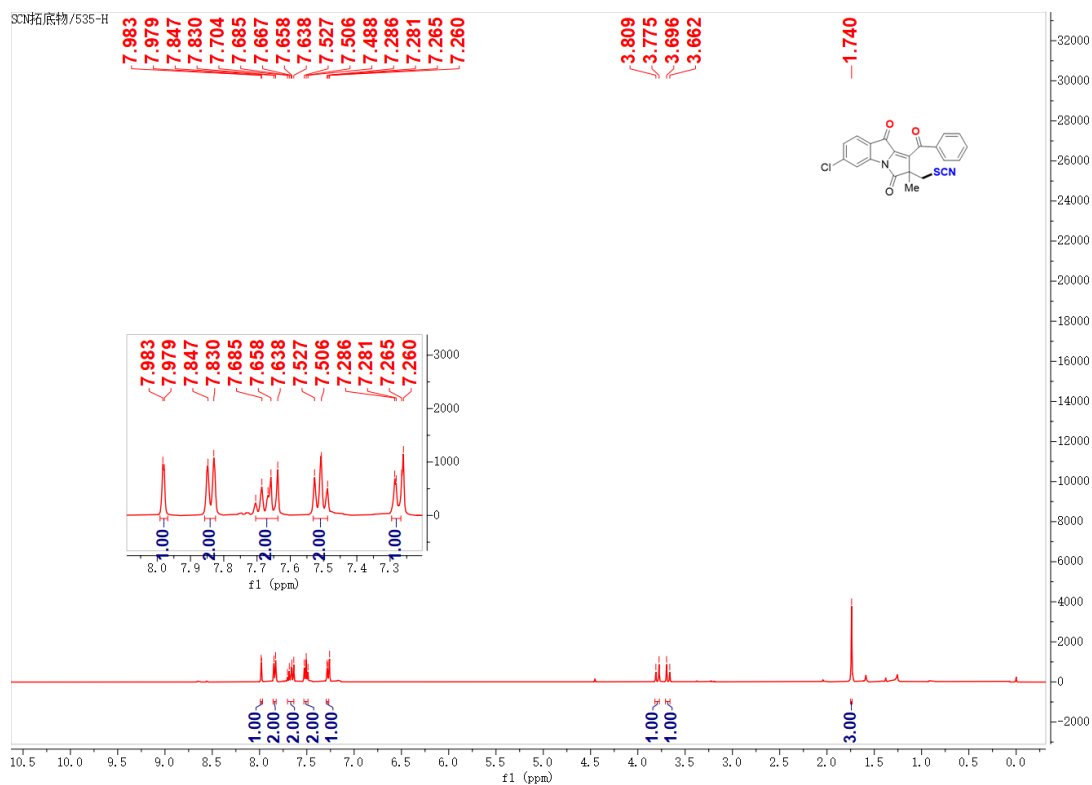

### 18-<sup>13</sup>C {<sup>1</sup>H} NMR (100 MHz, CDCl<sub>3</sub>)

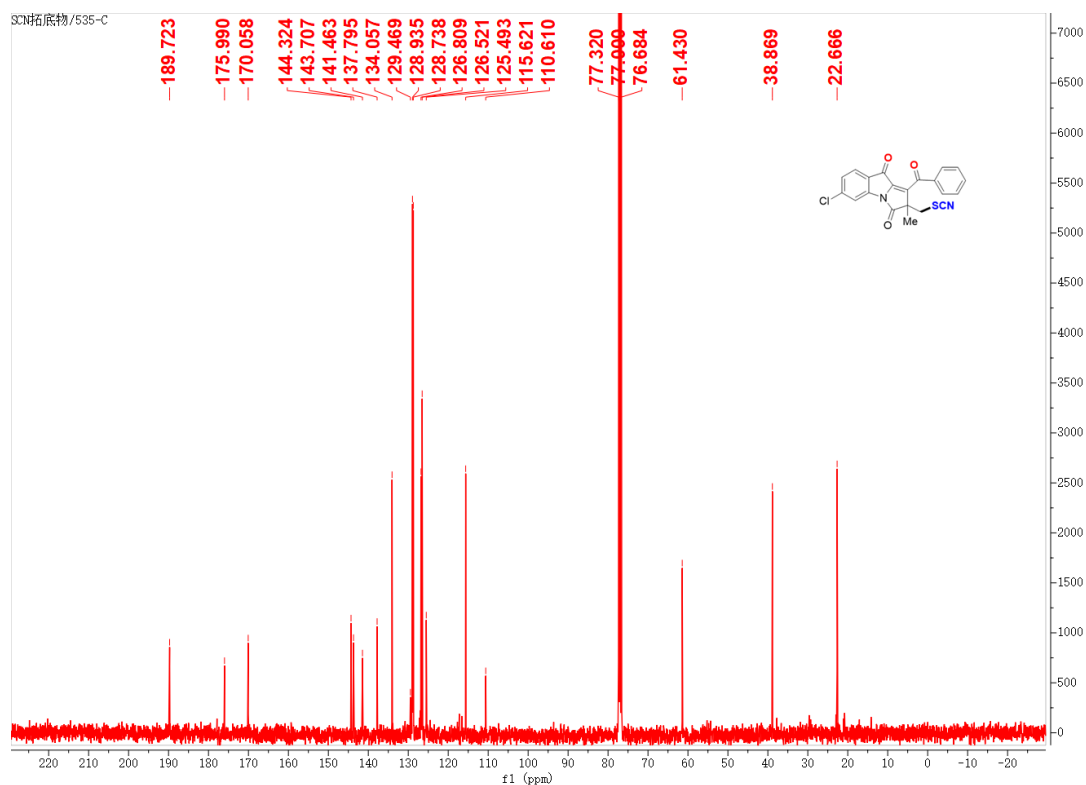

### 19-<sup>1</sup>H NMR (400 MHz, CDCl<sub>3</sub>)

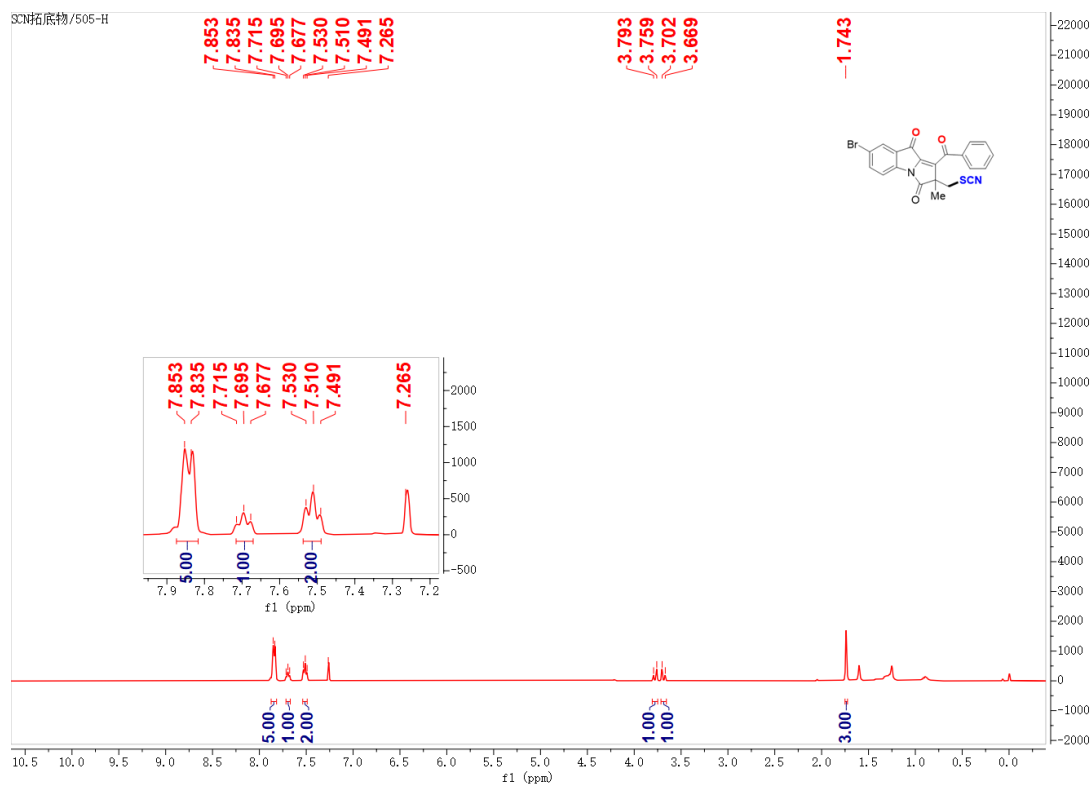

### 19-<sup>13</sup>C {<sup>1</sup>H} NMR (100 MHz, CDCl<sub>3</sub>)

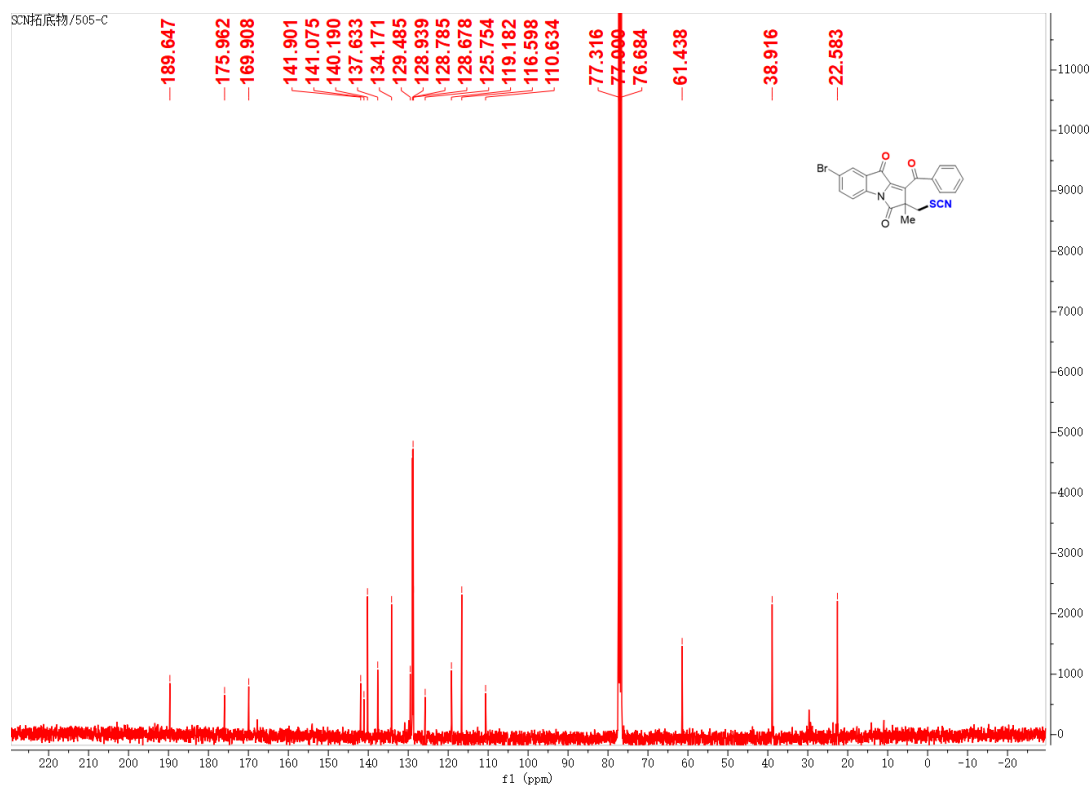

### 20-<sup>1</sup>H NMR (400 MHz, CDCl<sub>3</sub>)

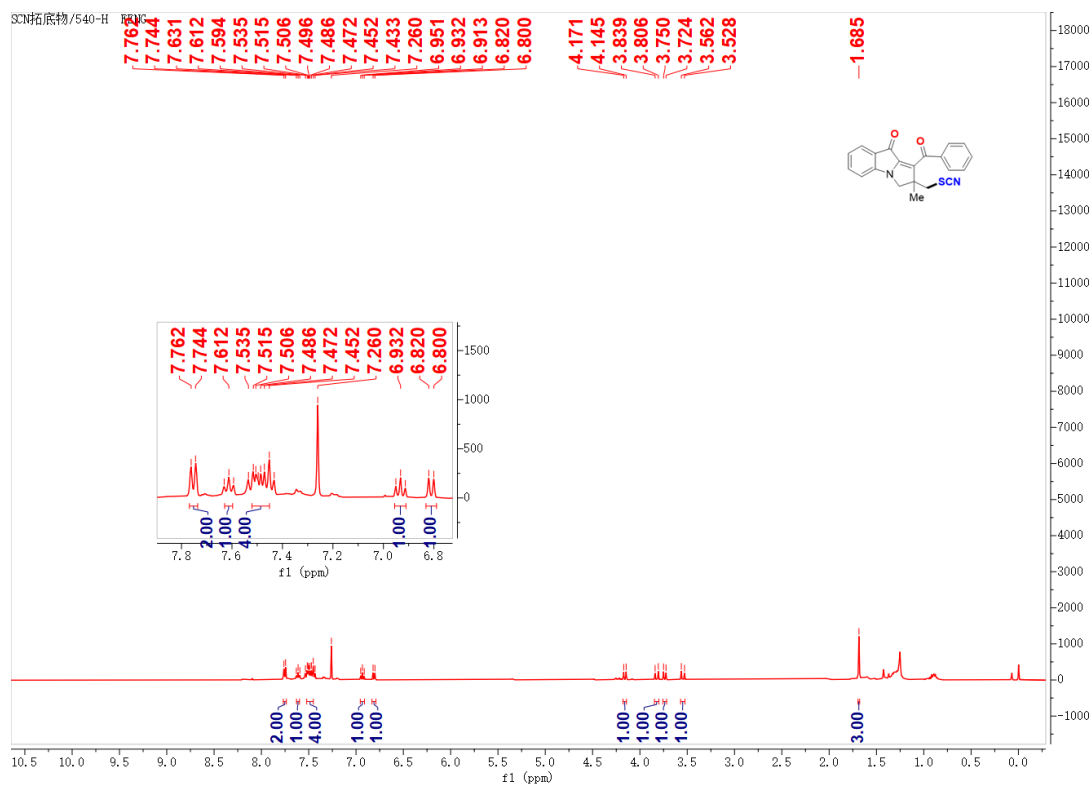

20-<sup>13</sup>C {<sup>1</sup>H} NMR (100 MHz, CDCl<sub>3</sub>)

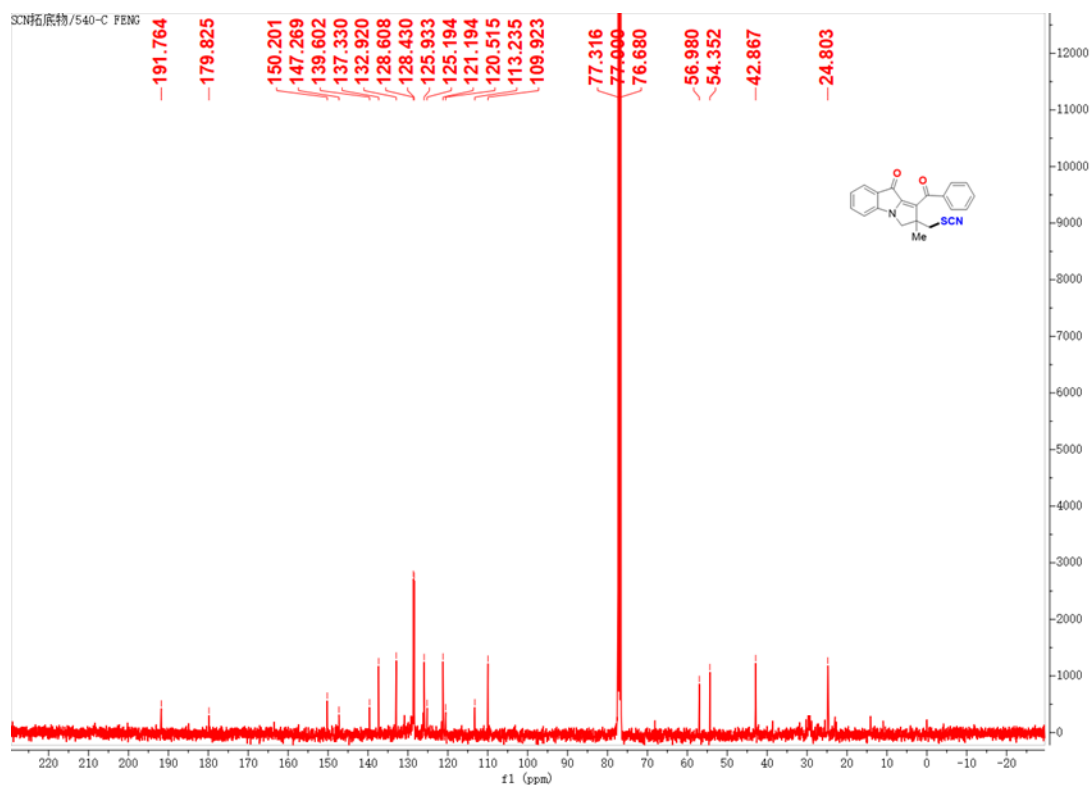

21-<sup>1</sup>H NMR (400 MHz, CDCl<sub>3</sub>)

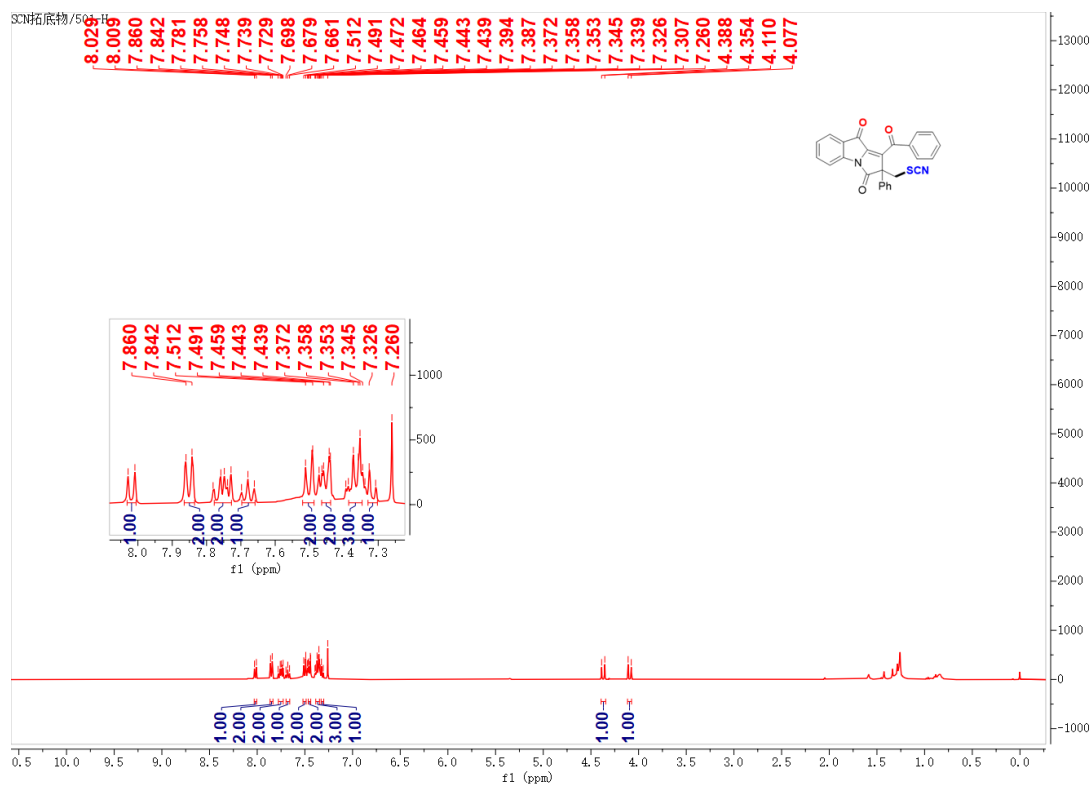

21-<sup>13</sup>C {<sup>1</sup>H} NMR (100 MHz, CDCl<sub>3</sub>)

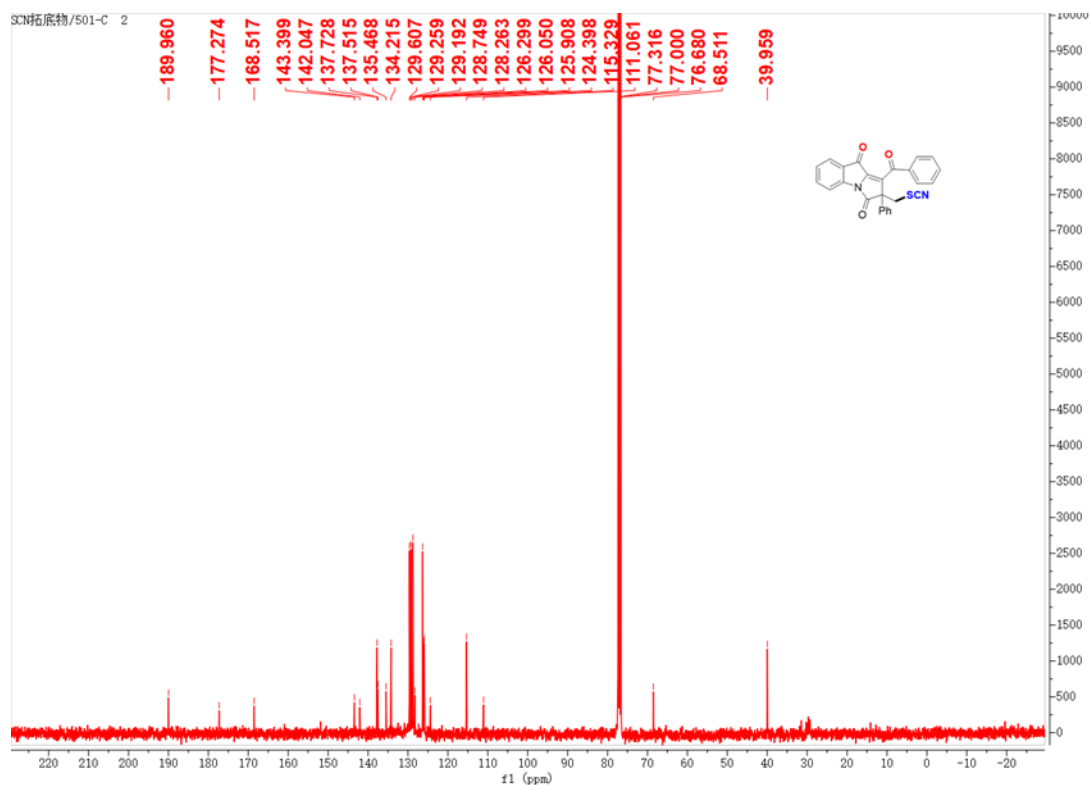

22-<sup>1</sup>H NMR (400 MHz, CDCl<sub>3</sub>)

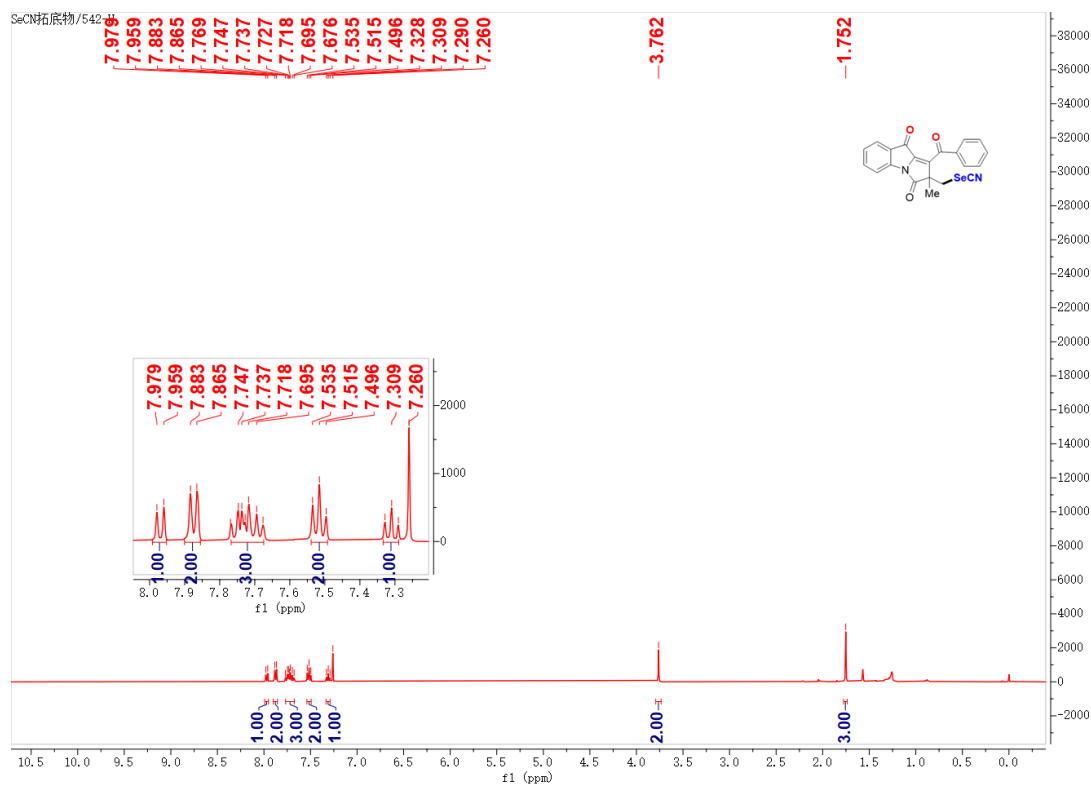

## 22-<sup>13</sup>C {<sup>1</sup>H} NMR (100 MHz, CDCl<sub>3</sub>)

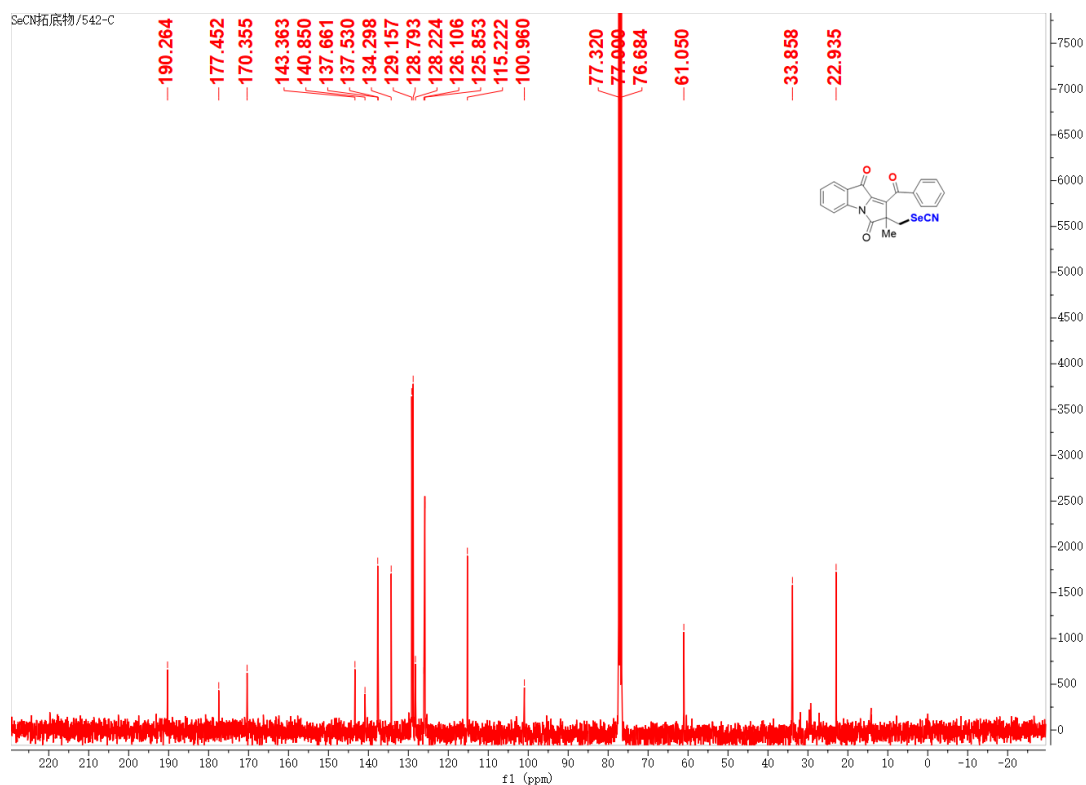

## 23-<sup>1</sup>H NMR (400 MHz, CDCl<sub>3</sub>)

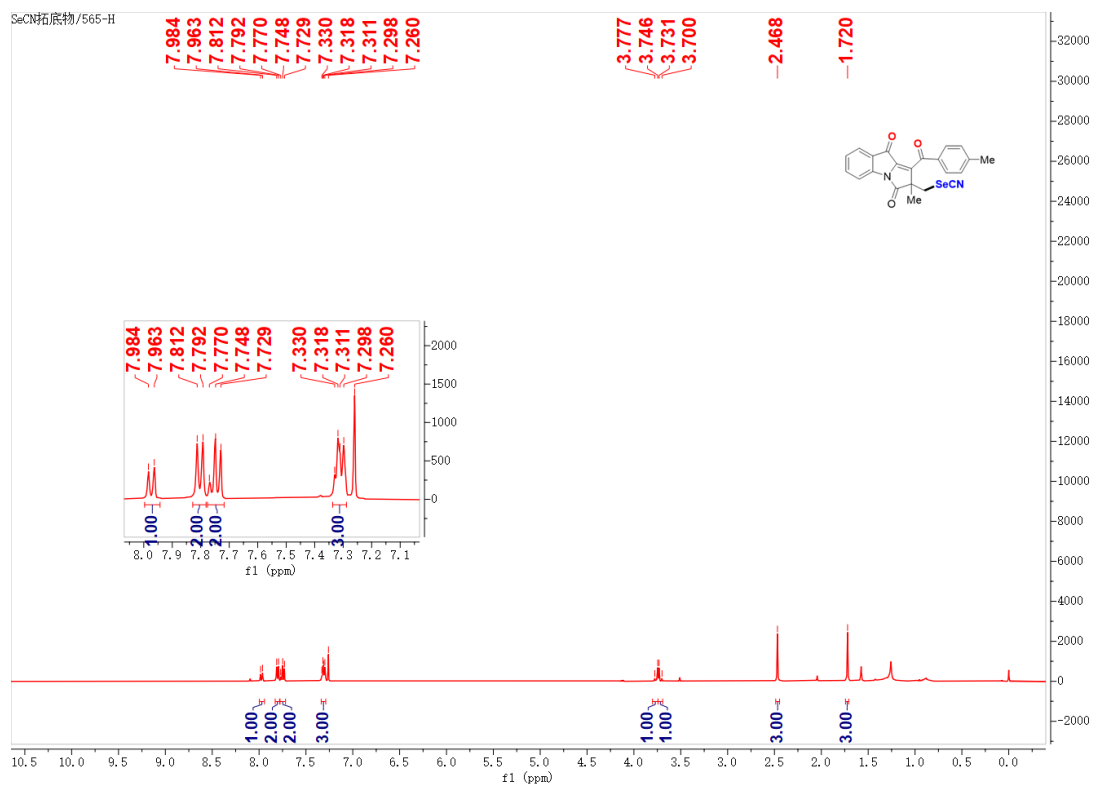

### 23-<sup>13</sup>C {<sup>1</sup>H} NMR (100 MHz, CDCl<sub>3</sub>)

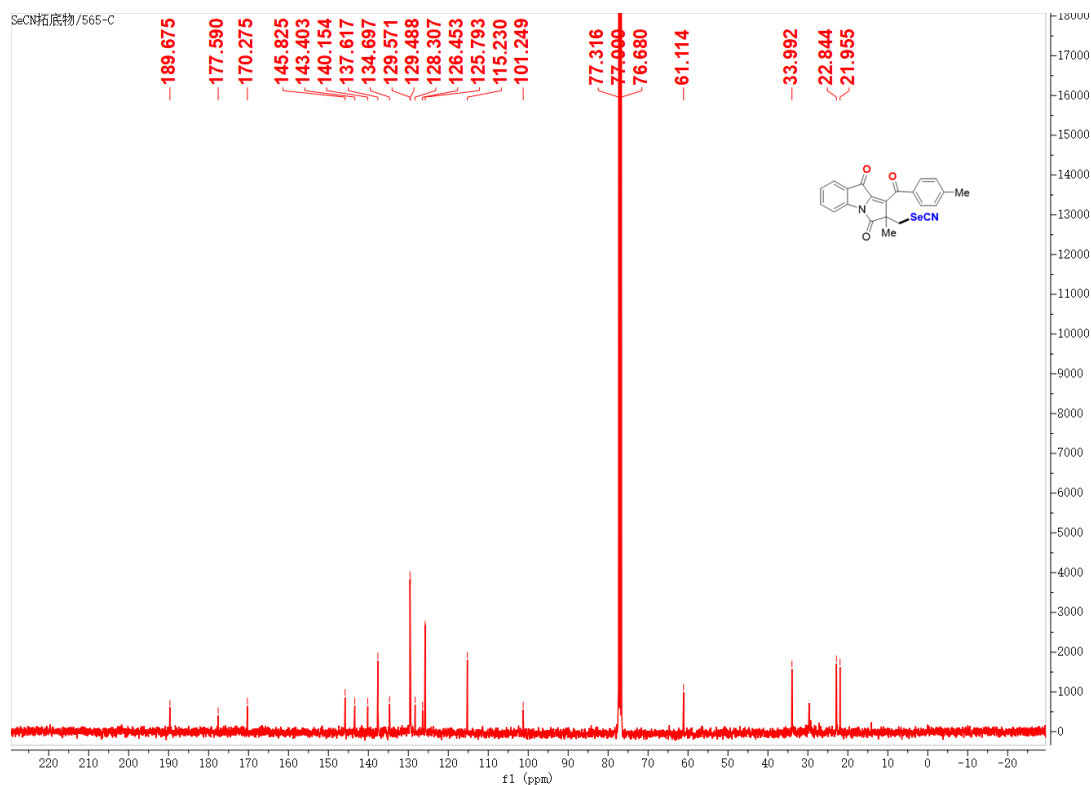

### 24-<sup>1</sup>H NMR (400 MHz, CDCl<sub>3</sub>)

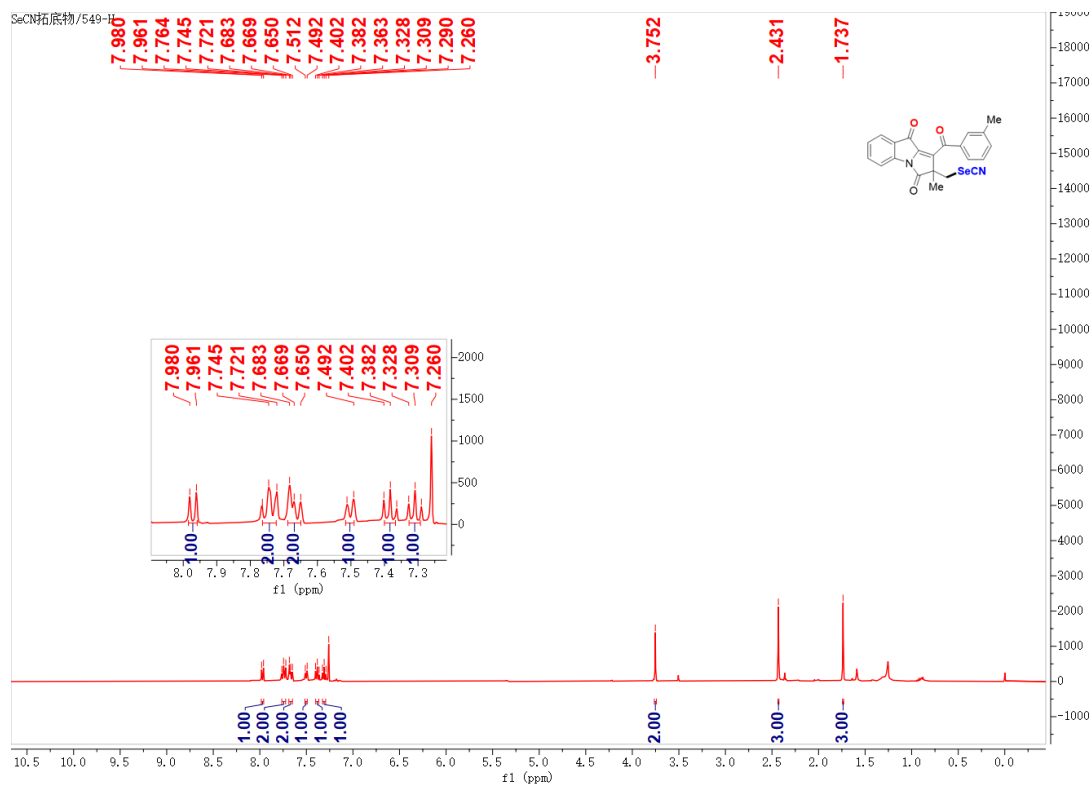

24-<sup>13</sup>C {<sup>1</sup>H} NMR (100 MHz, CDCl<sub>3</sub>)

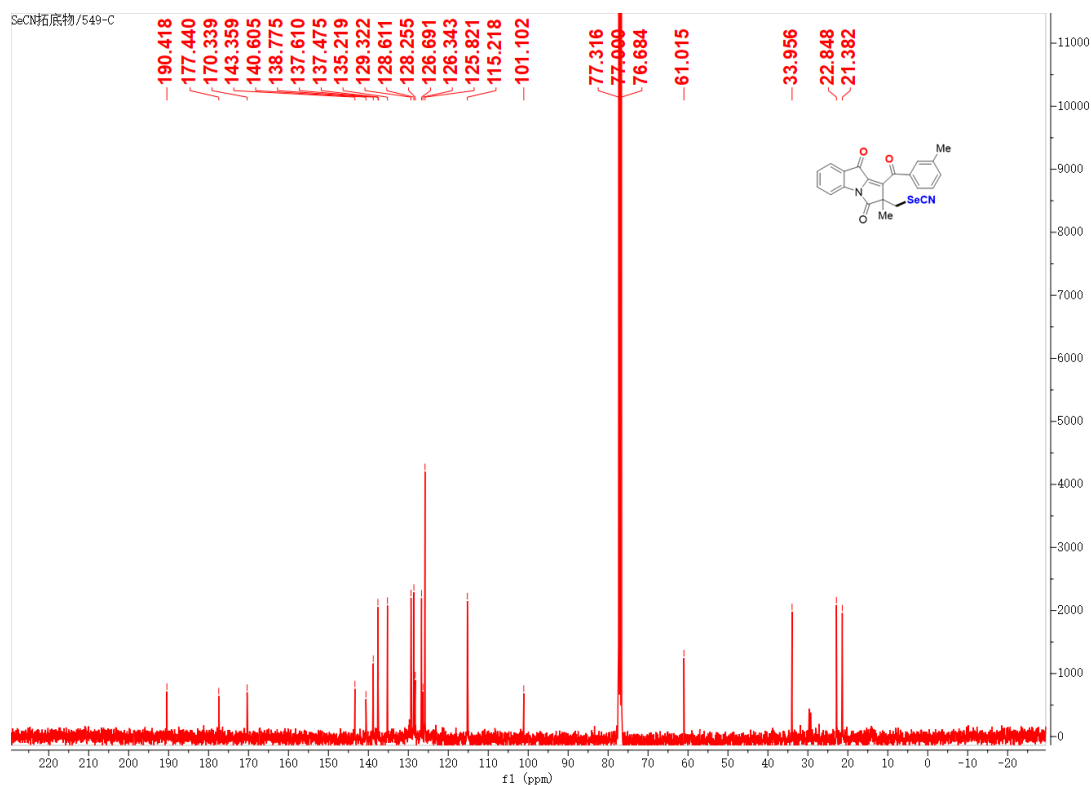

25-<sup>1</sup>H NMR (400 MHz, CDCl<sub>3</sub>)

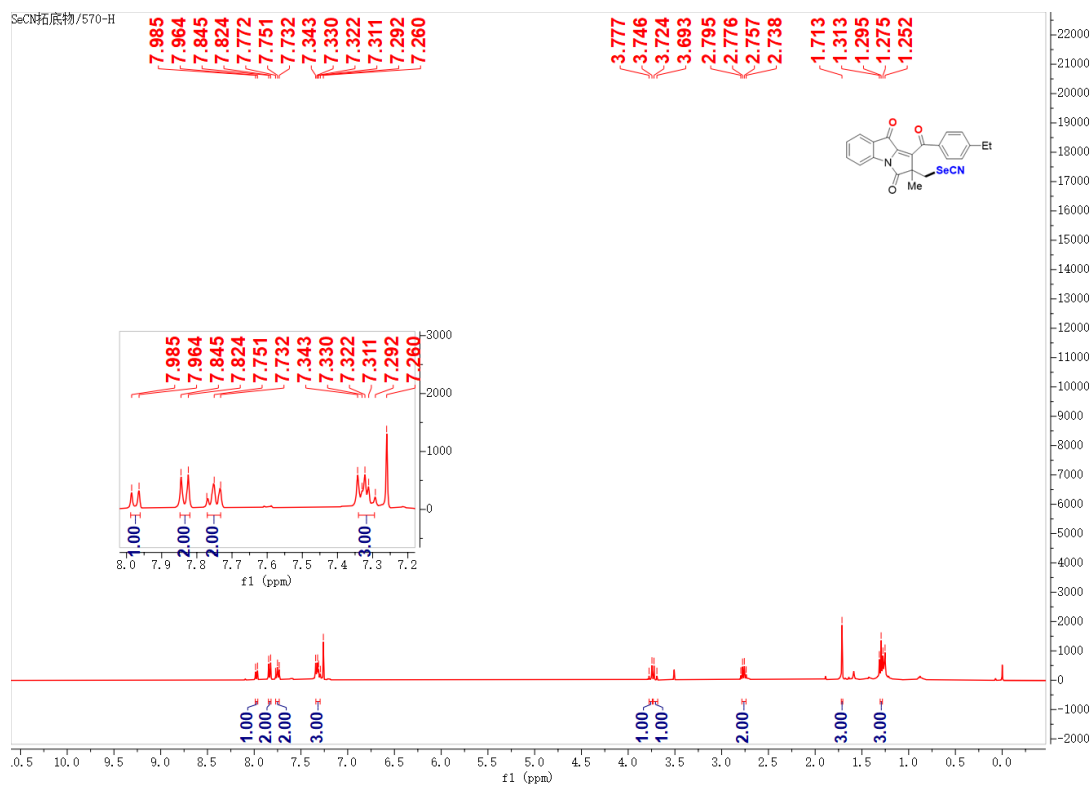

## 25-<sup>13</sup>C {<sup>1</sup>H} NMR (100 MHz, CDCl<sub>3</sub>)

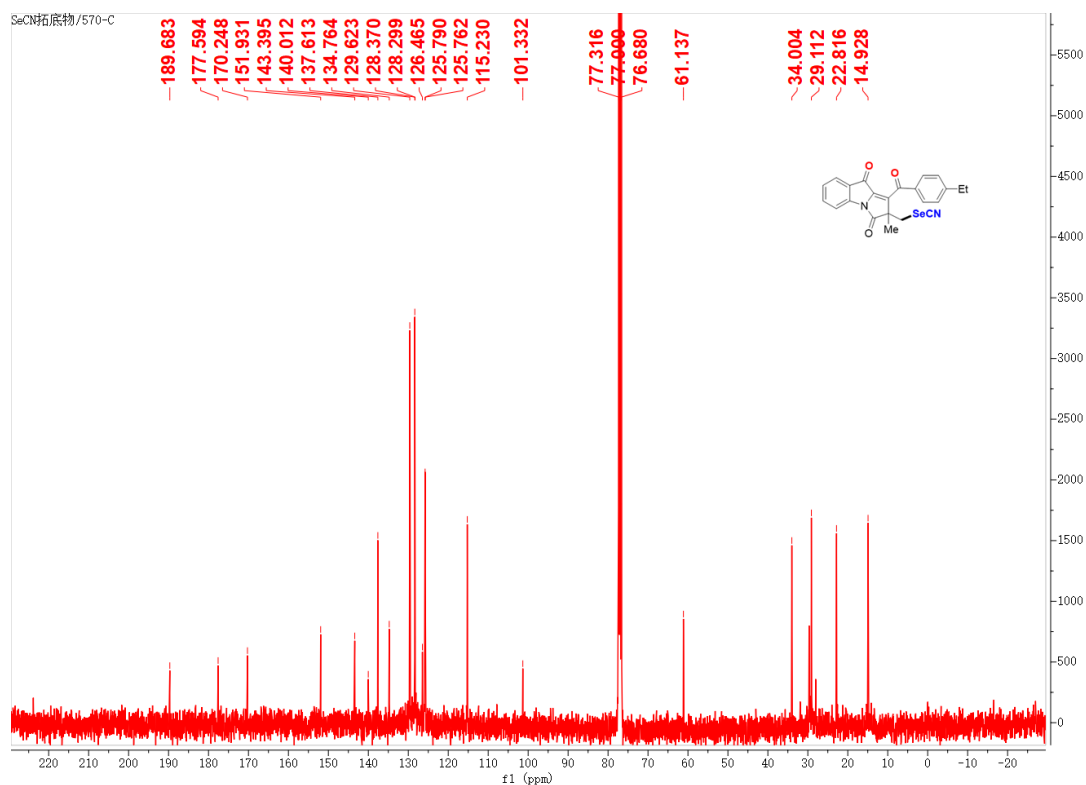

## 26-<sup>1</sup>H NMR (400 MHz, CDCl<sub>3</sub>)

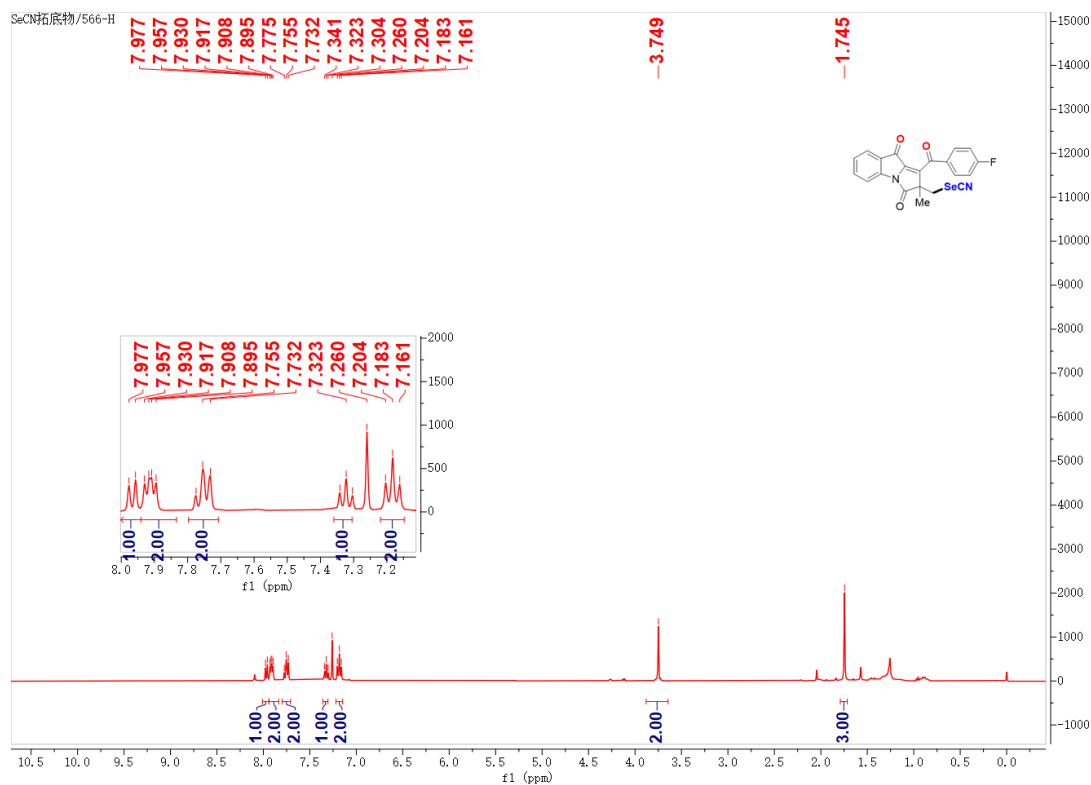

## 26-<sup>13</sup>C {<sup>1</sup>H} NMR (100 MHz, CDCl<sub>3</sub>)

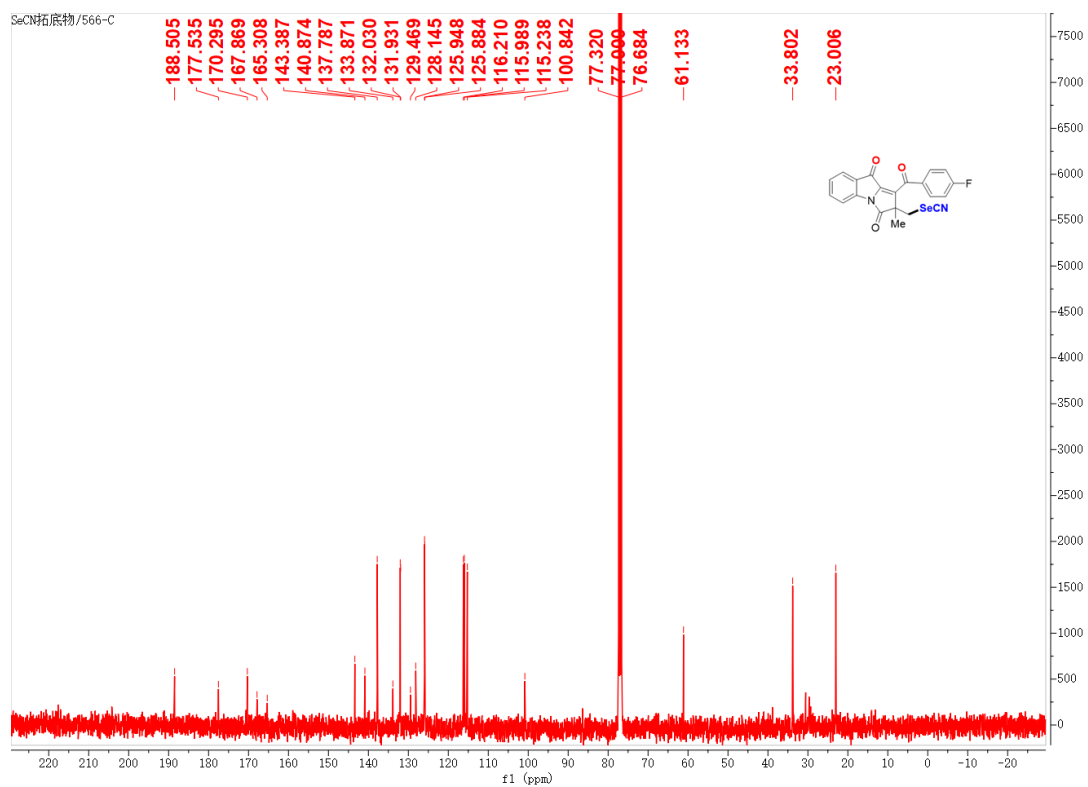

## 26-<sup>19</sup>F NMR (565 MHz, CDCl<sub>3</sub>)

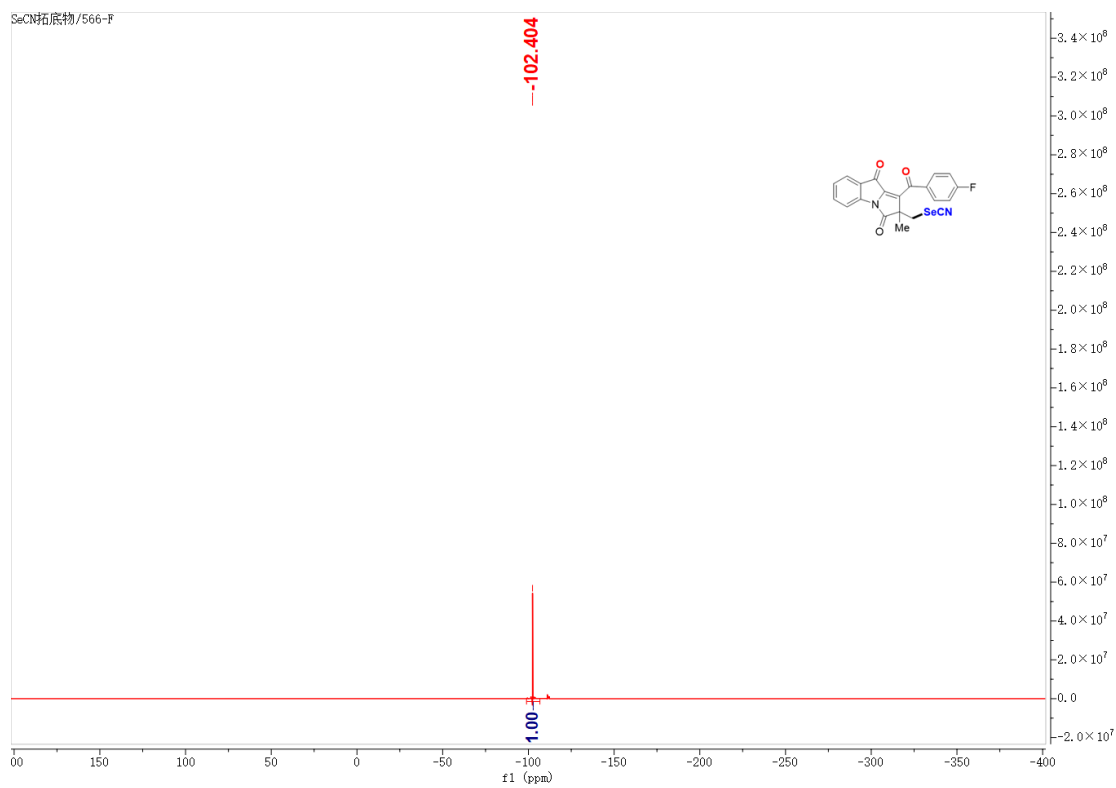

27-<sup>1</sup>H NMR (400 MHz, CDCl<sub>3</sub>)

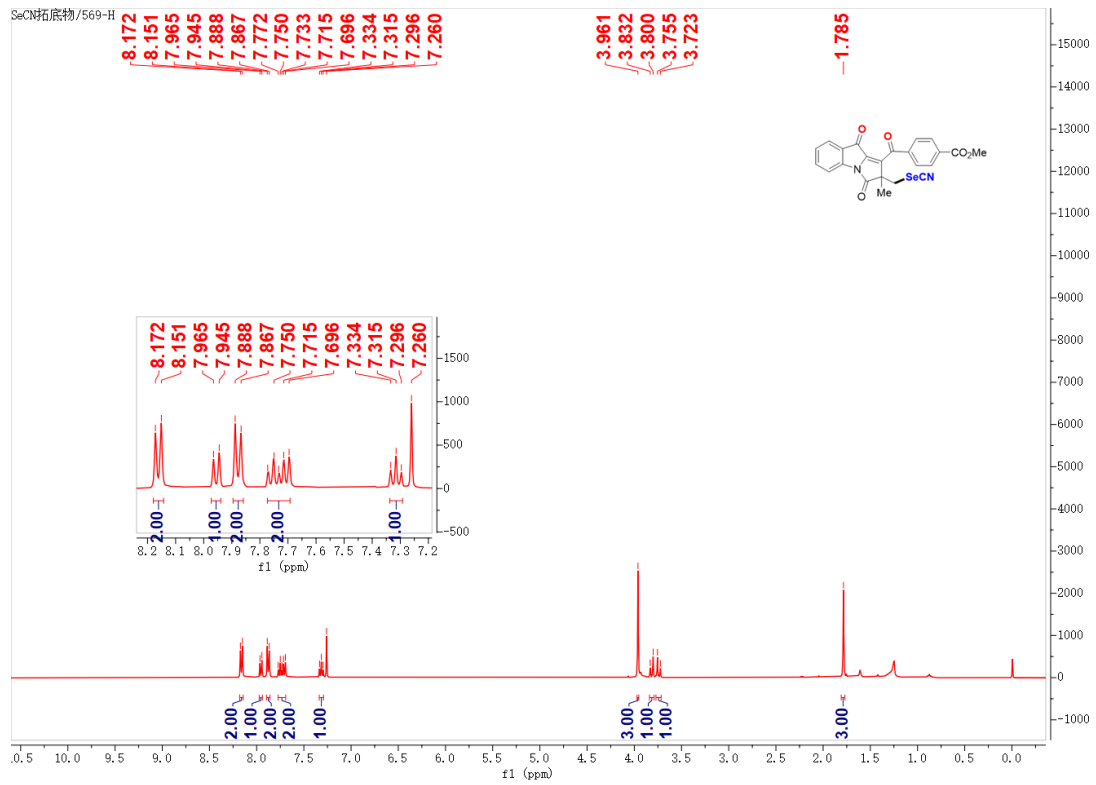

27-<sup>13</sup>C {<sup>1</sup>H} NMR (100 MHz, CDCl<sub>3</sub>)

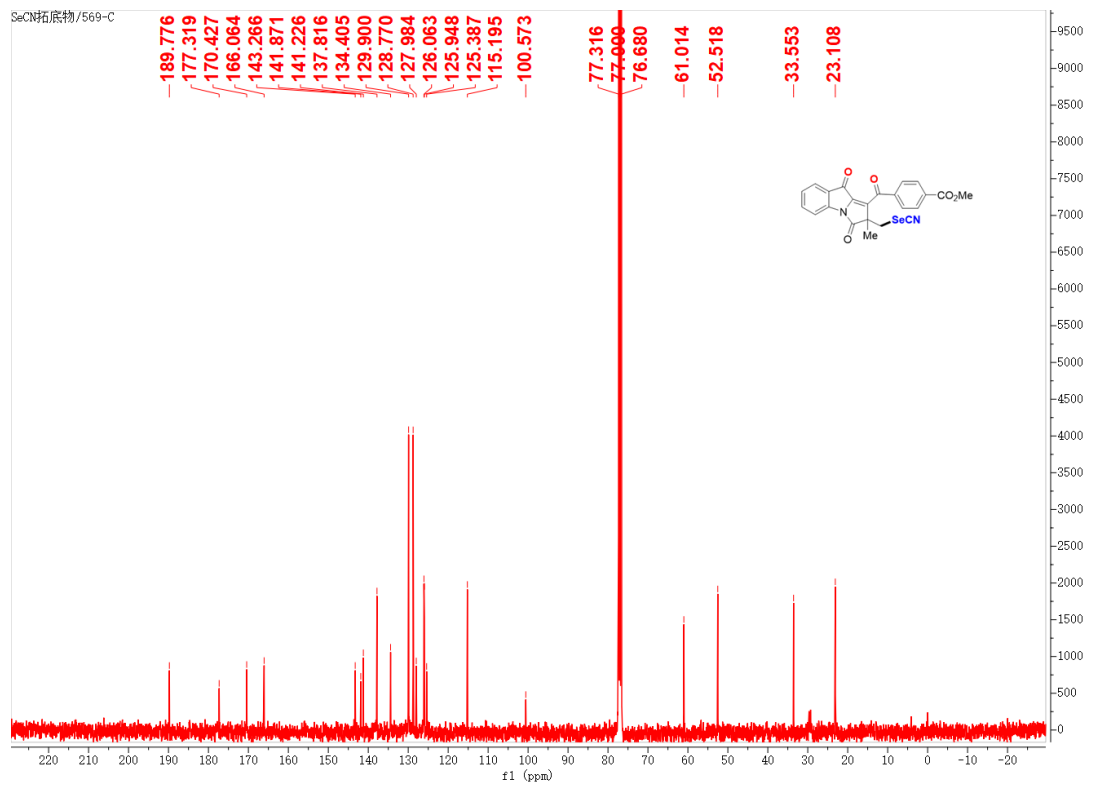



### 29-<sup>1</sup>H NMR (400 MHz, CDCl<sub>3</sub>)

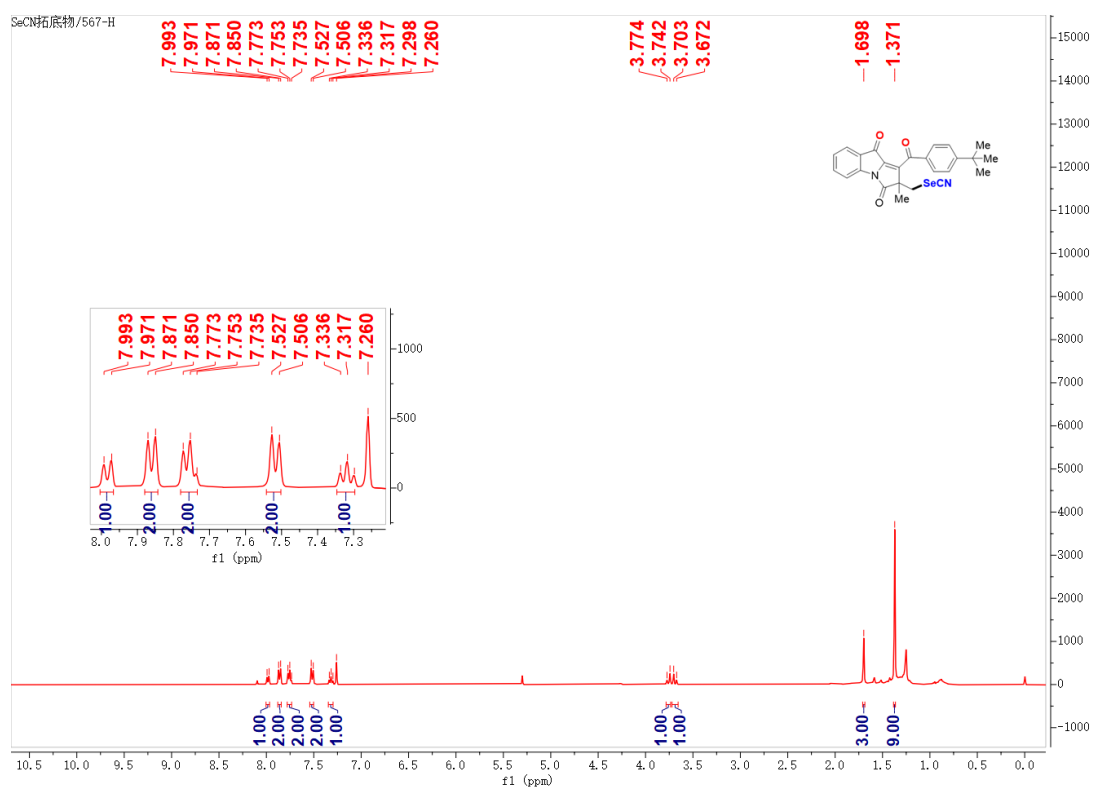

### 29-<sup>13</sup>C {<sup>1</sup>H} NMR (100 MHz, CDCl<sub>3</sub>)

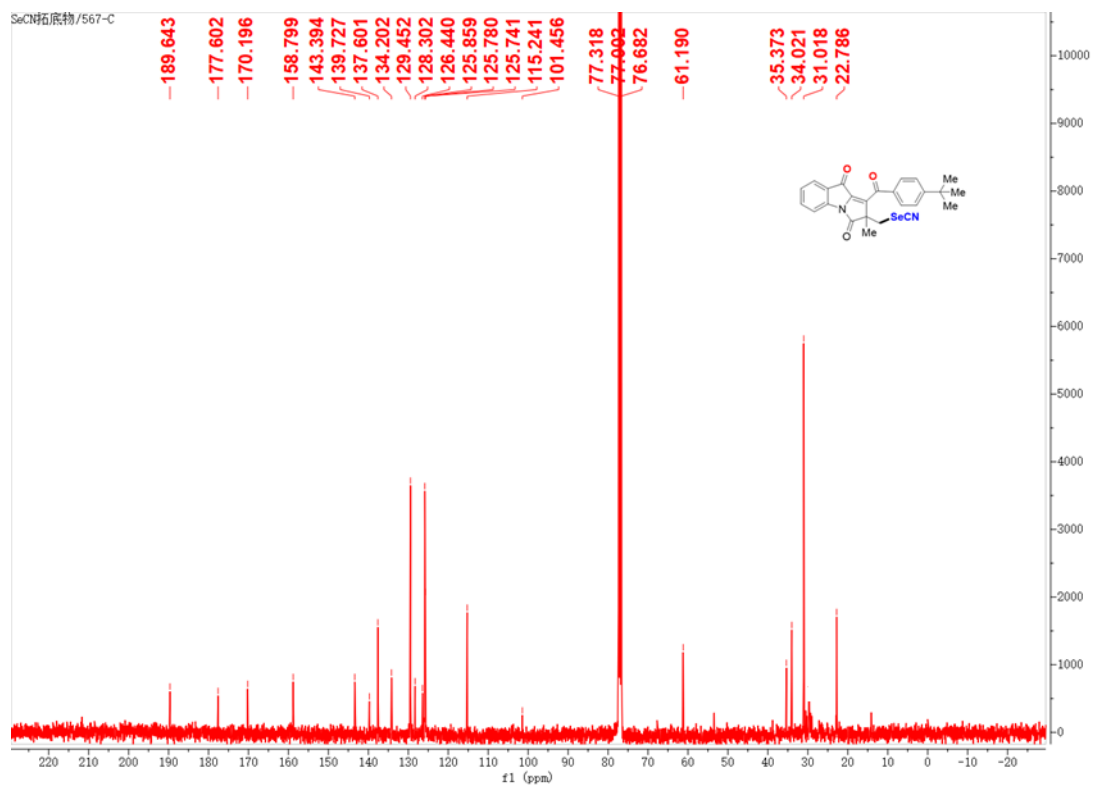



### 31-<sup>1</sup>H NMR (400 MHz, CDCl<sub>3</sub>)

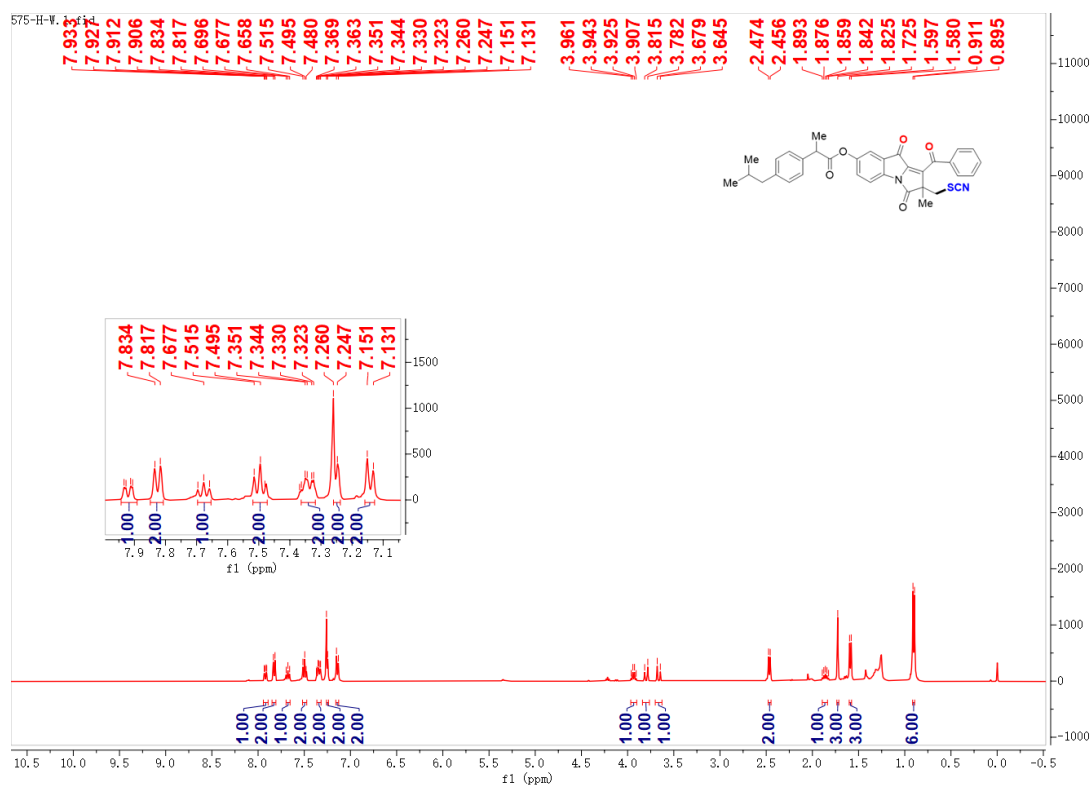

### 31-<sup>13</sup>C {<sup>1</sup>H} NMR (100 MHz, CDCl<sub>3</sub>)

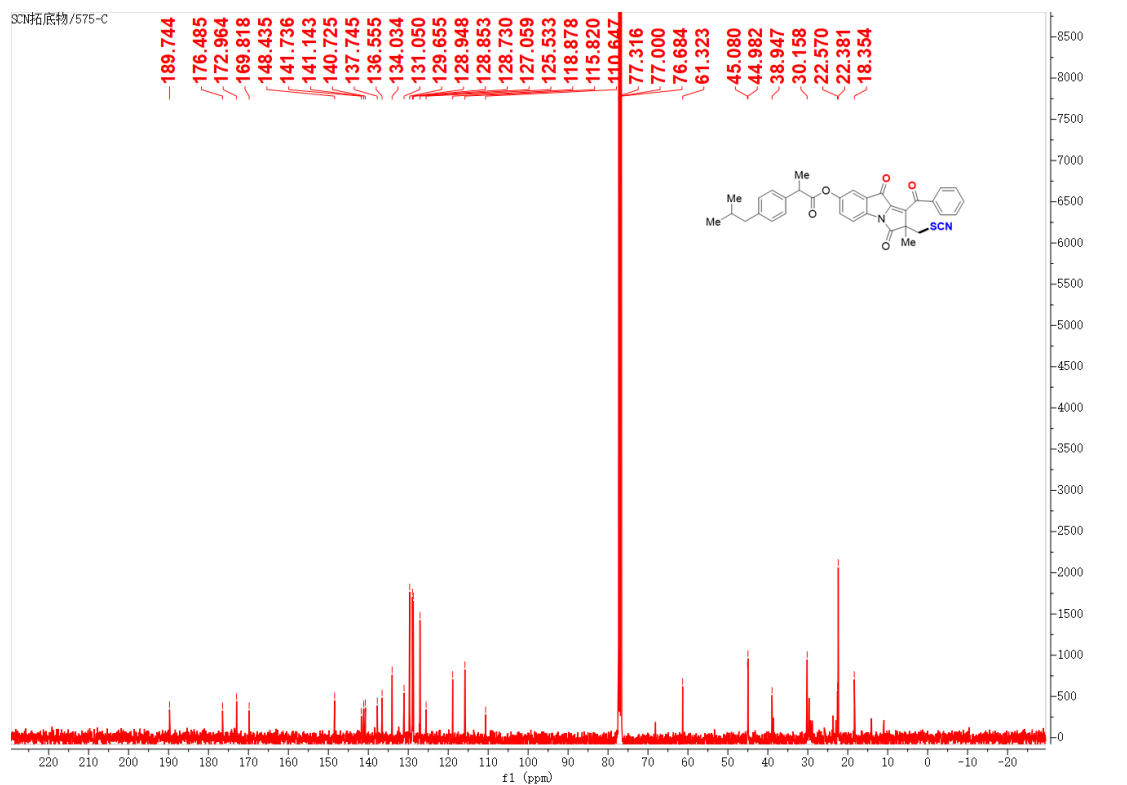

32-<sup>1</sup>H NMR (400 MHz, CDCl<sub>3</sub>)

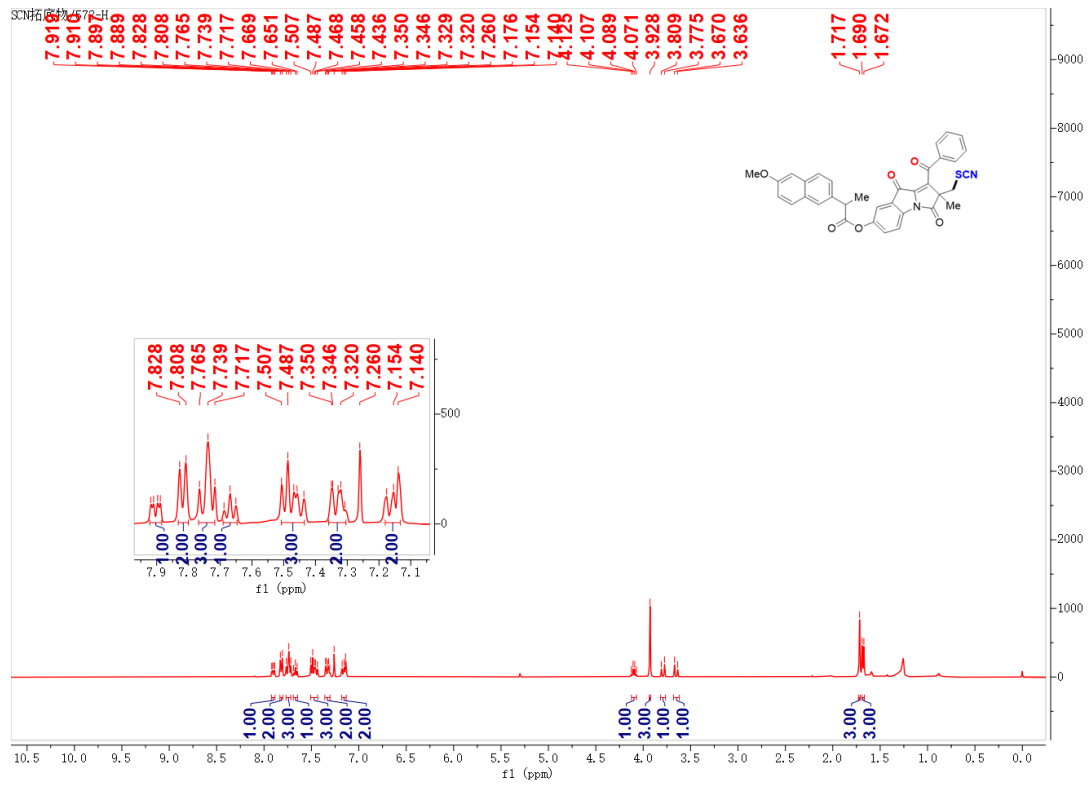

32-<sup>13</sup>C {<sup>1</sup>H} NMR (100 MHz, CDCl<sub>3</sub>)

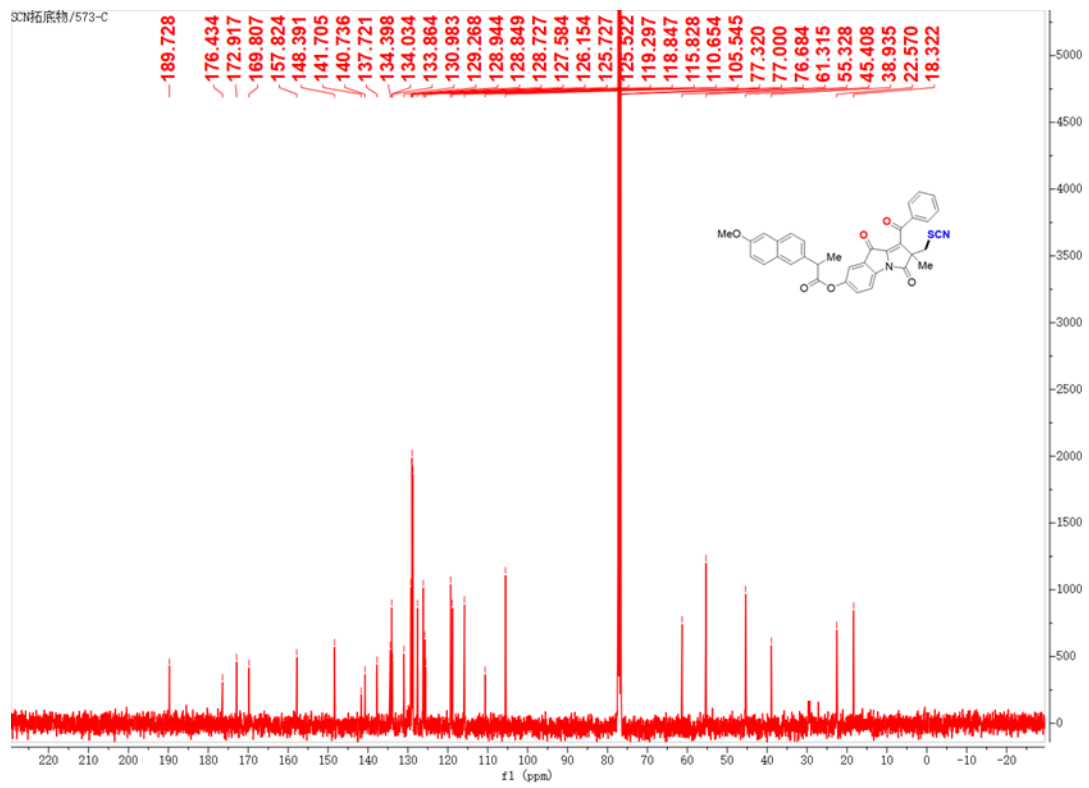

33-<sup>1</sup>H NMR (400 MHz, CDCl<sub>3</sub>)

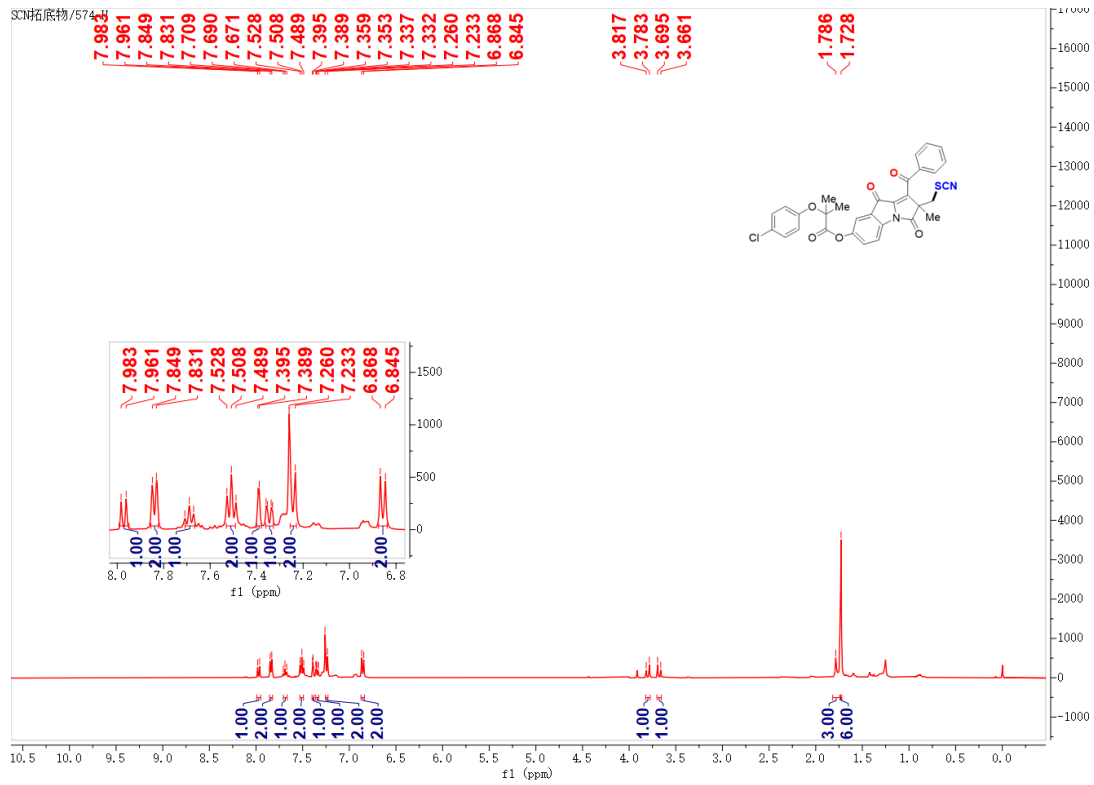

33-<sup>13</sup>C {<sup>1</sup>H} NMR (100 MHz, CDCl<sub>3</sub>)

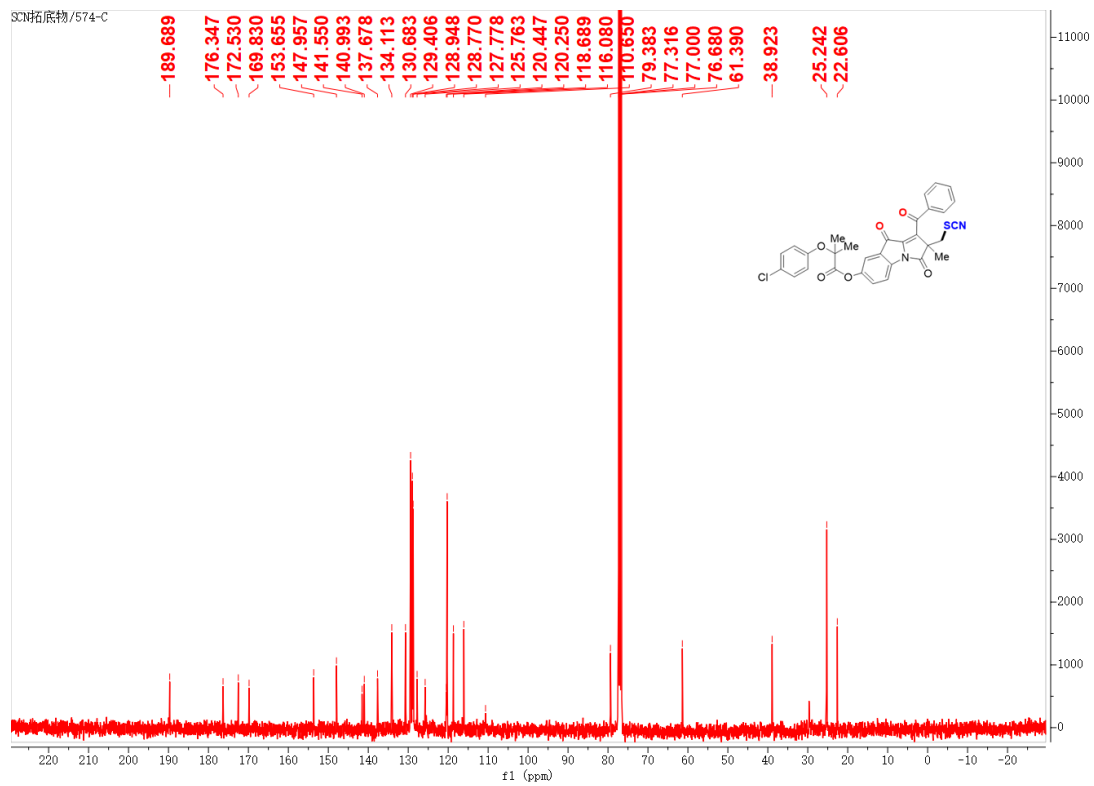

### 34-<sup>1</sup>H NMR (400 MHz, CDCl<sub>3</sub>)

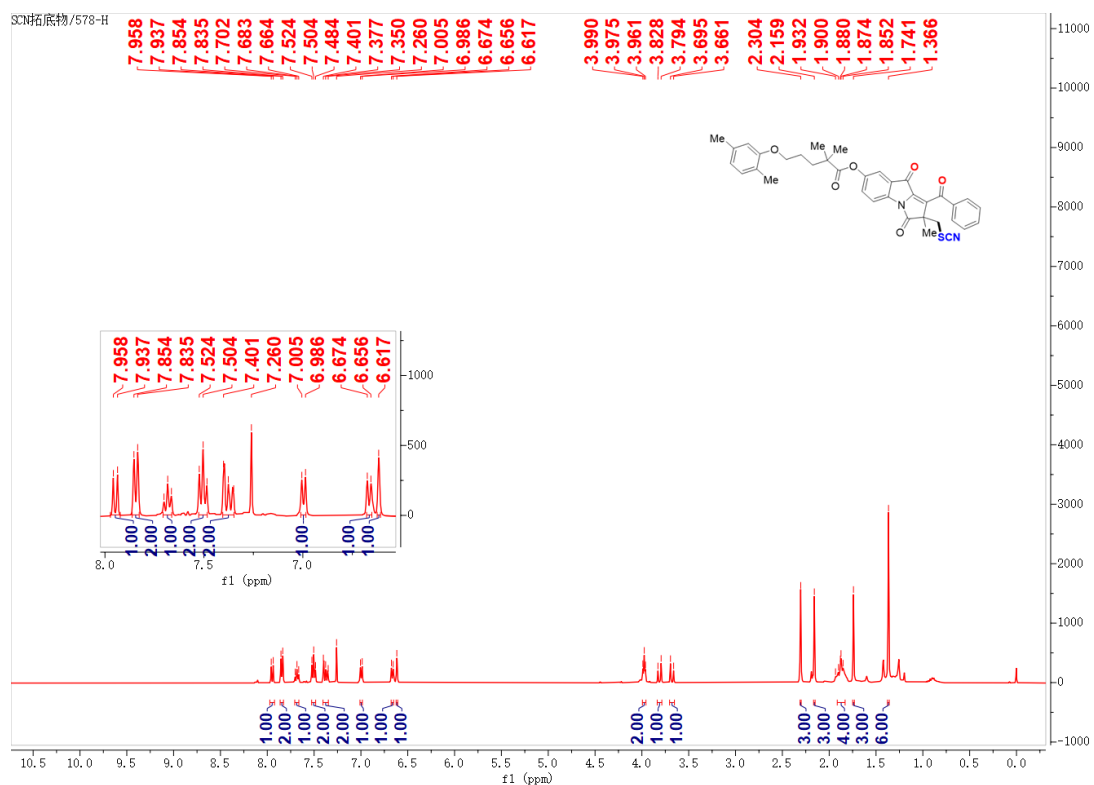

### 34-<sup>13</sup>C {<sup>1</sup>H} NMR (100 MHz, CDCl<sub>3</sub>)

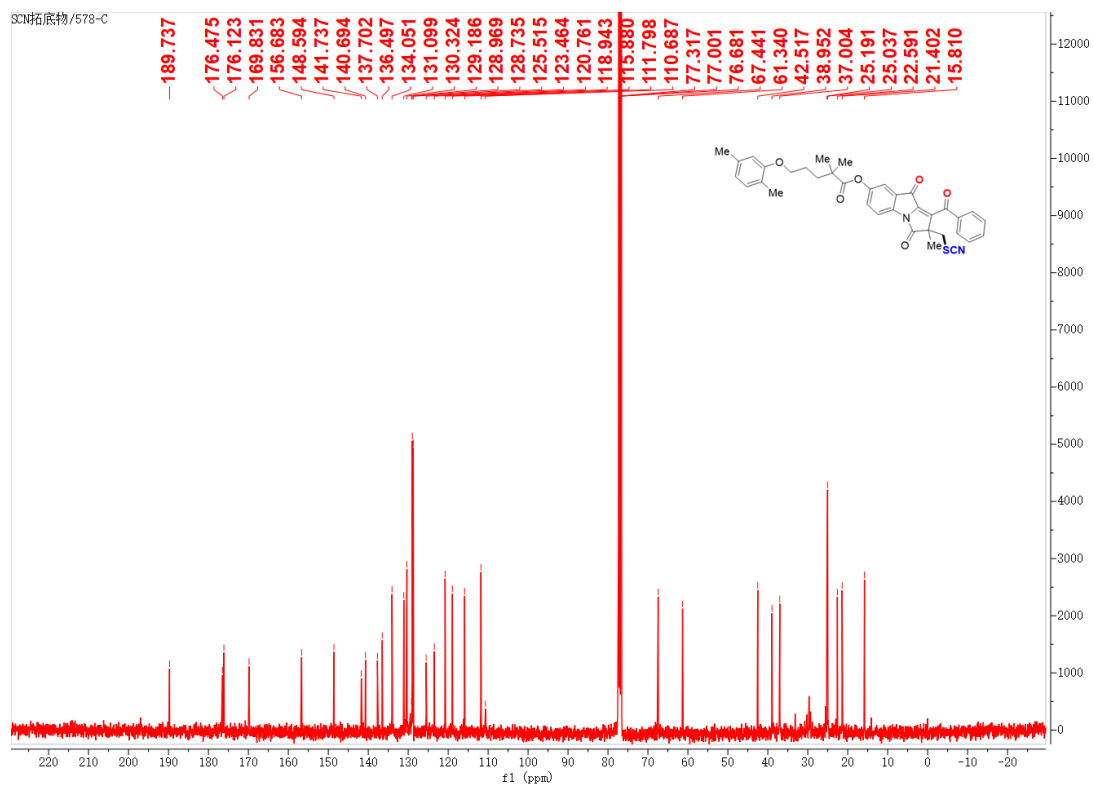

Supplement: d6ob00481d1.pdf [file d6ob00481d1.pdf]
